# Supplementary material for: Dinuclear group IV metal complexes based on a bis(indenyl)-(E/Z)-stilbene platform: a potential prototype of “photoswitchable” catalysts for olefin polymerization
Source: Royal Society of Chemistry journal article supplement (doi:10.1039/d4dt00498a), 2024-01-01
Supplement: d4dt00498a1.pdf [file d4dt00498a1.pdf]

## Supporting Information

### Dinuclear Group IV Metal Complexes based on a Bis(indenyl)-(E/Z)-Stilbene Platform: A Potential Prototype of “Photoswitchable” Catalysts for Olefin Polymerization

Nuria Romero,<sup>1,a</sup> Thierry Chavagnan,<sup>1,a</sup> Thierry Roisnel,<sup>2</sup> Alexandre Welle,<sup>3</sup>  
Evgueni Kirillov,<sup>1,\*</sup> and Jean-François Carpentier<sup>1,\*</sup>

#### Table of contents

- Figure S1.** ORTEP plot of the solid-state molecular structure of (*E*)-3,3'-dibromostilbene.  
**Figure S2.** ORTEP plot of the solid-state molecular structure of (*E*)-2,2'-dibromostilbene.  
**Figure S3.** ORTEP plot of the solid-state molecular structure of (*Z*)-2,2'-dibromostilbene.  
**Figure S4.** <sup>1</sup>H NMR spectrum of {*o*-(*E*)-BisIndSB}H<sub>2</sub>.  
**Figure S5.** <sup>13</sup>C{<sup>1</sup>H} NMR spectrum of {*o*-(*E*)-BisIndSB}H<sub>2</sub>.  
**Figure S6.** <sup>1</sup>H NMR spectrum of {*o*-(*Z*)-BisIndSB}H<sub>2</sub>.  
**Figure S7.** <sup>13</sup>C{<sup>1</sup>H} NMR spectrum of {*o*-(*Z*)-BisIndSB}H<sub>2</sub>.  
**Figure S8.** ORTEP plot of the solid-state molecular structure of {*o*-(*E*)-BisIndSB}H<sub>2</sub>.  
**Figure S9.** ORTEP plot of the solid-state molecular structure of {*o*-(*Z*)-BisIndSB}H<sub>2</sub>.  
**Figure S10.** <sup>1</sup>H NMR spectrum of {*o*-(*Z*)-BisIndSB}(ZrCl<sub>2</sub>Cp\*)<sub>2</sub>.  
**Figure S11.** <sup>1</sup>H NMR spectrum of {*m*-(*E*)-BisIndSB}(ZrCl<sub>2</sub>Cp\*)<sub>2</sub>.  
**Figure S12.** <sup>13</sup>C{<sup>1</sup>H} NMR spectrum of {*m*-(*E*)-BisIndSB}(ZrCl<sub>2</sub>Cp\*)<sub>2</sub>.  
**Figure S13.** <sup>1</sup>H-<sup>1</sup>H COSY NMR spectrum of {*m*-(*E*)-BisIndSB}(ZrCl<sub>2</sub>Cp\*)<sub>2</sub>.  
**Figure S14.** <sup>1</sup>H-<sup>13</sup>C HSQC NMR spectrum of {*m*-(*E*)-BisIndSB}(ZrCl<sub>2</sub>Cp\*)<sub>2</sub>.  
**Figure S15.** <sup>1</sup>H NMR spectra (C<sub>6</sub>D<sub>6</sub>) of a mixture of (*Z*)- and (*E*)-{*m*-BisIndSB}(ZrCl<sub>2</sub>Cp\*)<sub>2</sub> and of pure {*m*-(*E*)-BisIndSB}(ZrCl<sub>2</sub>Cp\*)<sub>2</sub>.  
**Figure S16.** <sup>1</sup>H NMR spectrum (CD<sub>2</sub>Cl<sub>2</sub>) of a mixture of (*Z*)- and (*E*)-{*m*-BisIndSB}(ZrCl<sub>2</sub>Cp\*)<sub>2</sub>.  
**Figure S17.** <sup>13</sup>C{<sup>1</sup>H} NMR spectrum of a mixture of (*Z*)- and (*E*)-{*m*-BisIndSB}(ZrCl<sub>2</sub>Cp\*)<sub>2</sub>.  
**Figure S18.** <sup>1</sup>H-<sup>13</sup>C HSQC NMR spectrum of a mixture of (*Z*)- and (*E*)-{*m*-BisIndSB}(ZrCl<sub>2</sub>Cp\*)<sub>2</sub>.  
**Figure S19.** <sup>1</sup>H NMR spectrum (400 MHz, C<sub>6</sub>D<sub>6</sub>, 23 °C) of {*p*-(*E*)-BisIndSB}(ZrCl<sub>2</sub>Cp\*)<sub>2</sub>.  
**Figure S20.** <sup>13</sup>C{<sup>1</sup>H} NMR spectrum of {*p*-(*E*)-BisIndSB}(ZrCl<sub>2</sub>Cp\*)<sub>2</sub>.  
**Figure S21.** <sup>1</sup>H-<sup>13</sup>C HSQC NMR spectrum of {*p*-(*E*)-BisIndSB}(ZrCl<sub>2</sub>Cp\*)<sub>2</sub>.  
**Figure S22.** <sup>1</sup>H-<sup>13</sup>C HMBC NMR spectrum of {*p*-(*E*)-BisIndSB}(ZrCl<sub>2</sub>Cp\*)<sub>2</sub>.  
**Figure S23.** <sup>1</sup>H NMR spectrum of {*p*-(*Z*)-BisIndSB}(ZrCl<sub>2</sub>Cp\*)<sub>2</sub>.  
**Figure S24.** <sup>1</sup>H-<sup>13</sup>C HSQC NMR of {*p*-(*Z*)-BisIndSB}(ZrCl<sub>2</sub>Cp\*)<sub>2</sub>.  
**Figure S25.** <sup>1</sup>H NMR spectrum of {*o*-(*E*)-BisIndSB}(Zr(NMe<sub>2</sub>)<sub>3</sub>)<sub>2</sub>.  
**Figure S26.** <sup>13</sup>C{<sup>1</sup>H} JMOD NMR spectrum of *o*-(*E*)-BisIndSB}(Zr(NMe<sub>2</sub>)<sub>3</sub>)<sub>2</sub>.

**Figure S27.**  $^1\text{H}$ - $^{13}\text{C}$  HSQC NMR spectrum of  $\{o\text{-}(E)\text{-BisIndSB}\}\text{Zr}(\text{NMe}_2)_3)_2$ .

**Figure S28.** DEPT 135  $^{13}\text{C}$  NMR spectrum of  $\{o\text{-}(E)\text{-BisIndSB}\}\text{Zr}(\text{NMe}_2)_3)_2$ .

**Figure S29.**  $^1\text{H}$  NMR spectrum of  $\{o\text{-}(Z)\text{-BisIndSB}\}\text{Zr}(\text{NMe}_2)_3)_2$ .

**Figure S30.**  $^{13}\text{C}\{^1\text{H}\}$  NMR spectrum of  $\{o\text{-}(Z)\text{-BisIndSB}\}\text{Zr}(\text{NMe}_2)_3)_2$ .

**Figure S31.**  $^1\text{H}$ - $^{13}\text{C}$  HSQC NMR spectrum of  $\{o\text{-}(Z)\text{-BisIndSB}\}\text{Zr}(\text{NMe}_2)_3)_2$ .

**Figure S32.** DEPT 135  $^{13}\text{C}$  NMR spectrum of  $\{o\text{-}(Z)\text{-BisIndSB}\}\text{Zr}(\text{NMe}_2)_3)_2$ .

**Figure S33.** Inert Atmospheric Solid Analysis Probe (iASAP) data for complexes  $\{o\text{-}(E/Z)\text{-BisIndSB}\}\text{Zr}(\text{NMe}_2)_3)_2$ .

**Figure S34.** Absorption spectra of  $\{o\text{-}(Z/E)\text{-BisIndSB}\}\text{H}_2$  proligands.

**Figure S35.** TD-DFT calculated absorption spectra of  $\{o\text{-}(Z/E)\text{-BisIndSB}\}\text{H}_2$  proligands.

**Figure S36.** Photoisomerization of  $(E)$ - to  $(Z)$ - $\{\text{BisIndSB}\}\text{H}_2$  proligands by UV irradiation.

**Figure S37.** Absorption spectra of  $(Z)$ - and  $(E)$ - $\{o\text{-BisIndSB}\}\text{Zr}(\text{NMe}_2)_3)_2$  complexes.

**Figure S38.** TD-DFT calculated absorption spectra of  $\{o\text{-}(E)\text{-}\{\text{BisIndSB}\}\text{Zr}(\text{NMe}_2)_3)_2$ .

**Figure S39.** Photosensitized stilbene isomerization (330 nm) of  $\{o\text{-}(Z)\text{-BisIndSB}\}\text{H}_2$  proligand by pyrene monitored by  $^1\text{H}$  NMR.

**Figure S40.** Photosensitized stilbene isomerization (350 nm) of  $\{o\text{-}(Z)\text{-BisIndSB}\}\text{H}_2$  proligand by pyrene monitored by  $^1\text{H}$  NMR.

**Figure S41.** Attempted photosensitized stilbene isomerization (450 nm) of  $\{o\text{-}(Z)\text{-BisIndSB}\}\text{H}_2$  proligand by perylene monitored by  $^1\text{H}$  NMR.

**Table S1.** Crystal data

### Preparation of mononuclear reference complexes for olefin polymerization

**Figure S42.**  $^1\text{H}$  NMR spectrum of  $(\eta^5\text{-2-methyl-4-phenyl-indenyl})(\eta^5\text{-pentamethylcyclopentadienyl})\text{ZrCl}_2$  (**mono-1**).

**Figure S43.** Inert Atmospheric Solid Analysis Probe (iASAP) data for  $(\eta^5\text{-2-methyl-4-phenyl-indenyl})\text{Zr}(\text{NMe}_2)_3$  (**mono-2**).

**Table S2.** Ethylene polymerization experiments performed with dinuclear complexes  $\{m/p\text{-}(E/Z)\text{-BisIndSB}\}\text{ZrCl}_2\text{Cp}^*)_2$  and the mononuclear reference complex  $(\eta^5\text{-2-methyl-4-phenyl-indenyl})(\eta^5\text{-pentamethylcyclopentadienyl})\text{ZrCl}_2$  (**mono-1**).

**Table S3.** 1-Hexene polymerization experiments performed with dinuclear complexes  $\{m/p\text{-}(E/Z)\text{-BisIndSB}\}\text{ZrCl}_2\text{Cp}^*)_2$  and the mononuclear reference complex  $(\eta^5\text{-2-methyl-4-phenyl-indenyl})(\eta^5\text{-pentamethylcyclopentadienyl})\text{ZrCl}_2$  (**mono-1**).

**Table S4.** Ethylene/1-hexene copolymerization experiments performed with dinuclear complexes  $\{m/p\text{-}(E/Z)\text{-BisIndSB}\}\text{ZrCl}_2\text{Cp}^*)_2$  and the mononuclear reference complex  $(\eta^5\text{-2-methyl-4-phenyl-indenyl})(\eta^5\text{-pentamethylcyclopentadienyl})\text{ZrCl}_2$  (**mono-1**).

**Table S5.** Ethylene polymerization experiments performed with dinuclear complexes  $\{o\text{-}(E/Z)\text{-BisIndSB}\}\text{Zr}(\text{NMe}_2)_3)_2$  and the mononuclear reference complex  $(\eta^5\text{-2-methyl-4-phenyl-indenyl})\text{Zr}(\text{NMe}_2)_3$  (**mono-2**).

**Table S6.** Ethylene/1-hexene copolymerization experiments performed with dinuclear complexes  $\{o\text{-}(E/Z)\text{-BisIndSB}\}\text{Zr}(\text{NMe}_2)_3)_2$  and the mononuclear reference complex  $(\eta^5\text{-2-methyl-4-phenyl-indenyl})\text{Zr}(\text{NMe}_2)_3$  (**mono-2**).

**Figure S44.** Representative DSC traces of polyethylene samples corresponding to a) NR2082, b) NR2080, c) NR2146, d) NR2143, e) NR2137, f) NR2128, g) NR2130 entries from Table S2.

**Figure S45.** Representative DSC traces of ethylene / 1-hexene copolymer samples corresponding to a) NR2074, b) NR2077, c) NR2087, d) NR2149, e) NR2150, f) NR2141, g) NR2142, h) NR2132 and i) entries from Table S4.

**Figure S46.** Representative Size Exclusion Chromatography traces of polyethylene and ethylene / 1-hexene copolymer samples. a) Entry NR2108 from Table S2, b) Entry NR2130 from Table S2, c) Entry NR2132 from Table S4, d) Entry NR2133 from Table S4, e) Entry NR2137 from Table S2, f) Entry NR2141 from Table S4, g) Entry NR2142 from Table S4, h) Entry NR2146 from Table S2, i) Entry NR2149 from Table S4, j) Entry NR2150 from Table S4.

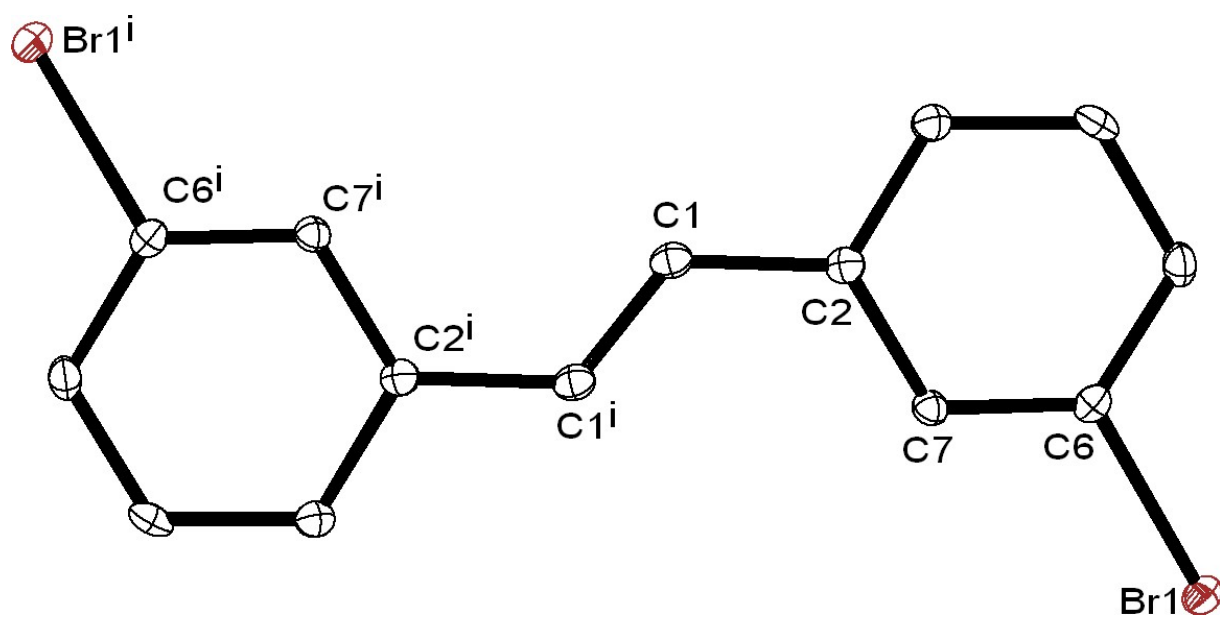

**Figure S1.** ORTEP plot of the solid-state molecular structure of (*E*)-3,3'-dibromostilbene (ellipsoids set at 50% probability level; all H atoms omitted for clarity). Selected bond distances (Å) and angles (°): C1–C1', 1.319(8); C6–Br1, 1.902(4); C2–C1, 1.468(5); C2–C1–C1'–C2, 180.0.

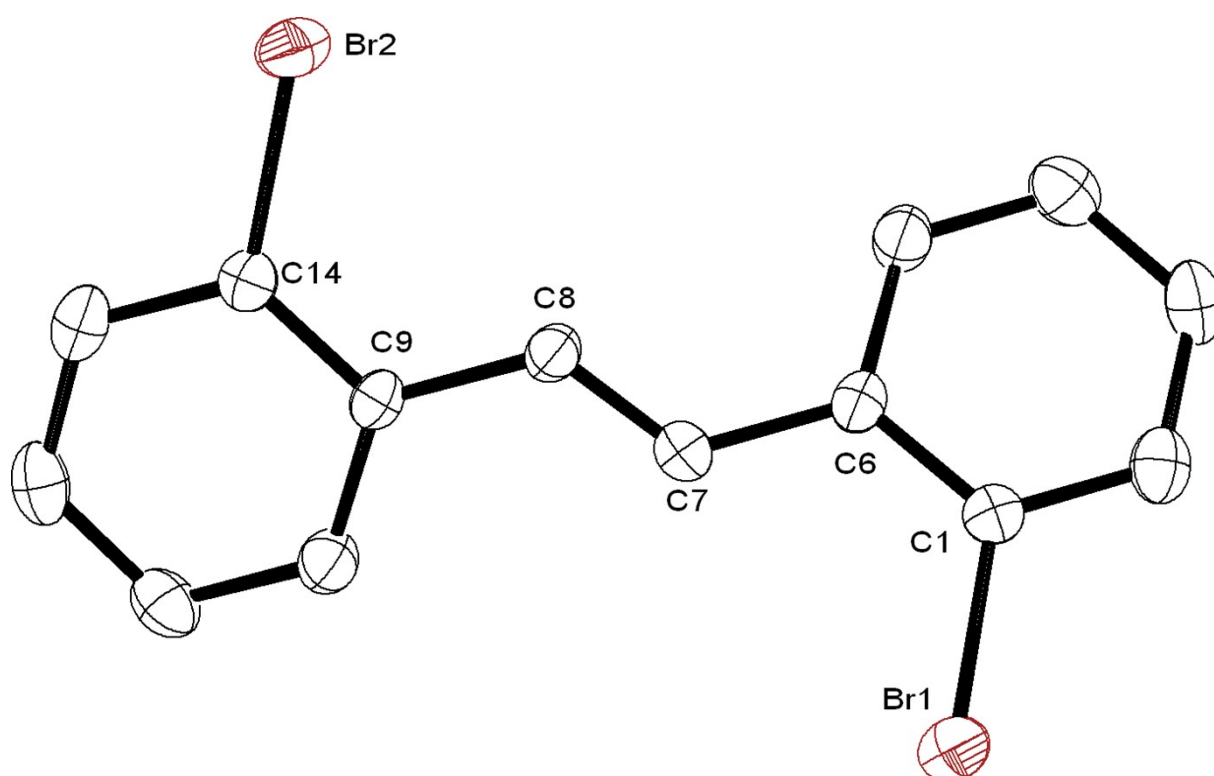

**Figure S2.** ORTEP plot of the solid-state molecular structure of (*E*)-2,2'-dibromostilbene (ellipsoids set at 50% probability level; all H atoms omitted for clarity). Selected bond distances (Å) and angles (°): C7–C8, 1.303(5); C1–Br1, 1.892(4); C6–C7, 1.460(5); C6–C7–C8–C9, 175.0(4).

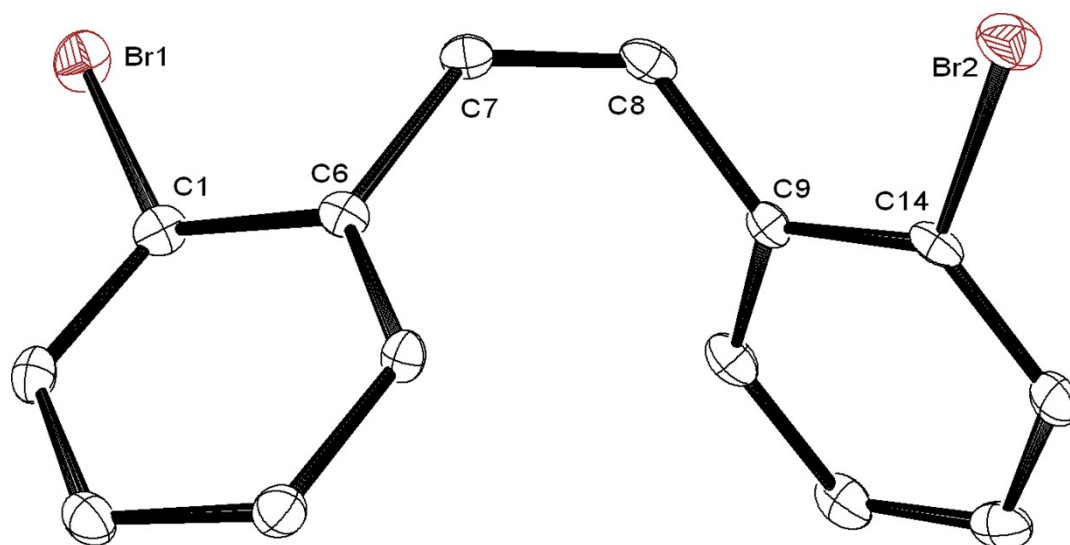

**Figure S3.** ORTEP plot of the solid-state molecular structure of (*Z*)-2,2'-dibromostilbene (ellipsoids set at 50% probability level; all H atoms omitted for clarity) (only one of the two independent molecules is depicted). Selected bond distances (Å) and angles (°): C7–C8, 1.333(4); C1–Br1, 1.912(3); C6–C7, 1.473(4); C6–C7–C8–C9, –8.0(5).

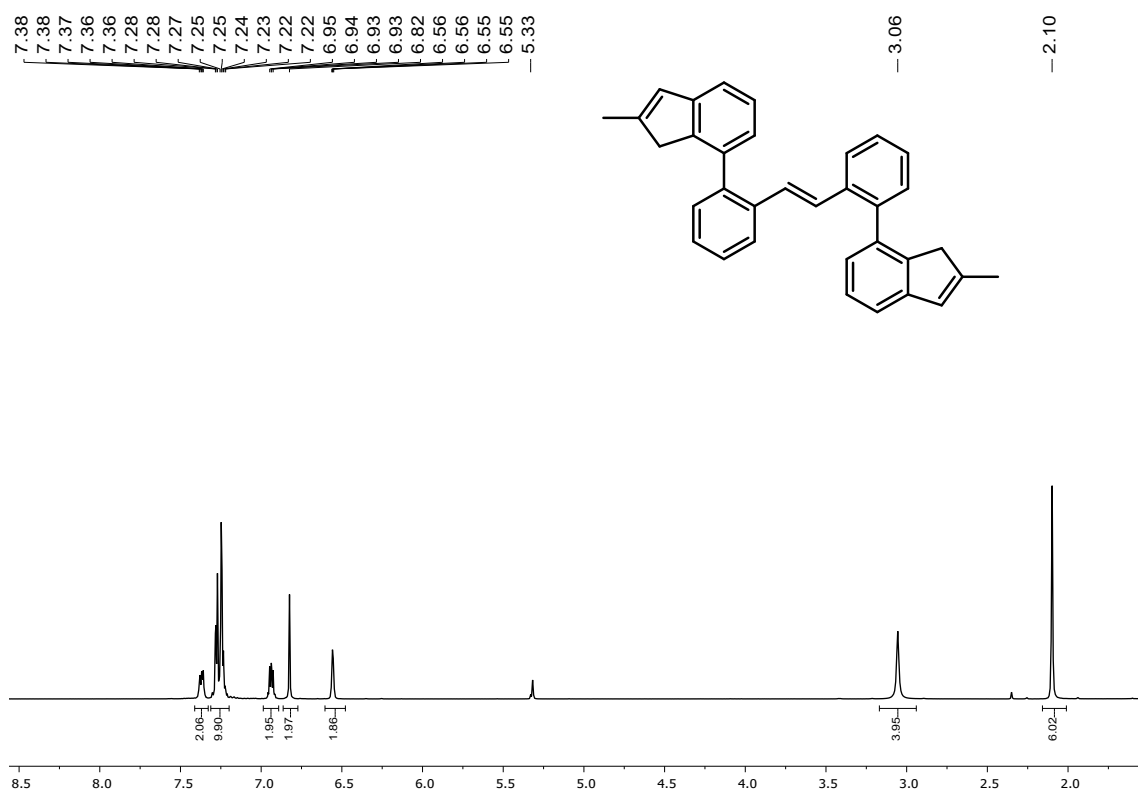

**Figure S4.** <sup>1</sup>H NMR spectrum (400 MHz, CD<sub>2</sub>Cl<sub>2</sub>, 23 °C) of {*o*-(*E*)-BisIndSB}<sub>2</sub>H<sub>2</sub>.

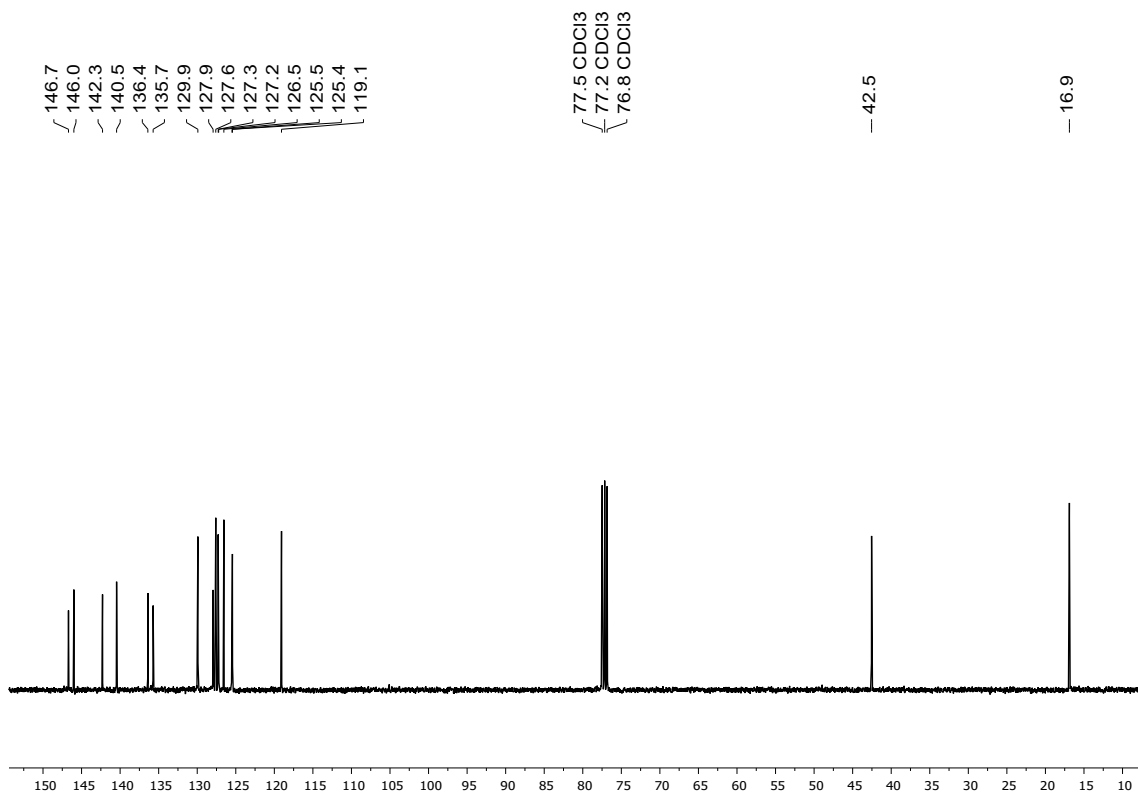

**Figure S5.** <sup>13</sup>C {<sup>1</sup>H} NMR spectrum (101 MHz, CD<sub>2</sub>Cl<sub>2</sub>, 23 °C) of {*o*-(*E*)-BisIndSB}<sub>2</sub>H<sub>2</sub>.

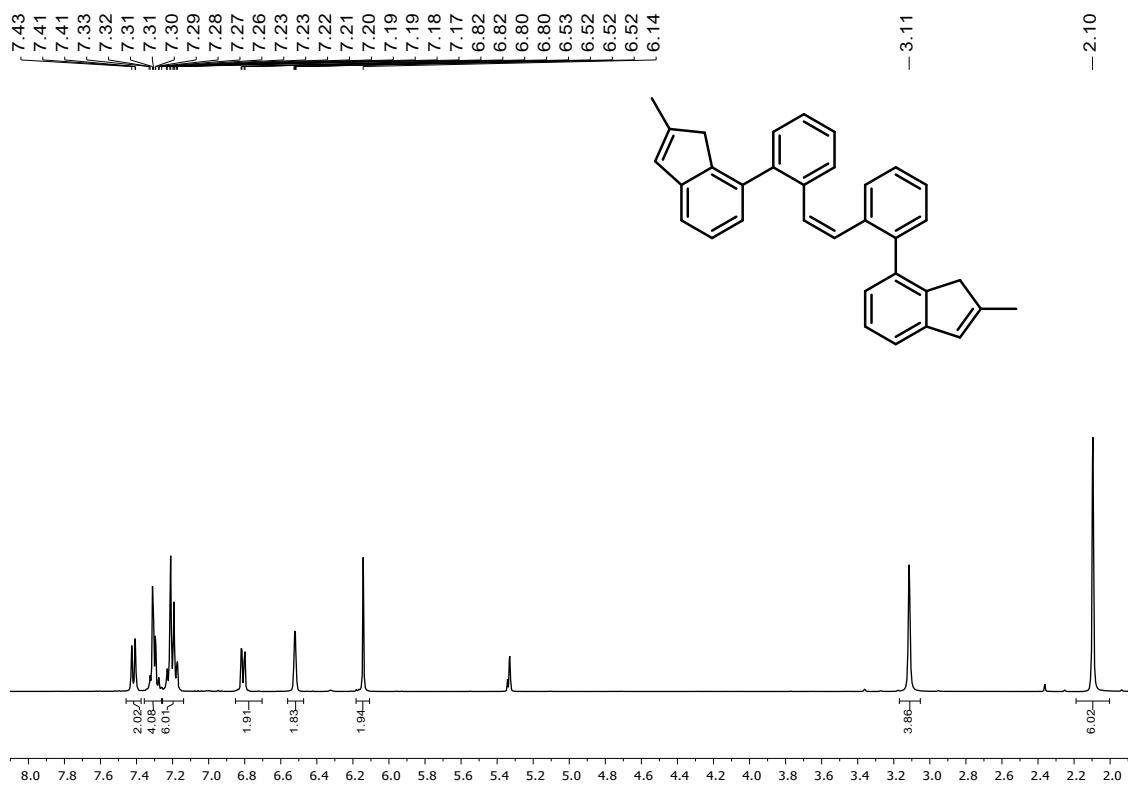

**Figure S6.**  $^1\text{H NMR}$  spectrum (400 MHz,  $\text{CD}_2\text{Cl}_2$ , 23 °C) of  $\{o\text{-(Z)-BisIndSB}\}_2$ .

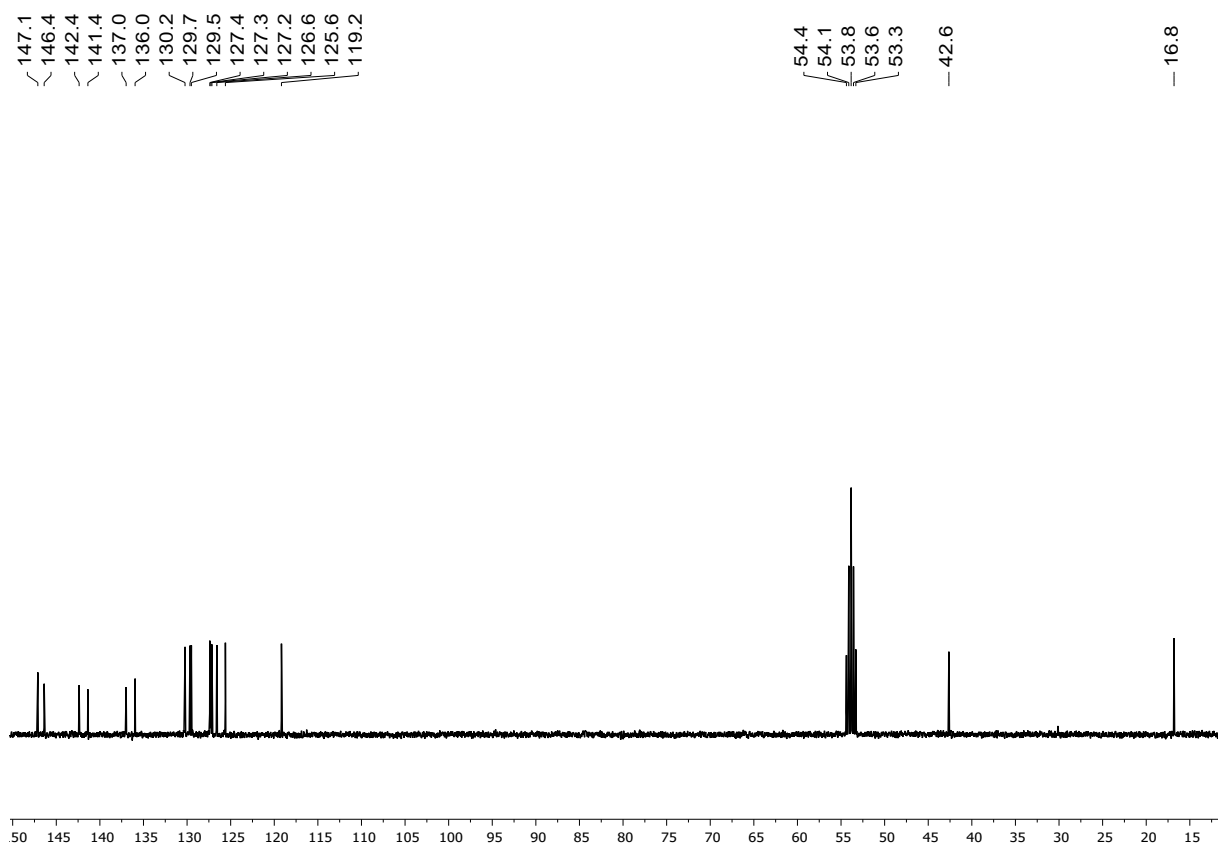

**Figure S7.**  $^{13}\text{C}\{^1\text{H}\}$  NMR spectrum (101 MHz,  $\text{CD}_2\text{Cl}_2$ , 23 °C) of  $\{o\text{-(Z)-BisIndSB}\}_2$ .

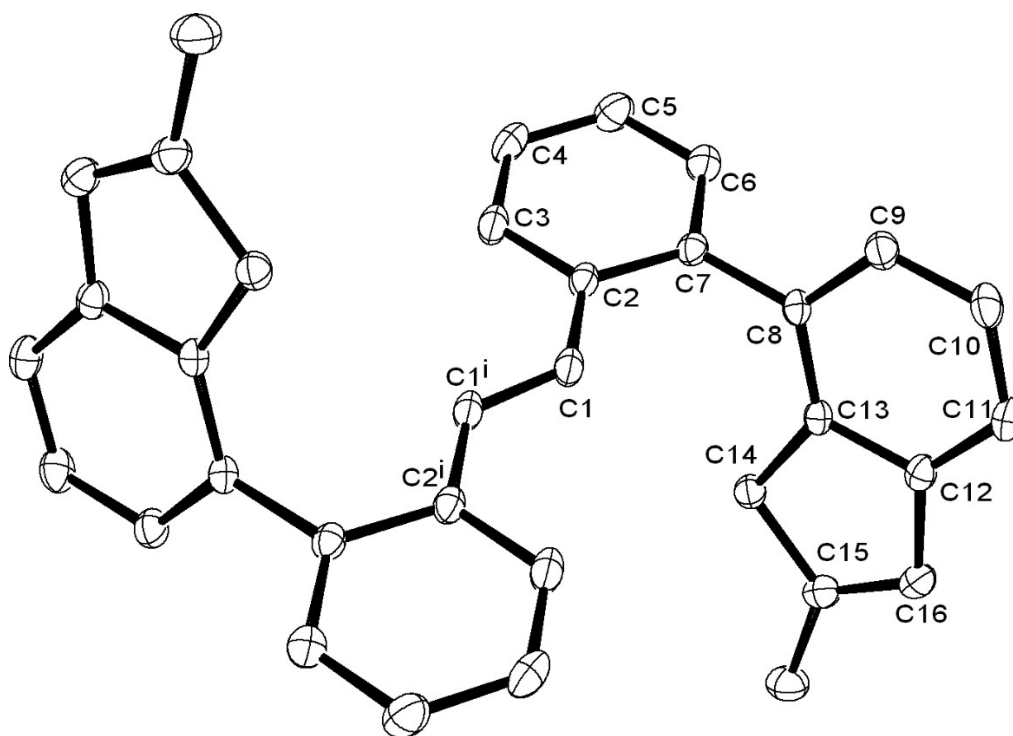

**Figure S8.** ORTEP plot of the solid-state molecular structure of  $\{o\text{-}(E)\text{-BisIndSB}\}_2\text{H}_2$  (ellipsoids set at 50% probability level; all H atoms omitted for clarity). Selected bond distances ( $\text{\AA}$ ) and angles ( $^\circ$ ): C1–C1', 1.323(3); C1–C2, 1.466(2); C2–C1–C1'–C2, 180.0; C2–C7–C8–C13,  $-68.95(18)$ .

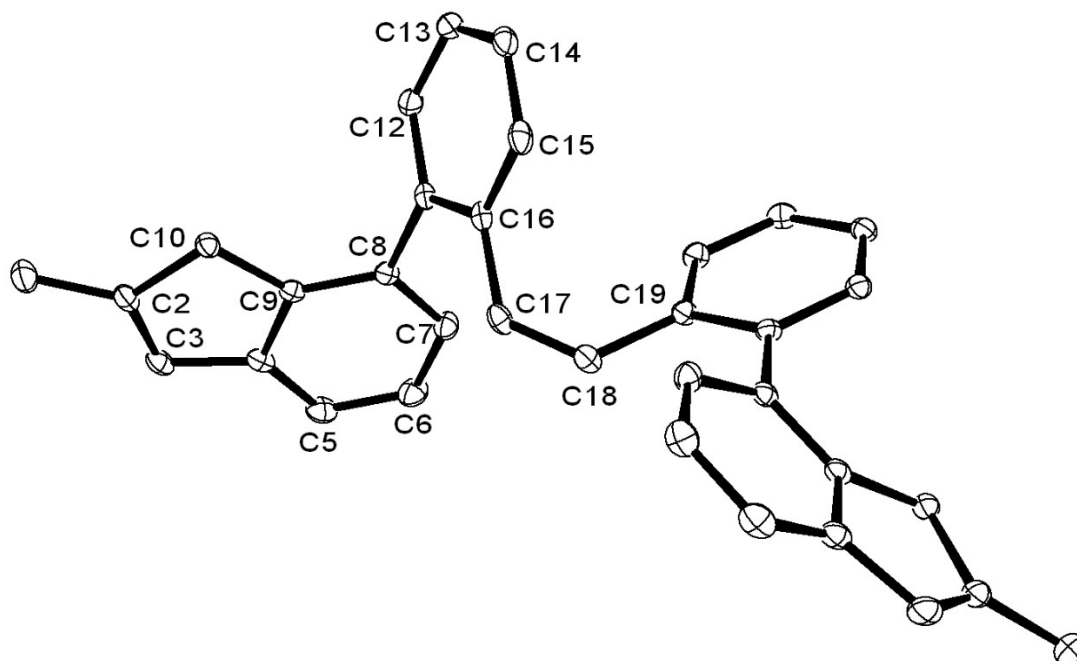

**Figure S9.** ORTEP plot of the solid-state molecular structure of  $\{o\text{-}(Z)\text{-BisIndSB}\}_2\text{H}_2$  (ellipsoids set at 50% probability level; all H atoms omitted for clarity). Selected bond distances ( $\text{\AA}$ ) and angles ( $^\circ$ ): C17–C18, 1.332(2); C16–C17, 1.485(2); C16–C17–C18–C19,  $-9.8(2)$ ; C16–C11–C8–C9,  $112.22(15)$ .



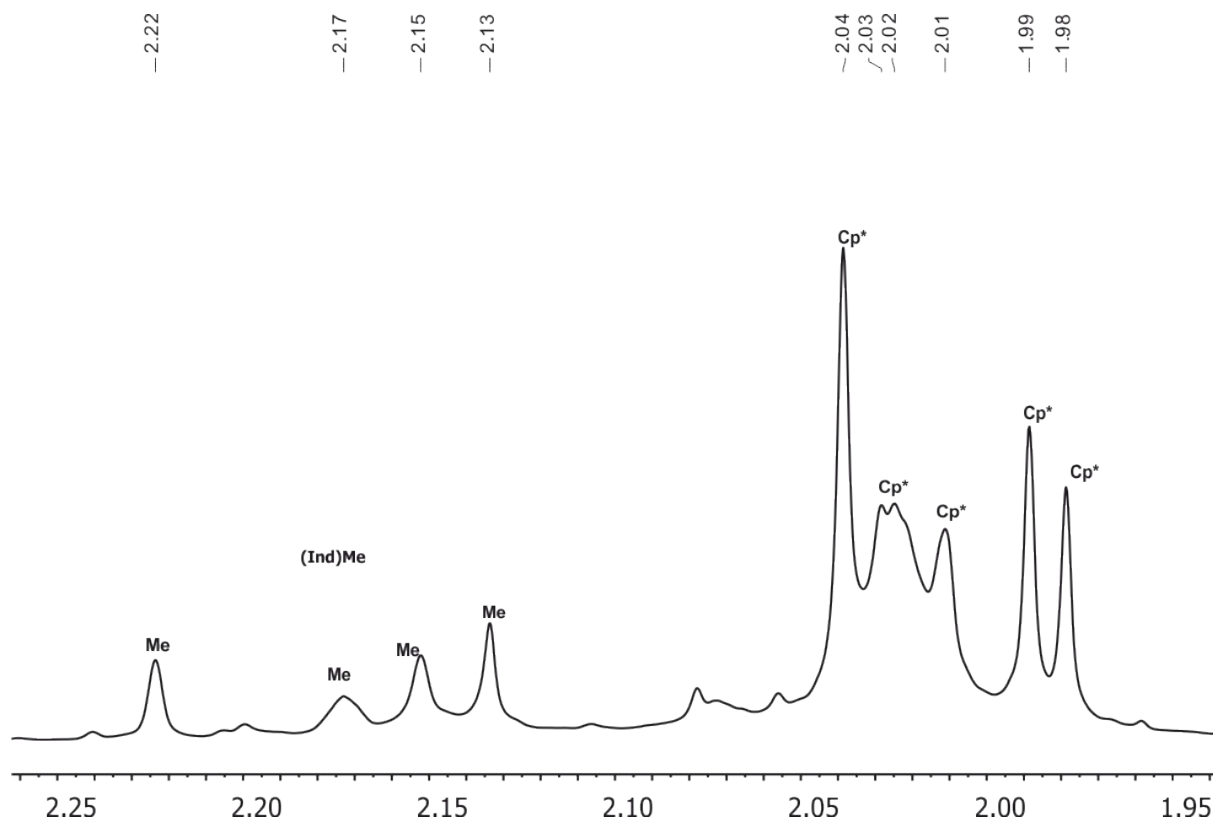

**Figure S10.** Detail of the aliphatic region of the <sup>1</sup>H NMR spectrum (400 MHz, CDCl<sub>3</sub>, 23 °C) of {*o*-(*Z*)-BisIndSB}(ZrCl<sub>2</sub>Cp\*)<sub>2</sub>.

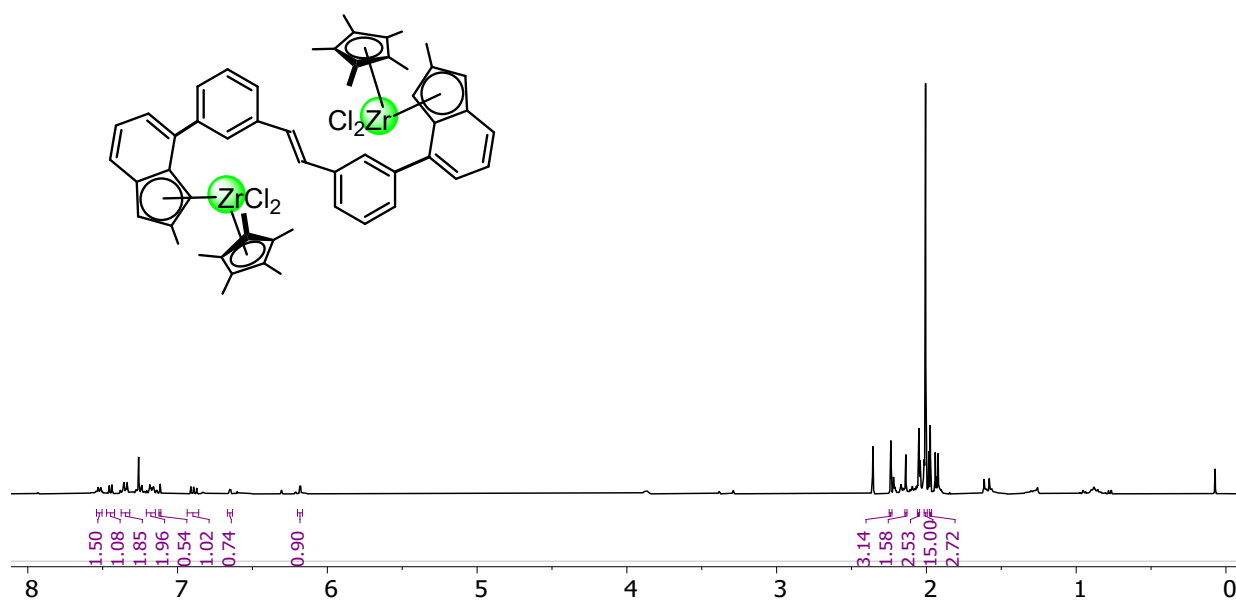

**Figure S11.**  $^1\text{H}$  NMR spectrum (400 MHz,  $\text{CDCl}_3$ , 23 °C) of  $\{m\text{-}(E)\text{-BisIndSB}\}(\text{ZrCl}_2\text{Cp}^*)_2$ .

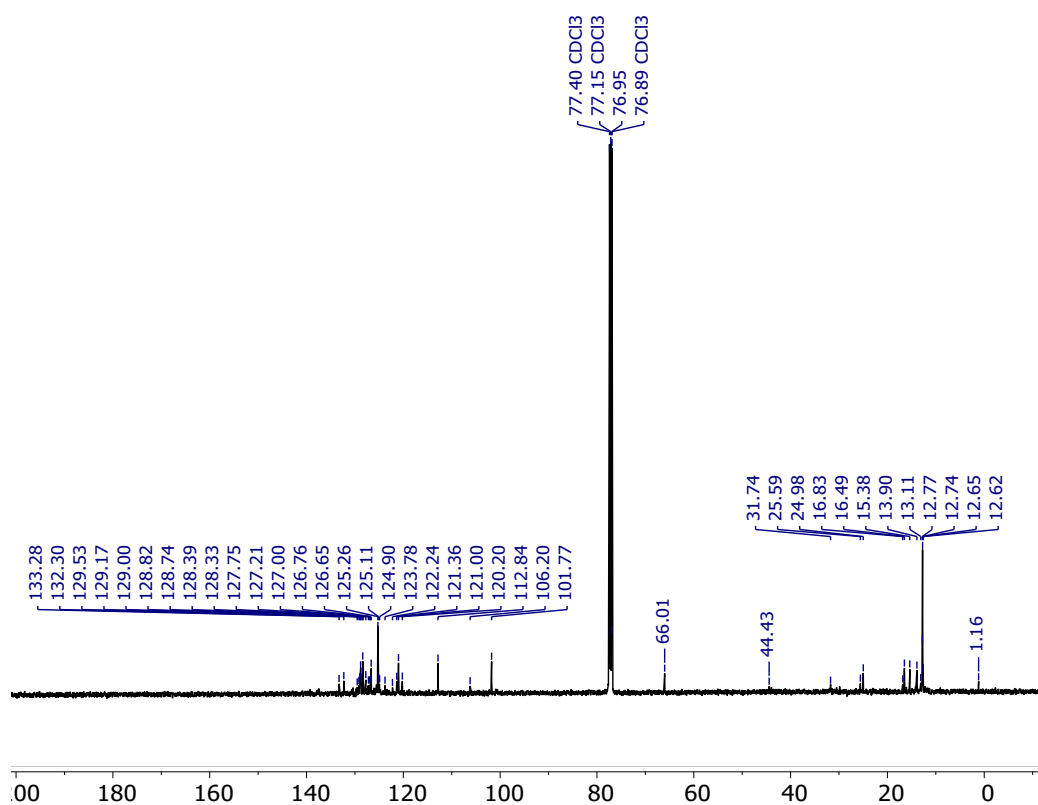

**Figure S12.**  $^{13}\text{C}\{^1\text{H}\}$  NMR spectrum (101 MHz,  $\text{CDCl}_3$ , 23 °C) of  $\{m\text{-}(E)\text{-BisIndSB}\}(\text{ZrCl}_2\text{Cp}^*)_2$ .

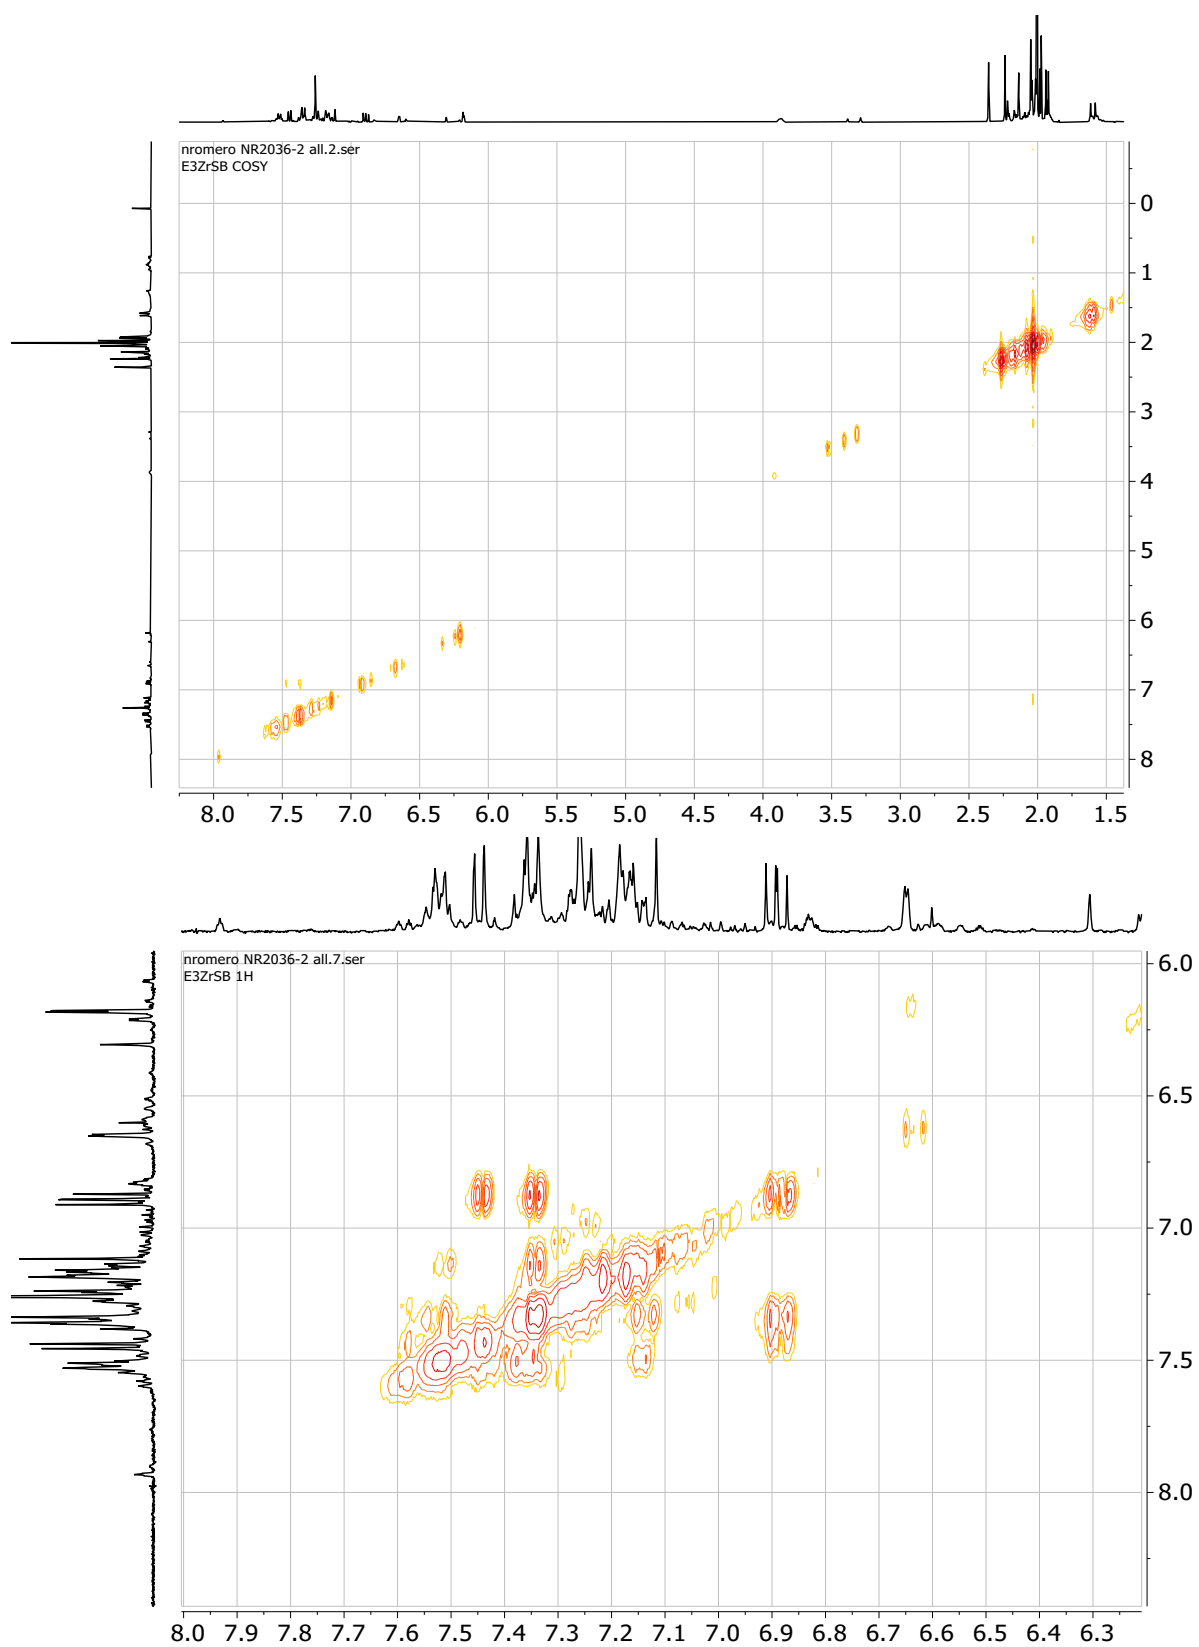

**Figure S13.**  $^1\text{H}$ - $^1\text{H}$  COSY NMR spectrum (400 MHz,  $\text{CDCl}_3$ , 23  $^\circ\text{C}$ ) of  $\{m\text{-}(E)\text{-BisIndSB}\}(\text{ZrCl}_2\text{Cp}^*)_2$ .

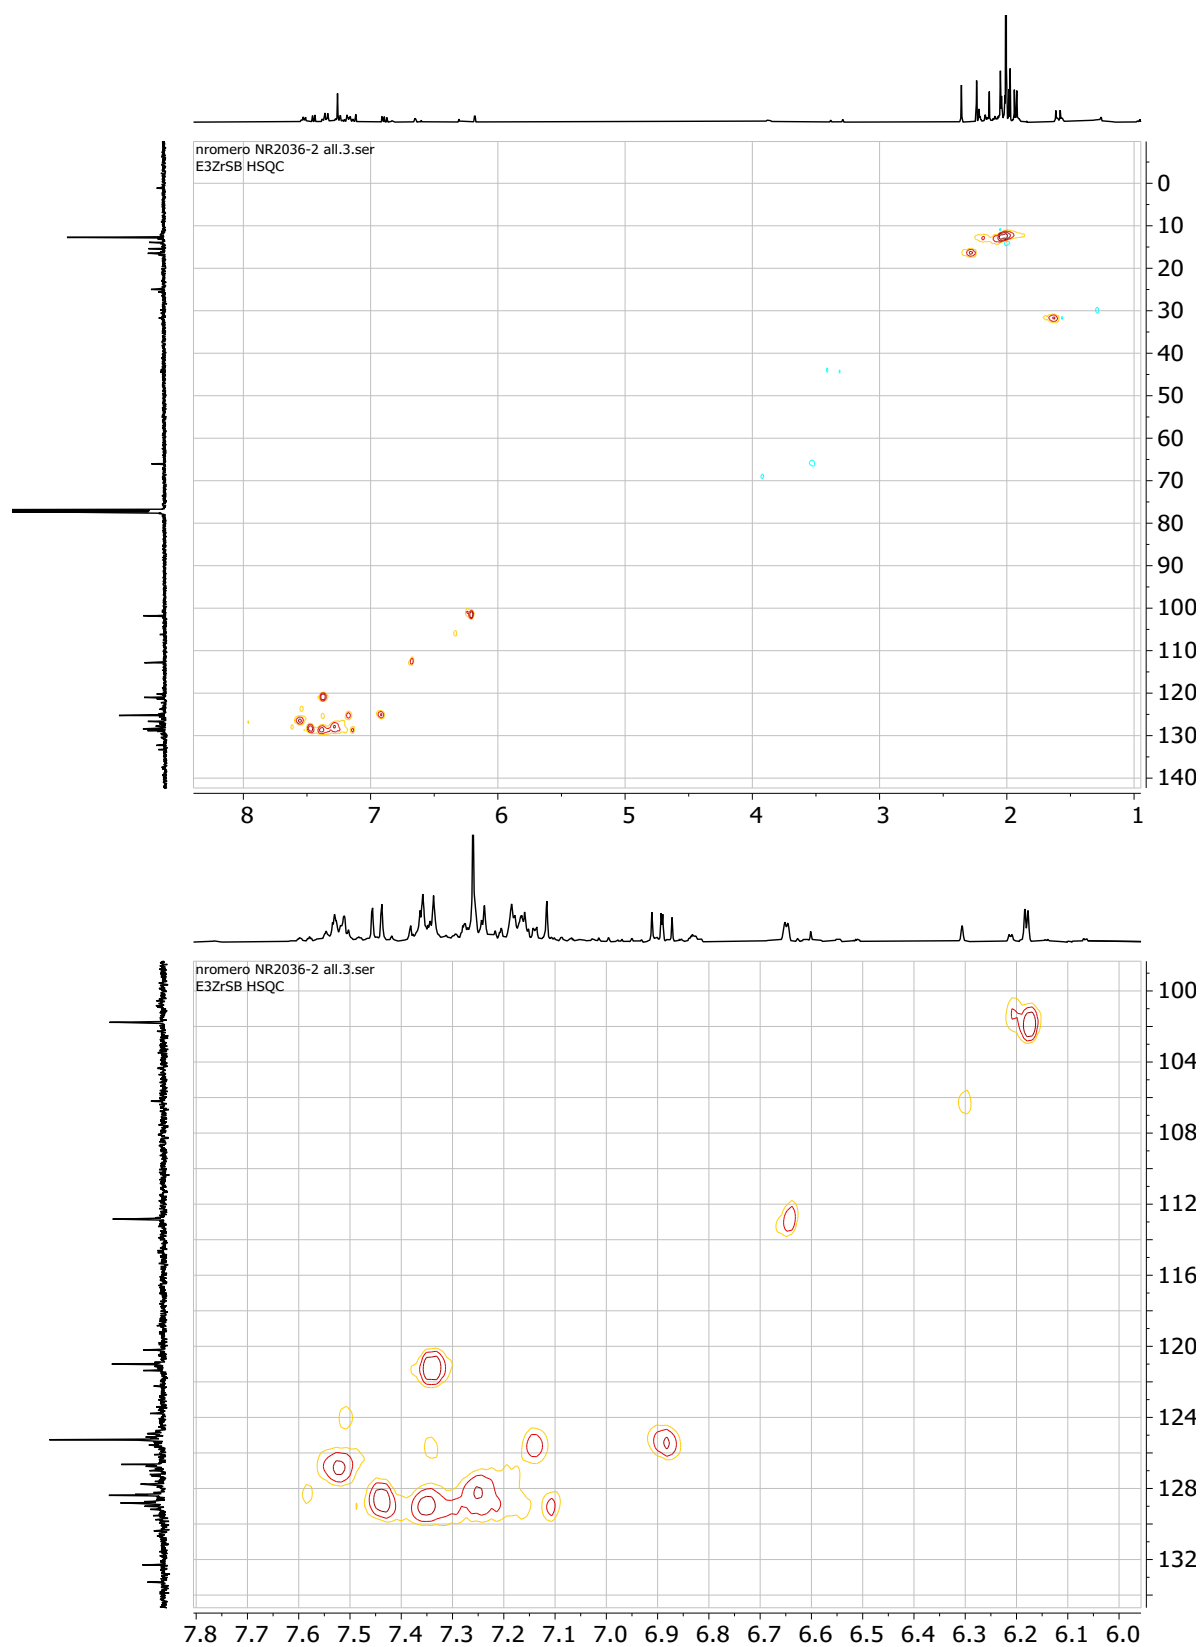

**Figure S14.**  $^1\text{H}$ - $^{13}\text{C}$  HSQC NMR spectrum (100 MHz,  $\text{CDCl}_3$ , 23  $^\circ\text{C}$ ) of  $\{m\text{-(E)-BisIndSB}\}(\text{ZrCl}_2\text{Cp}^*)_2$ .

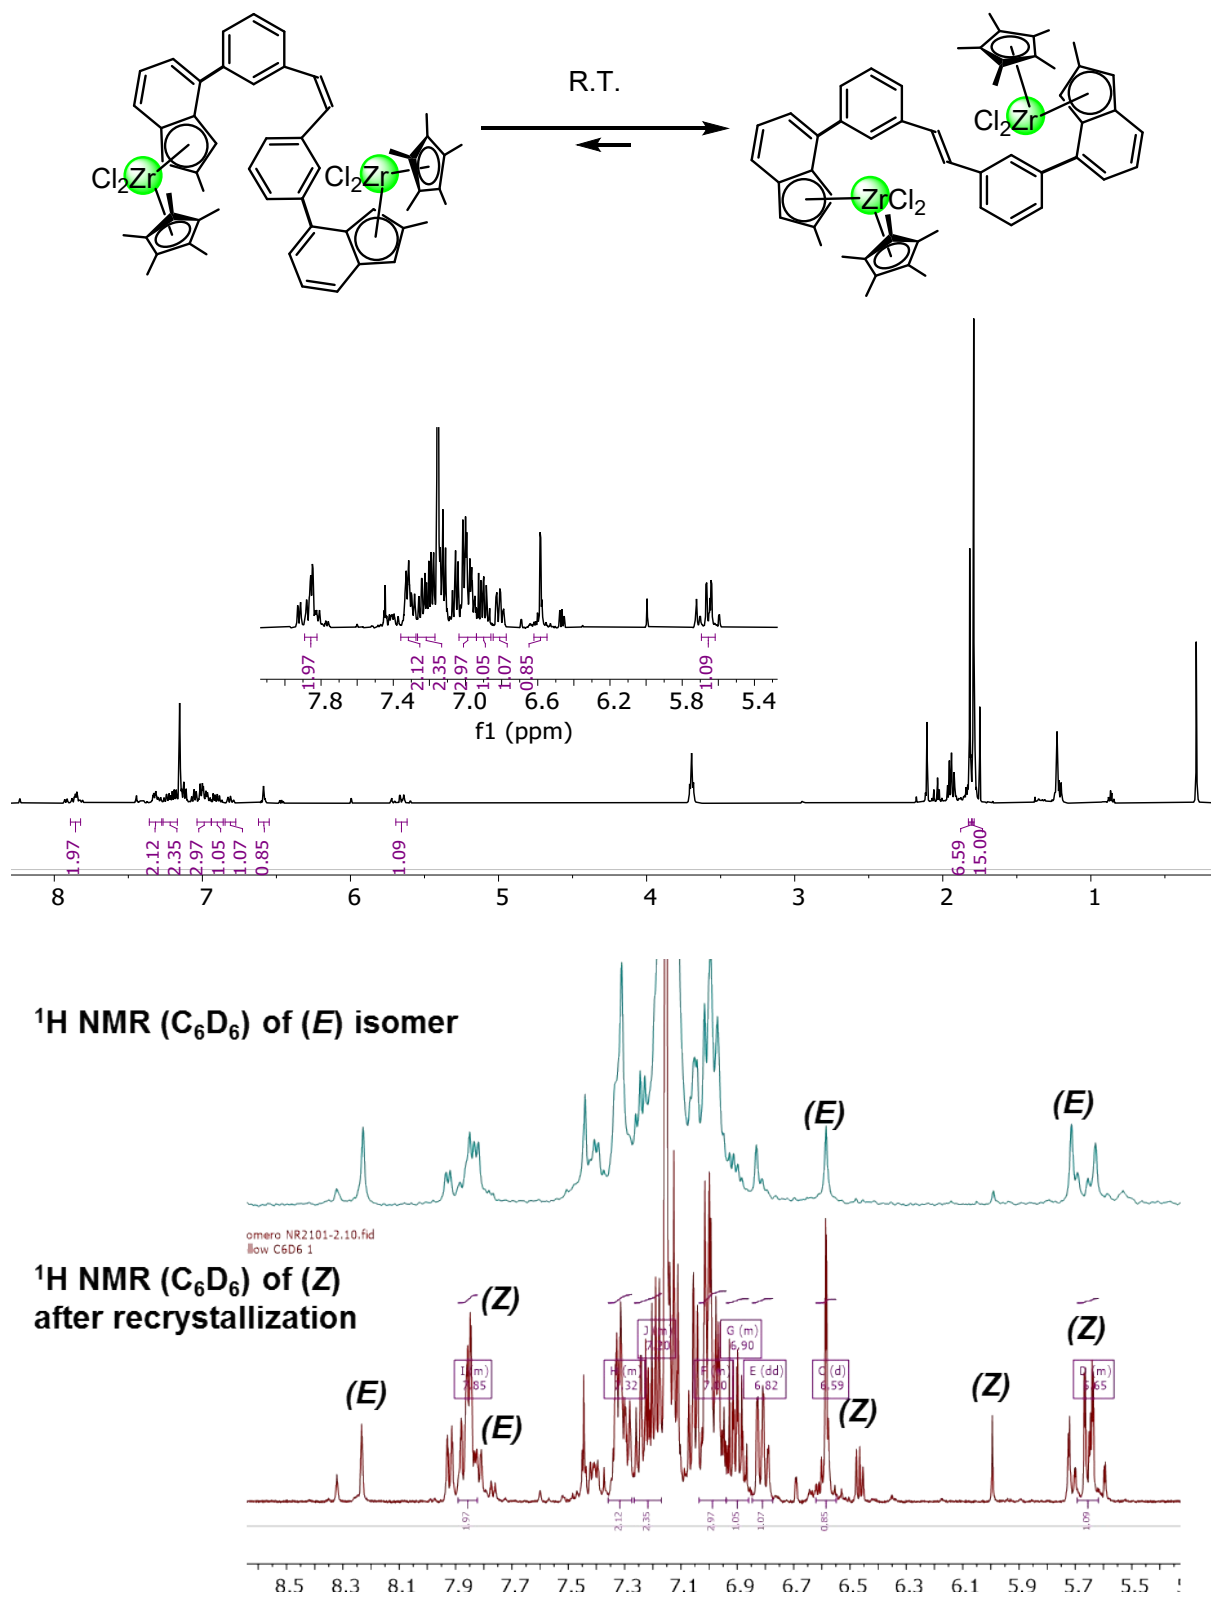

**Figure S15.**  $^1\text{H NMR}$  spectra (400 MHz,  $\text{C}_6\text{D}_6$ , 23  $^\circ\text{C}$ ) of (top): a mixture of  $(Z)$ - and  $(E)$ - $\{m\text{-BisIndSB}\}(\text{ZrCl}_2\text{Cp}^*)_2$  obtained after recrystallization of the reaction mixture and (bottom): comparison of the mixture with pure  $\{m\text{-}(E)\text{-BisIndSB}\}(\text{ZrCl}_2\text{Cp}^*)_2$ .

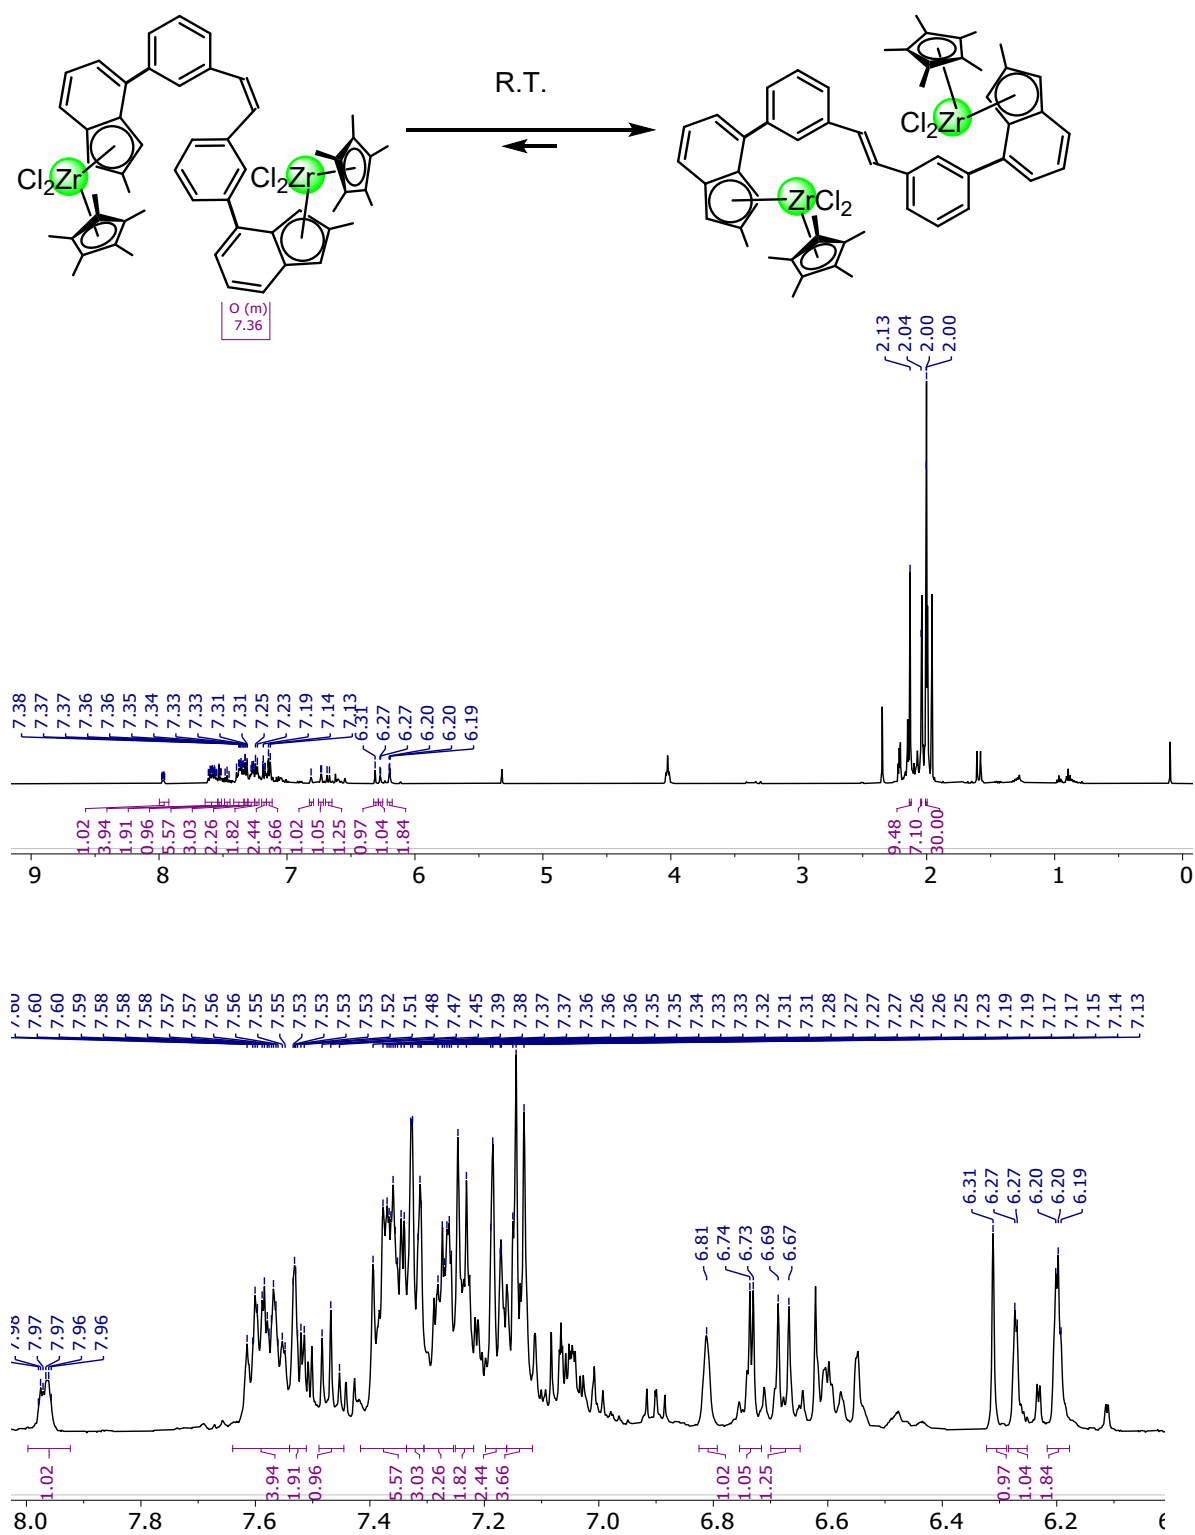

**Figure S16.**  $^1H$  NMR spectrum (400 MHz,  $CD_2Cl_2$ , 23 °C) of a mixture of  $(Z)$ - and  $(E)$ - $\{m\text{-BisIndSB}\}(ZrCl_2Cp^*)_2$ .

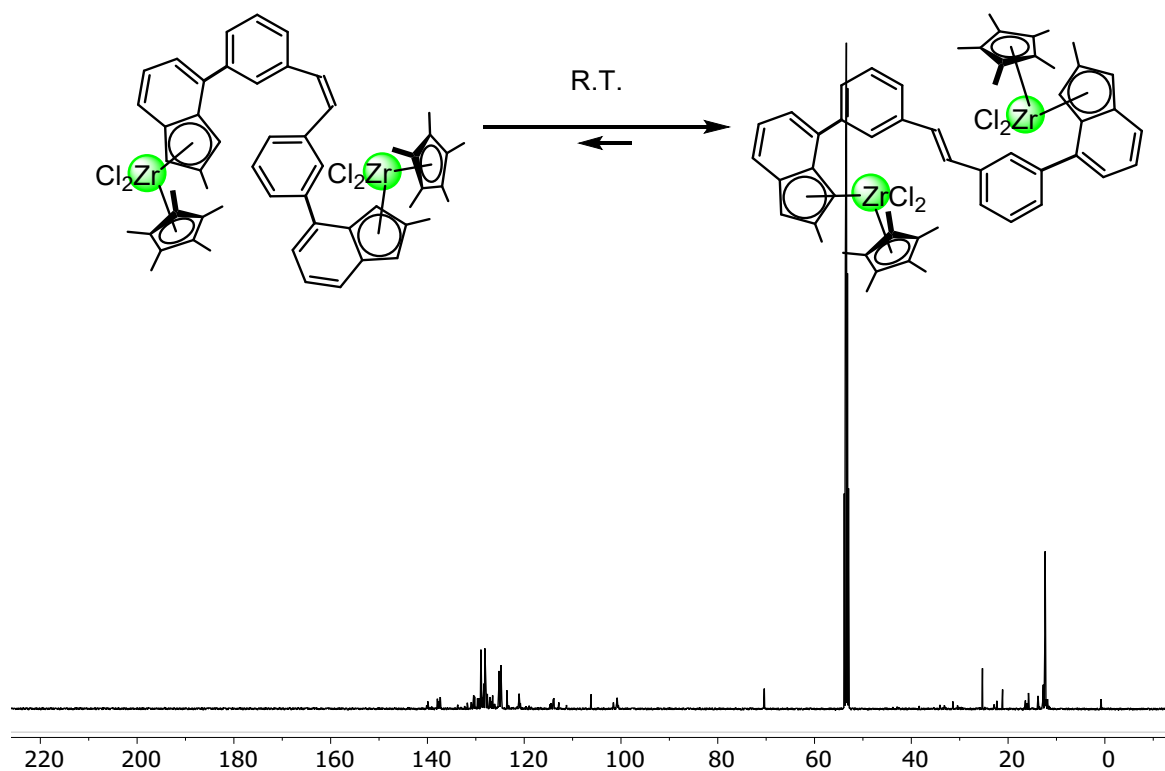

**Figure S17.**  $^{13}\text{C}\{^1\text{H}\}$  NMR spectrum (101 MHz,  $\text{CD}_2\text{Cl}_2$ , 23 °C) of a mixture of (*Z*)- and (*E*)-*m*-{BisIndSB}(ZrCl<sub>2</sub>Cp\*)<sub>2</sub>.

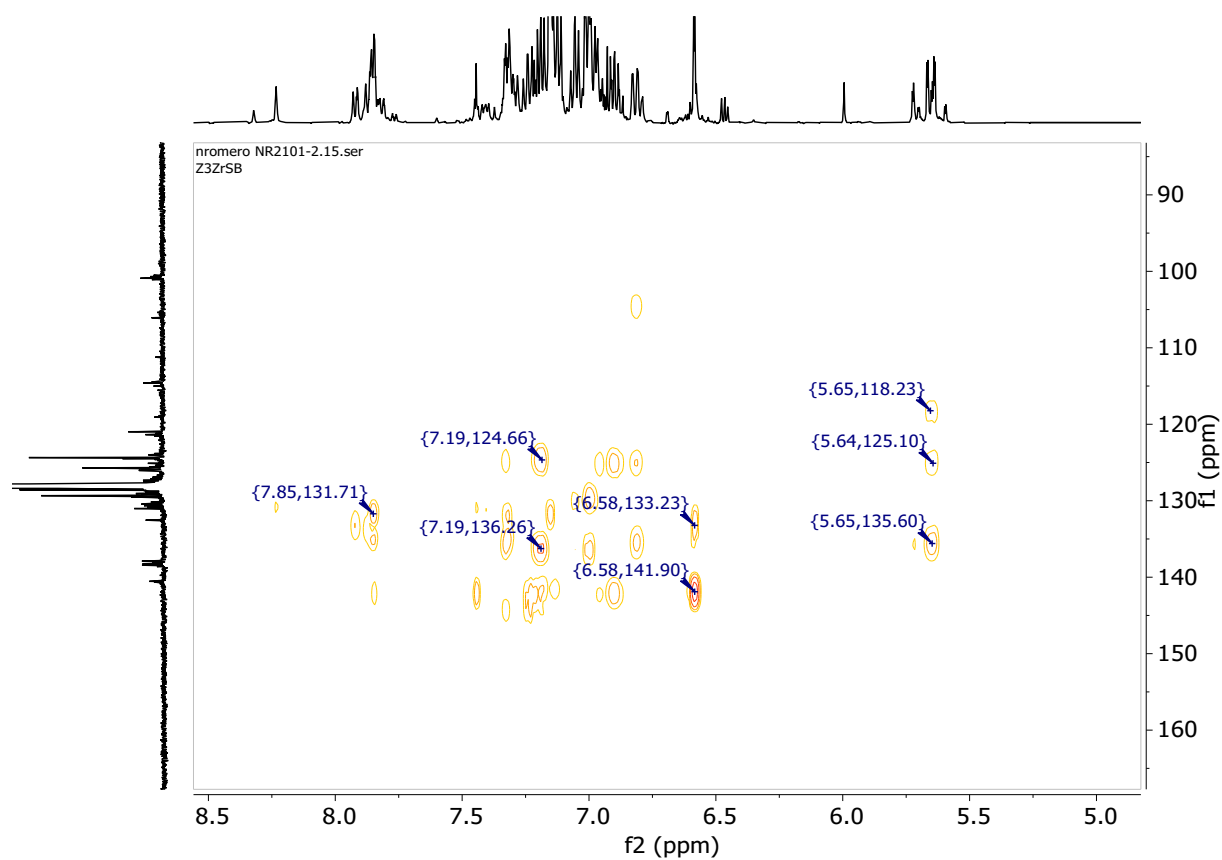

**Figure S18.**  $^1\text{H}$ - $^{13}\text{C}$  HSQC NMR spectrum (100 MHz,  $\text{CD}_2\text{Cl}_2$ , 23 °C) of a mixture of (*Z*)- and (*E*)-*m*-{BisIndSB}(ZrCl<sub>2</sub>Cp\*)<sub>2</sub>.

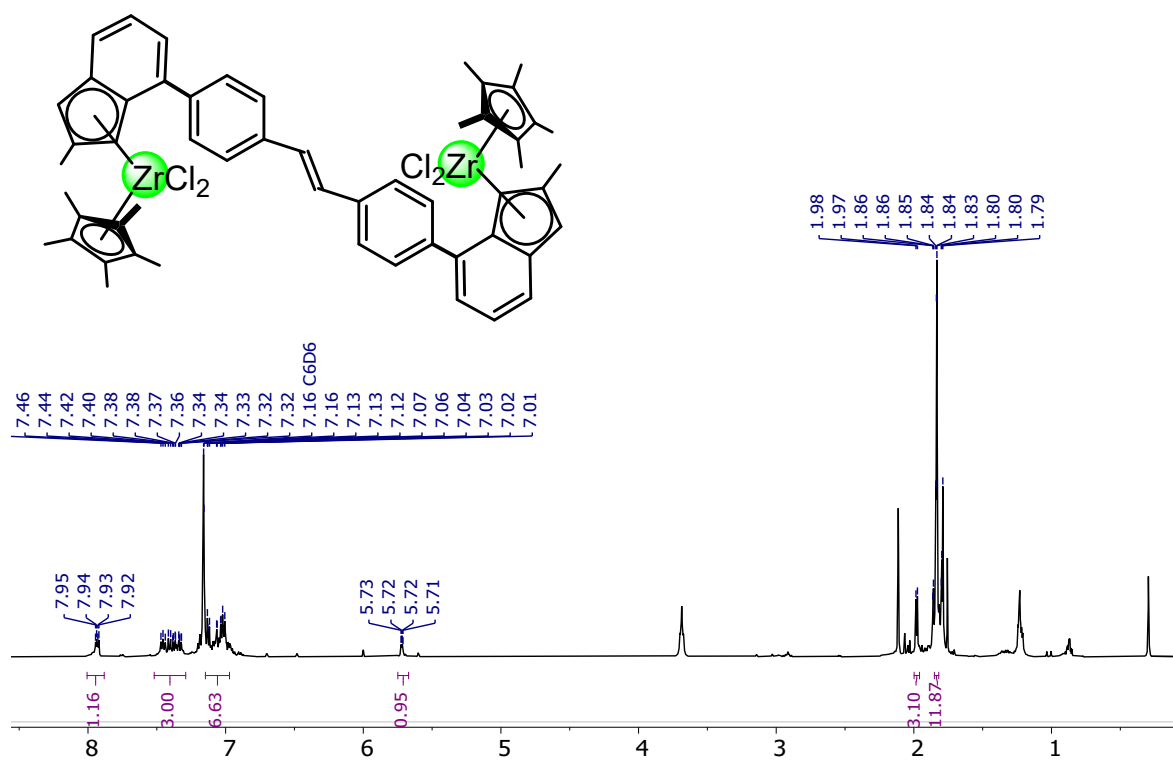

**Figure S19.**  $^1\text{H}$  NMR spectrum (400 MHz,  $\text{C}_6\text{D}_6$ , 23 °C) of  $\{p\text{-}(E)\text{-BisIndSB}\}(\text{ZrCl}_2\text{Cp}^*)_2$ .

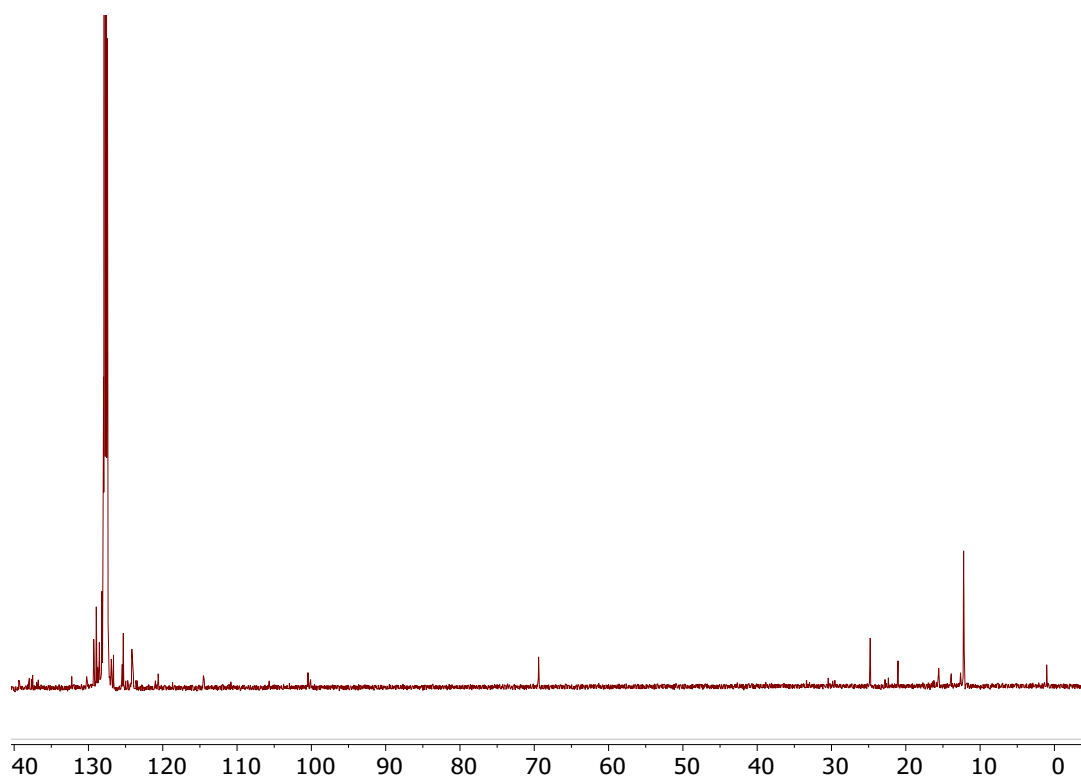

**Figure S20.**  $^{13}\text{C}\{^1\text{H}\}$  NMR spectrum (101 MHz,  $\text{C}_6\text{D}_6$ , 23 °C) of  $\{p\text{-}(E)\text{-BisIndSB}\}(\text{ZrCl}_2\text{Cp}^*)_2$ .



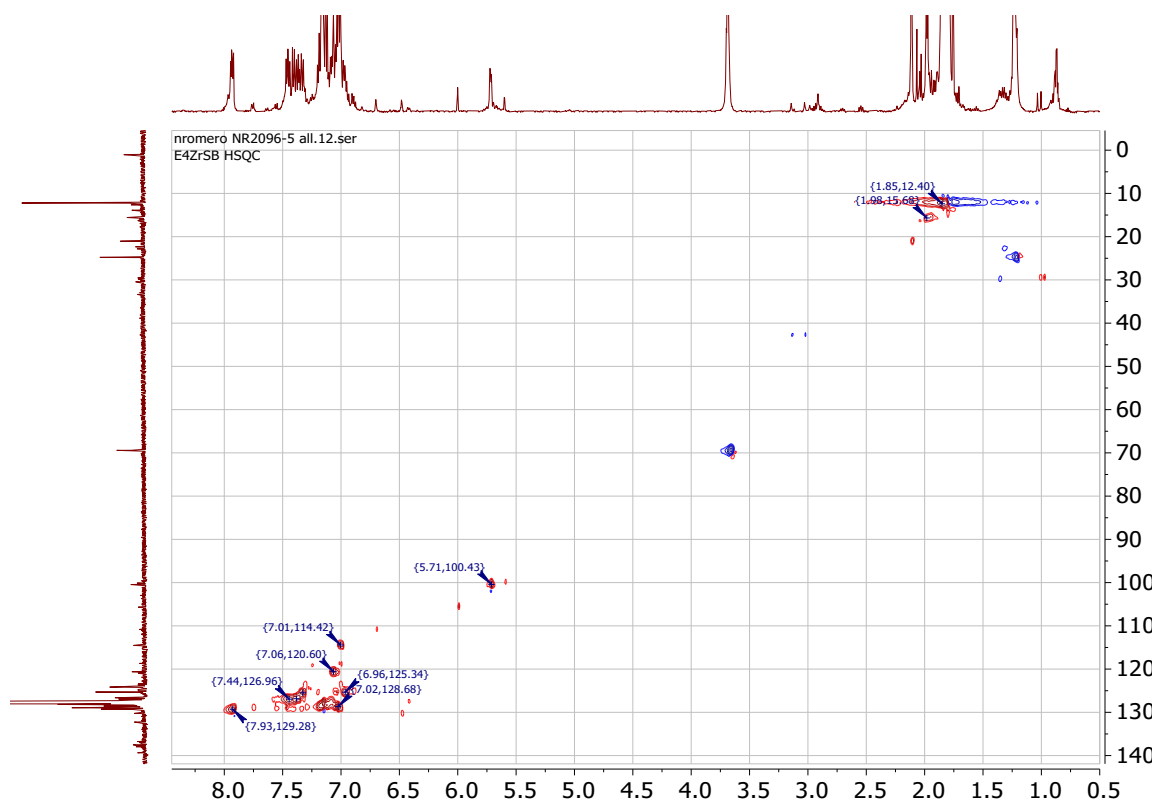

**Figure S21.**  $^1\text{H}$ - $^{13}\text{C}$  HSQC NMR spectrum (100 MHz,  $\text{C}_6\text{D}_6$ , 23 °C) of  $\{p\text{-}(E)\text{-BisInd}\}(\text{ZrCl}_2\text{Cp}^*)_2$ .

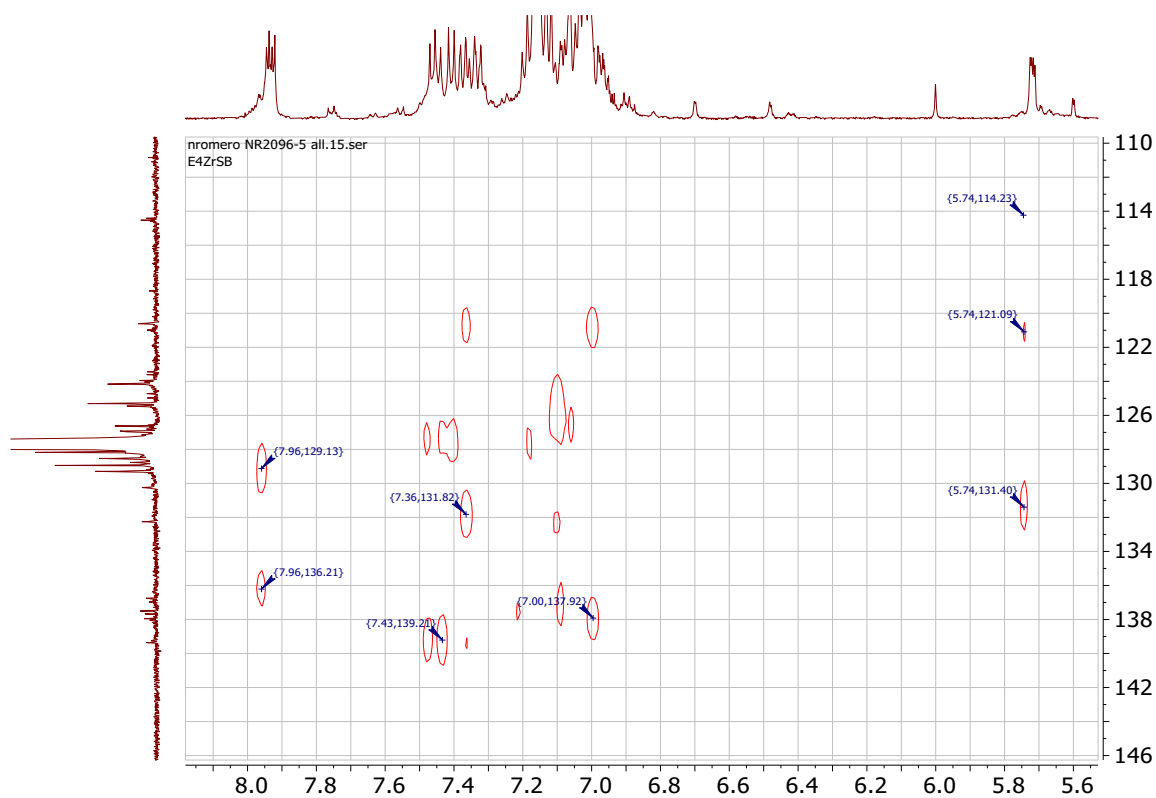

**Figure S22.**  $^1\text{H}$ - $^{13}\text{C}$  HMBC NMR spectrum (400 MHz,  $\text{C}_6\text{D}_6$ , 23 °C) of  $\{p\text{-}(E)\text{-BisInd}\}(\text{ZrCl}_2\text{Cp}^*)_2$ .

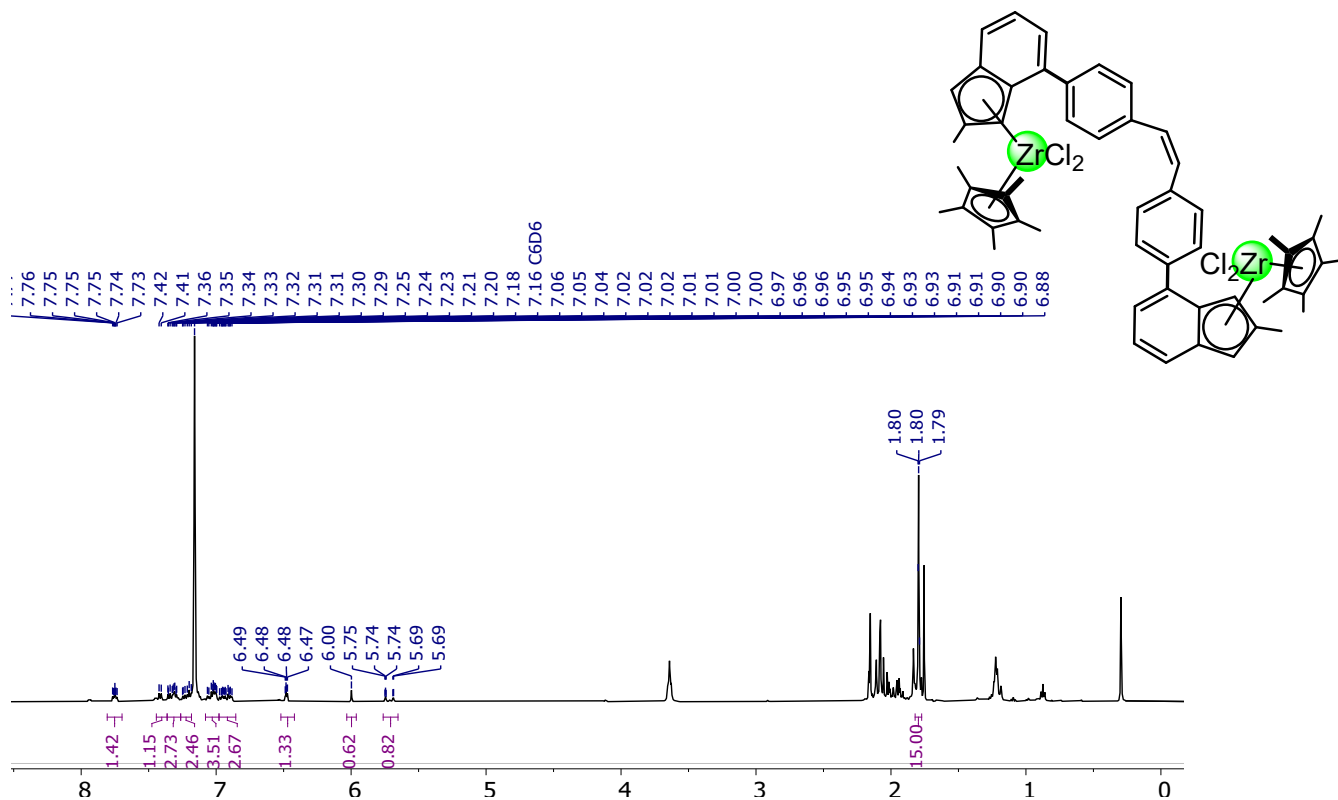

**Figure S23.**  $^1H$  NMR spectrum (400 MHz,  $C_6D_6$ , 23 °C) of  $\{p\text{-(Z)-BisIndSB}\}(ZrCl_2Cp^*)_2$ .

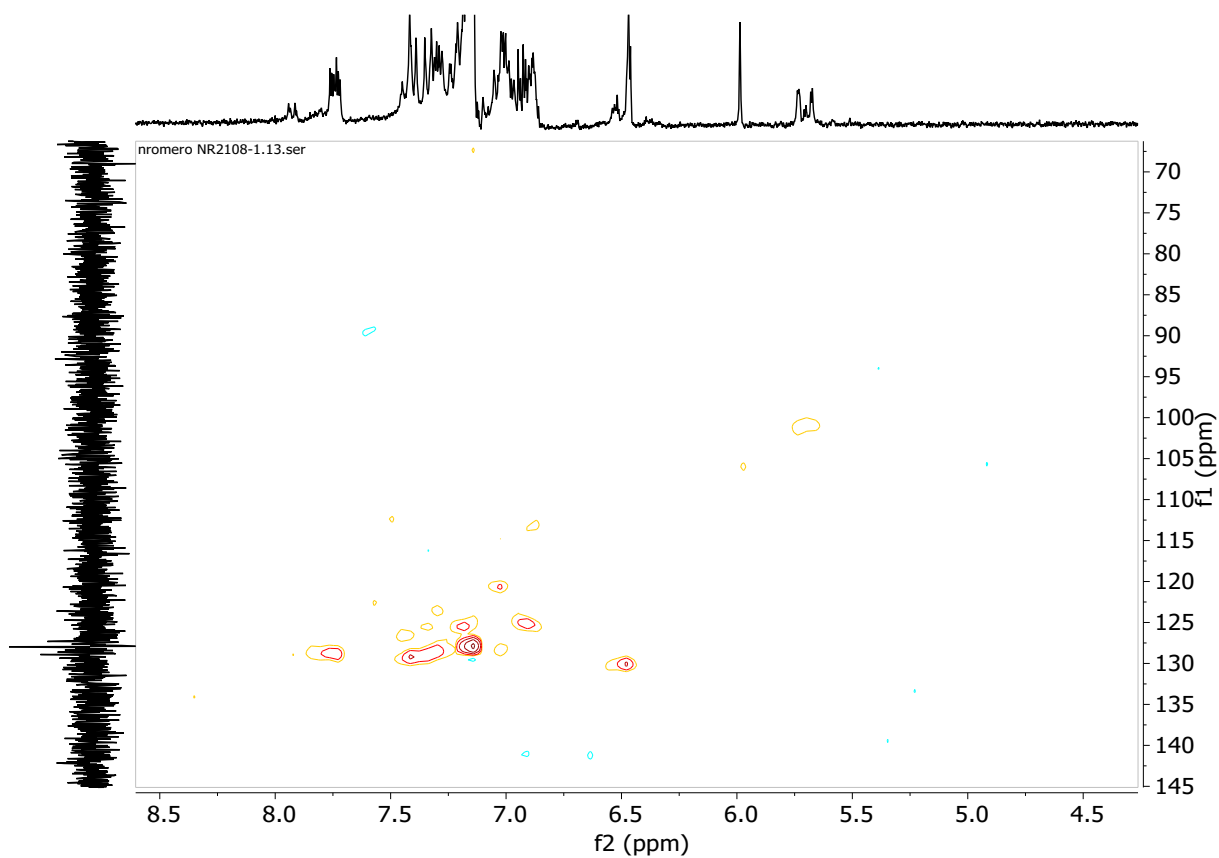

**Figure S24.**  $^1H$ - $^{13}C$  HSQC NMR spectrum (100 MHz,  $C_6D_6$ , 23 °C) of  $\{p\text{-(Z)-BisIndSB}\}(ZrCl_2Cp^*)_2$ .

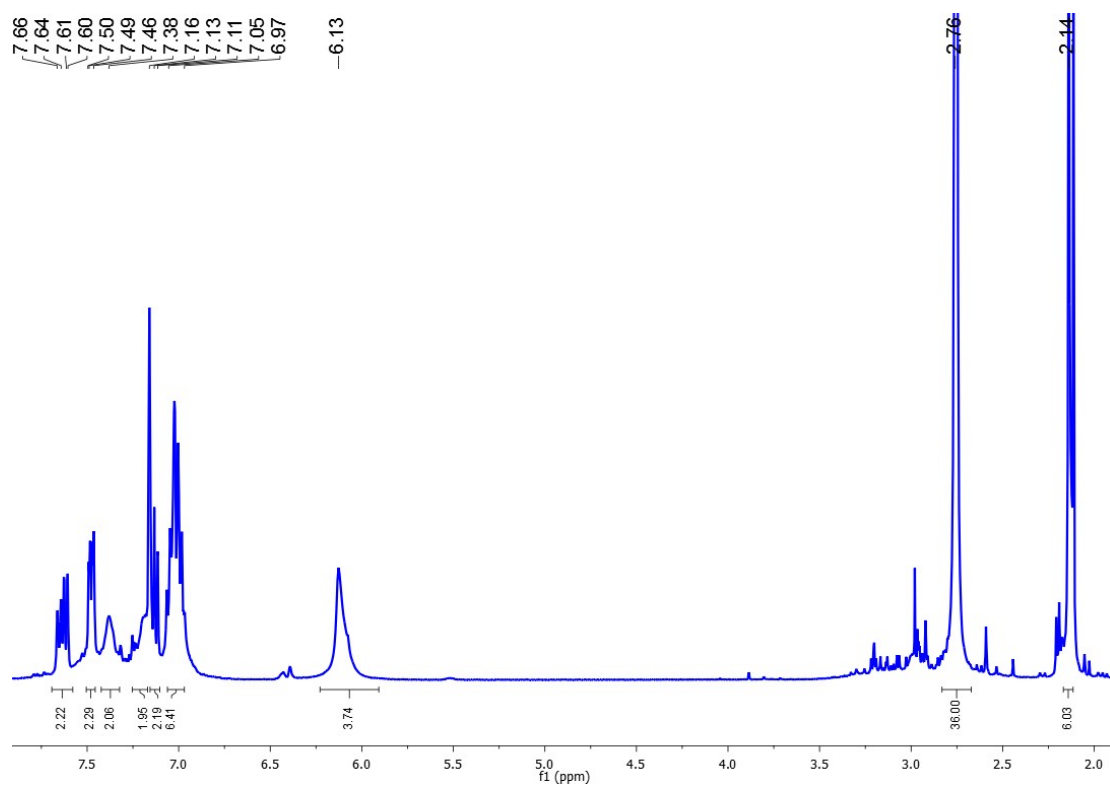

**Figure S25.**  $^1\text{H}$  NMR spectrum (400 MHz,  $\text{C}_6\text{D}_6$ , 25 °C) of *o*-(*E*)-BisIndSB} $\{\text{Zr}(\text{NMe}_2)_3\}_2$ .

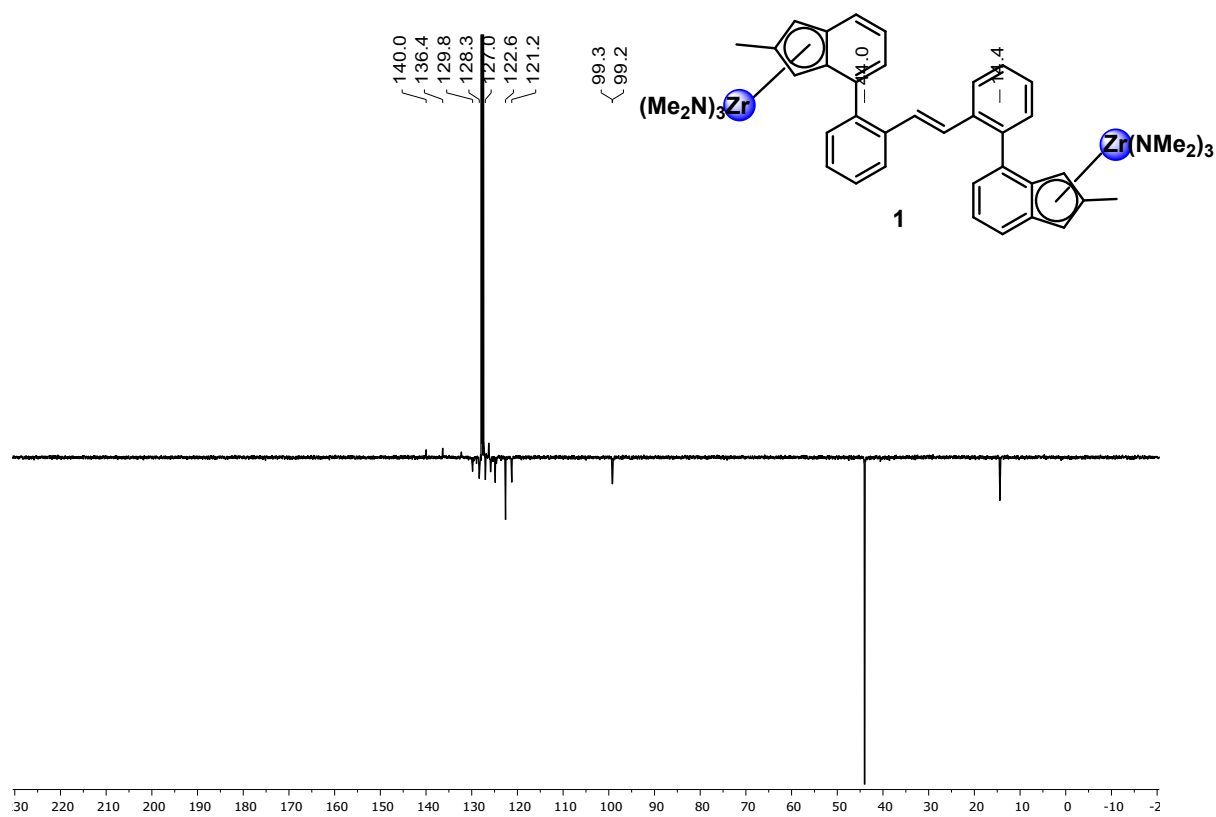

**Figure S26.**  $^{13}\text{C}\{^1\text{H}\}$  JMOD NMR spectrum (101 MHz,  $\text{C}_6\text{D}_6$ , 23 °C) of *o*-(*E*)-BisIndSB} $\{\text{Zr}(\text{NMe}_2)_3\}_2$ .

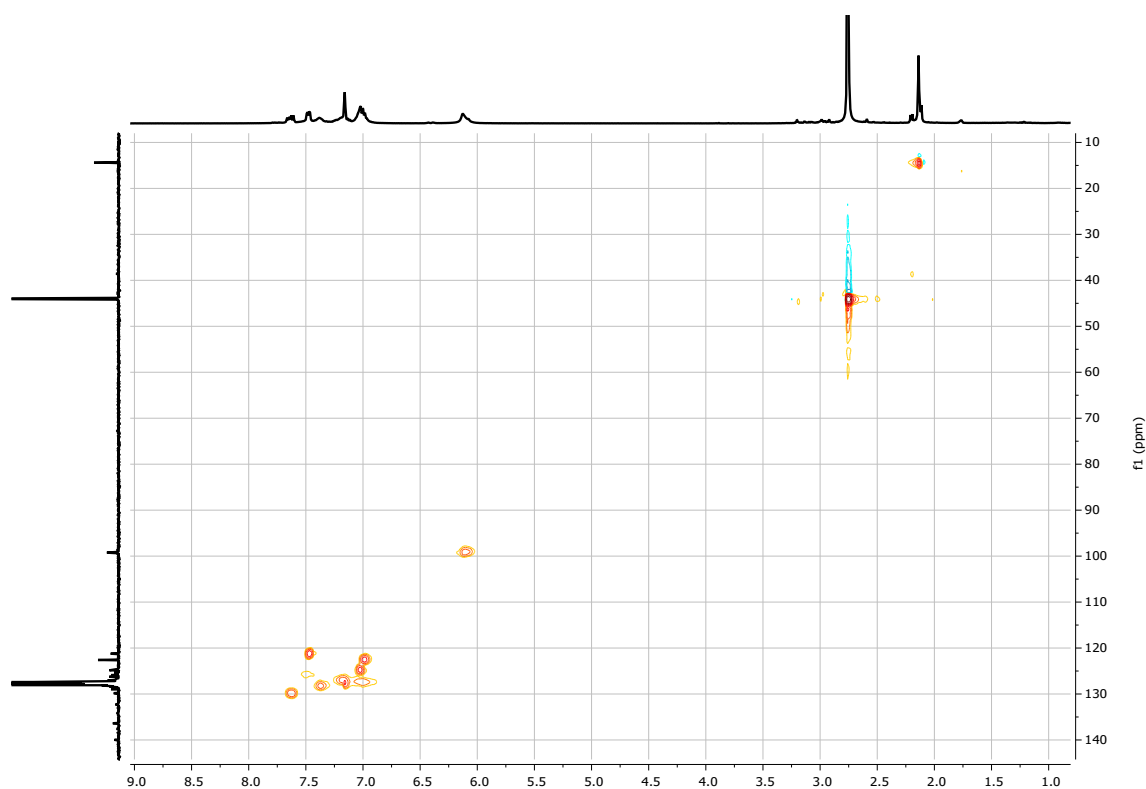

**Figure S27.**  $^1\text{H}$ - $^{13}\text{C}$  HSQC NMR spectrum (100 MHz,  $\text{C}_6\text{D}_6$ , 25  $^\circ\text{C}$ ) of  $\{o\text{-(E)}\text{-BisIndSB}\}(\text{Zr}(\text{NMe}_2)_3)_2$ .

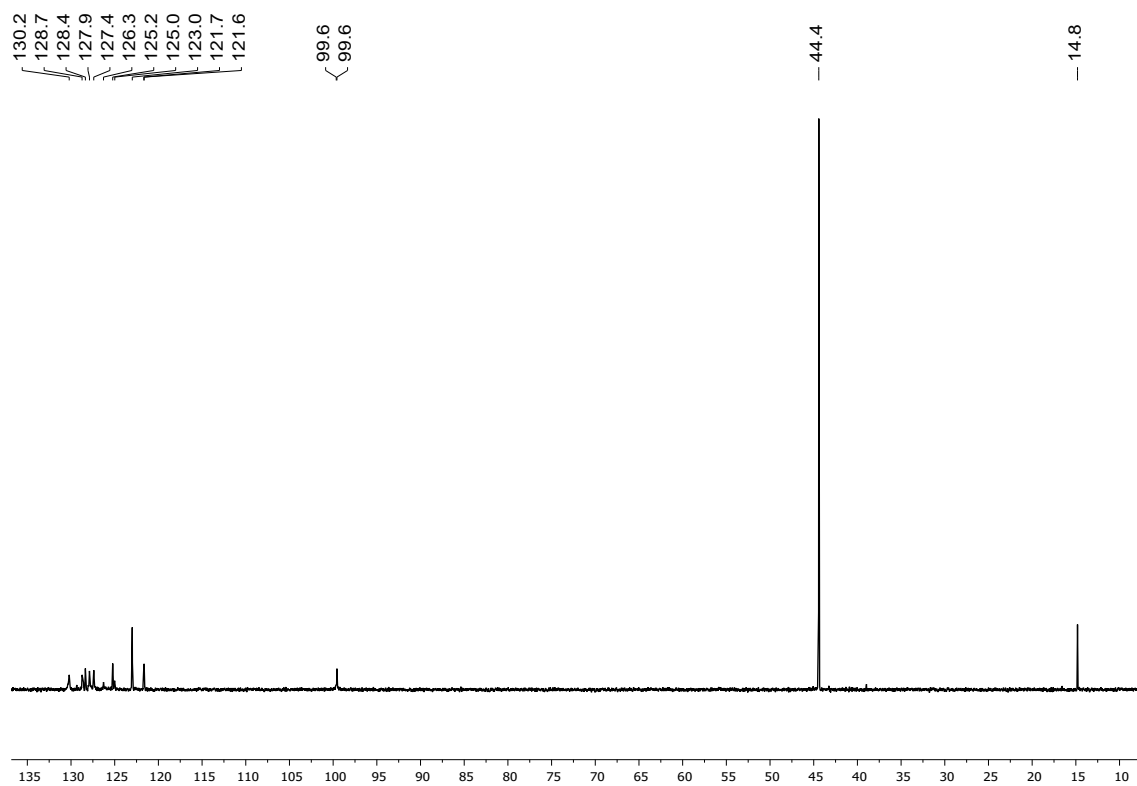

**Figure S28.** DEPT 135  $^{13}\text{C}$  NMR spectrum (101 MHz,  $\text{C}_6\text{D}_6$ , 25  $^\circ\text{C}$ ) of  $\{o\text{-(E)}\text{-BisIndSB}\}(\text{Zr}(\text{NMe}_2)_3)_2$ .

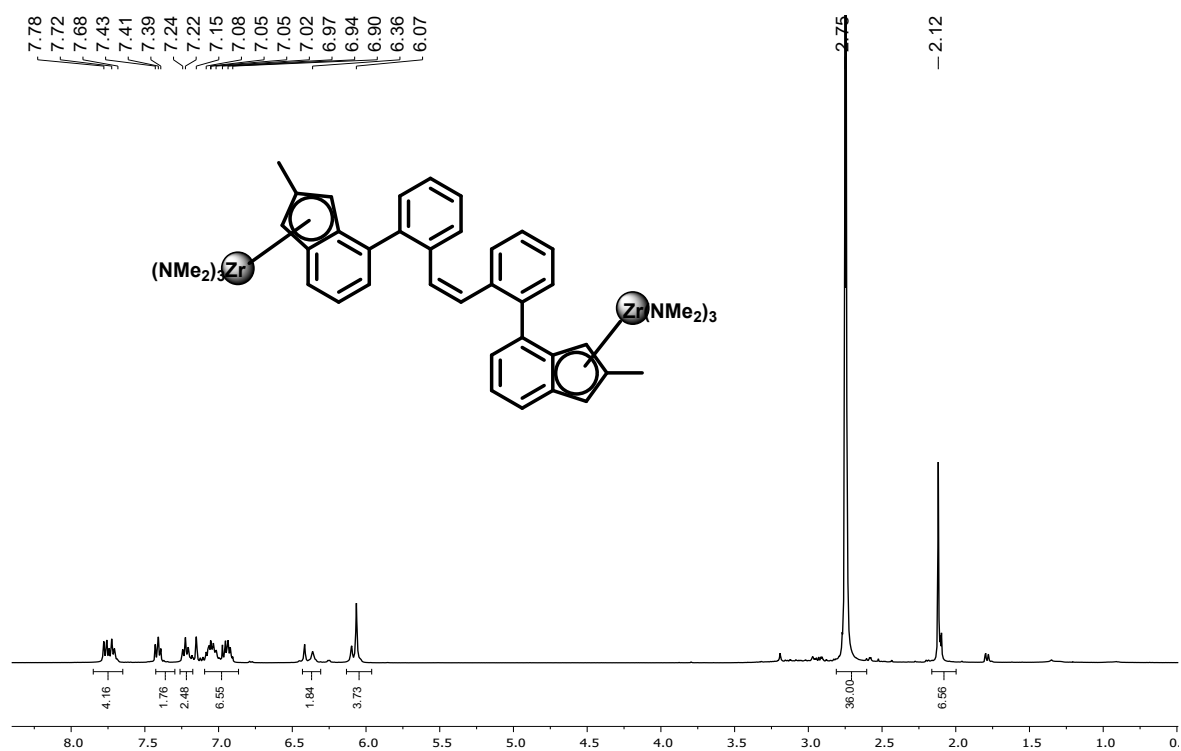

**Figure S29.**  $^1\text{H}$  NMR spectrum (400 MHz,  $\text{C}_6\text{D}_6$ , 23  $^\circ\text{C}$ ) of  $\{o\text{-}(Z)\text{-BisIndSB}\}\{\text{Zr}(\text{NMe}_2)_3\}_2$ .

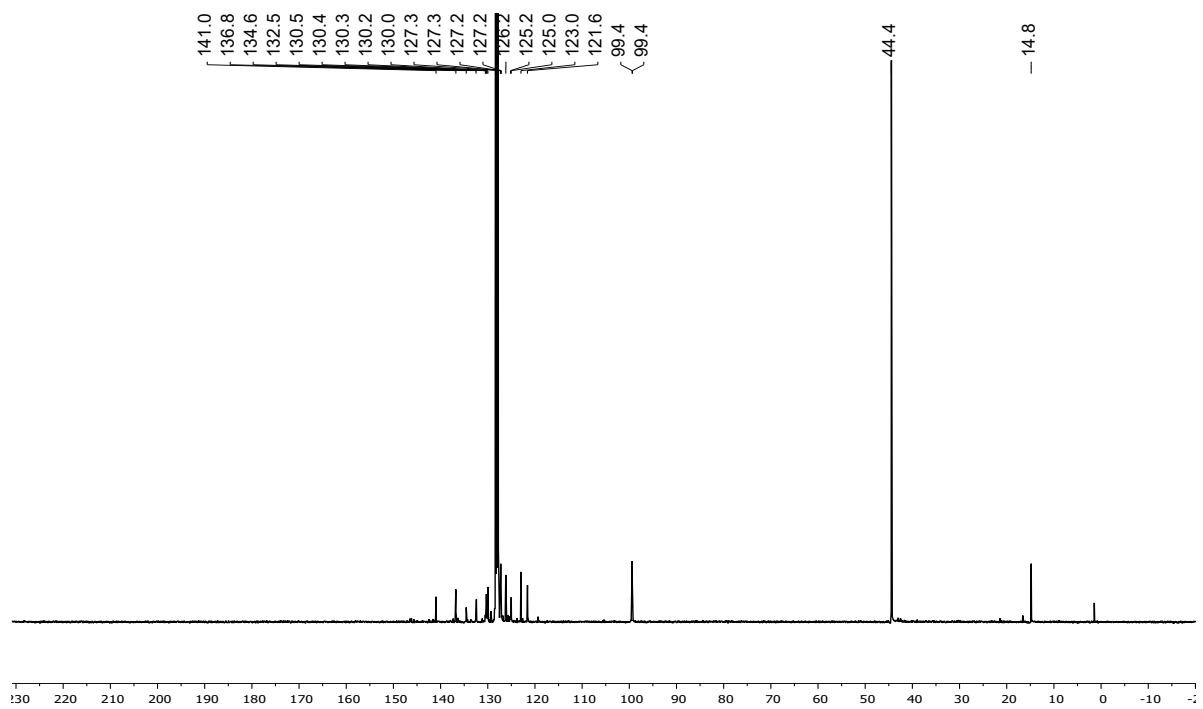

**Figure S30.**  $^{13}\text{C}\{^1\text{H}\}$  NMR spectrum (101 MHz,  $\text{C}_6\text{D}_6$ , 25  $^\circ\text{C}$ ) of  $\{o\text{-}(Z)\text{-BisIndSB}\}\{\text{Zr}(\text{NMe}_2)_3\}_2$ .

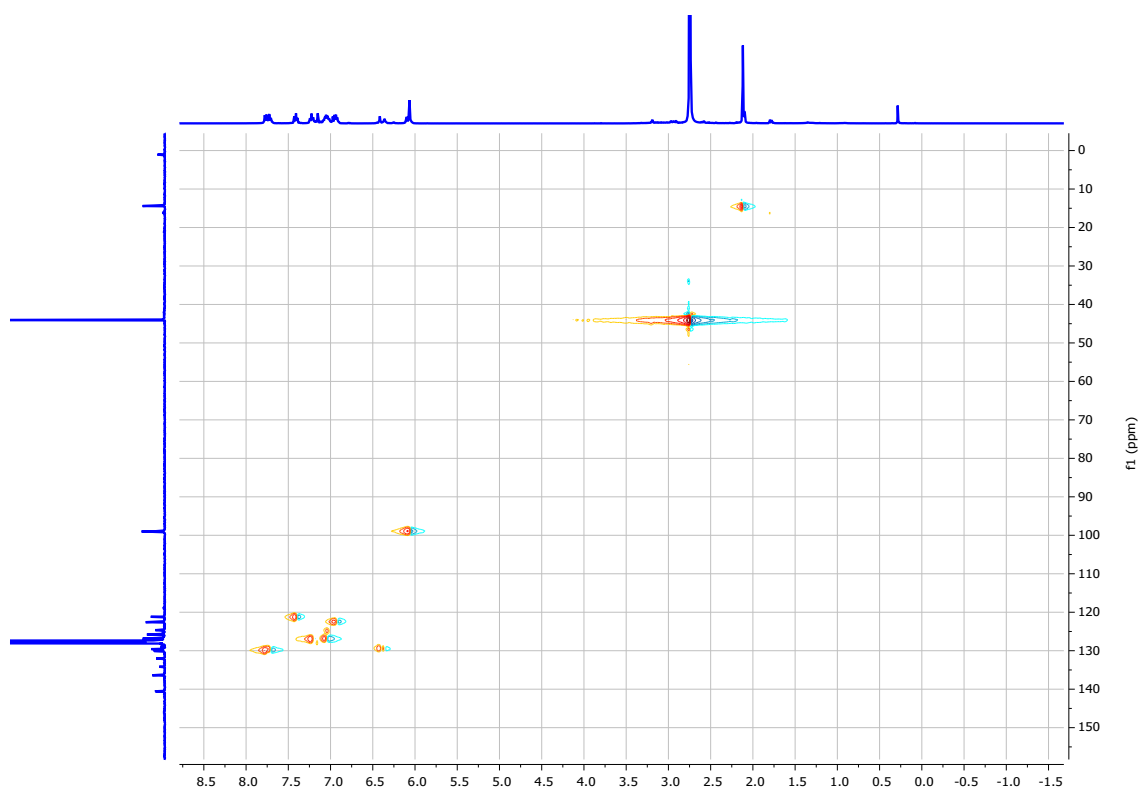

**Figure S31.**  $^1\text{H}$ - $^{13}\text{C}$  HSQC NMR spectrum (100 MHz,  $\text{C}_6\text{D}_6$ , 25 °C) of  $\{o\text{-(Z)}$ -BisIndSB $\}(\text{Zr}(\text{NMe}_2)_3)_2$ .

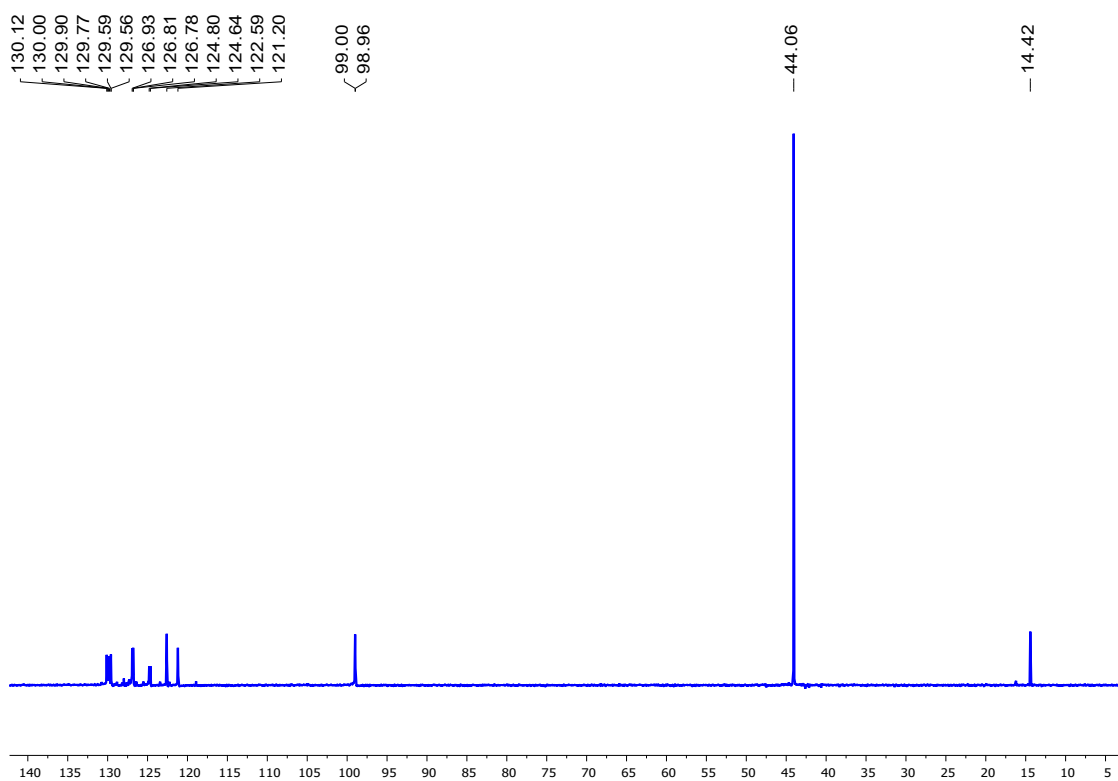

**Figure S32.** DEPT 135  $^{13}\text{C}$  NMR spectrum (101 MHz,  $\text{C}_6\text{D}_6$ , 23 °C) of  $\{o\text{-(Z)}$ -BisIndSB $\}(\text{Zr}(\text{NMe}_2)_3)_2$ .

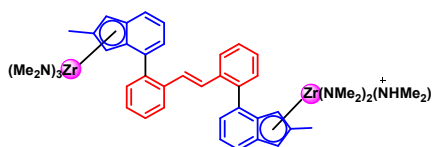

**[(*E*)-Zr(NMe<sub>2</sub>)<sub>5</sub>(NHMe<sub>2</sub>)]<sup>+</sup>**  
 Chemical Formula:  
 [C<sub>46</sub>H<sub>63</sub>N<sub>6</sub>Zr<sub>2</sub>]<sup>+</sup>  
 Exact Mass: 879.320

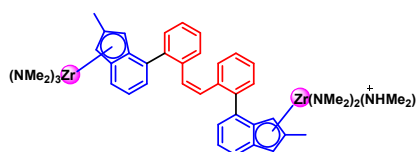

**[(*Z*)-Zr(NMe<sub>2</sub>)<sub>5</sub>(NHMe<sub>2</sub>)]<sup>+</sup>**  
 Chemical Formula:  
 [C<sub>46</sub>H<sub>63</sub>N<sub>6</sub>Zr<sub>2</sub>]<sup>+</sup>  
 Exact Mass: 879.320

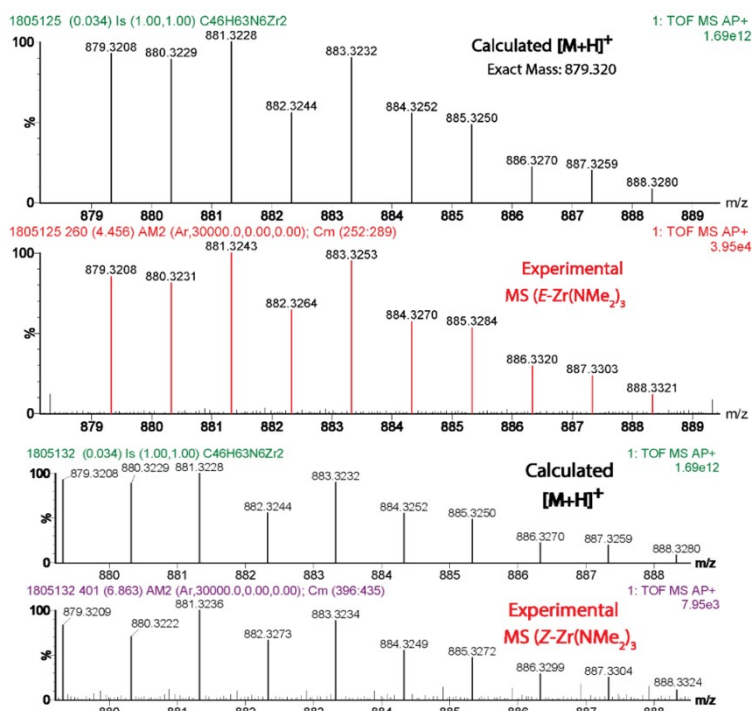

**Figure S33.** Inert Atmospheric Solid Analysis Probe (iASAP) data for complexes {*o*-(*E/Z*)-BisIndSB}(Zr(NMe<sub>2</sub>)<sub>3</sub>)<sub>2</sub>.

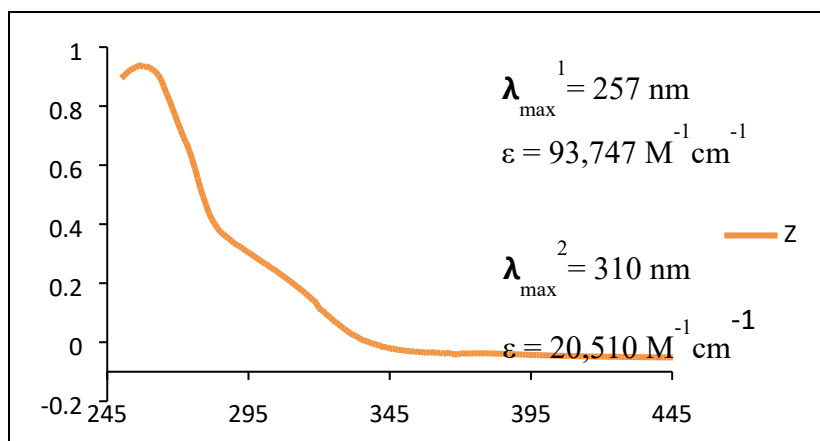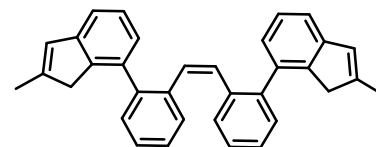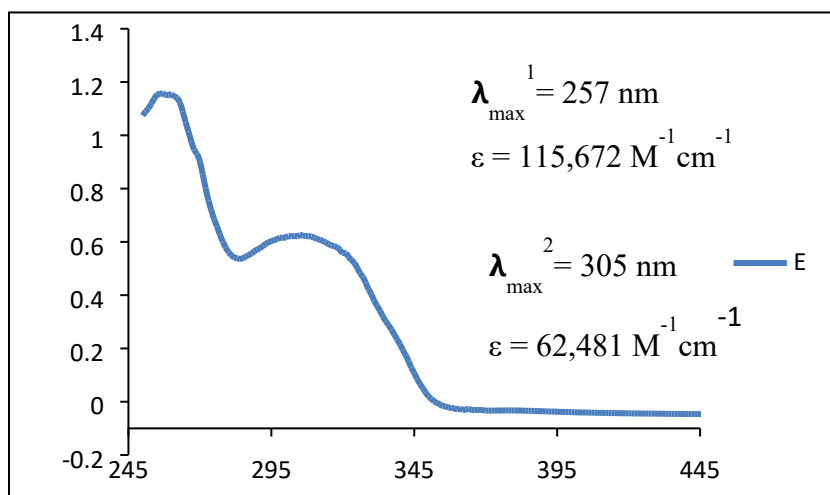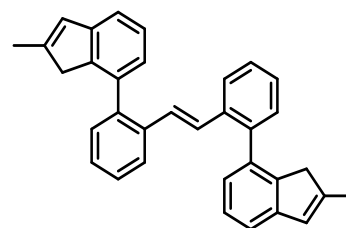

**Figure S34.** Absorption spectra of  $\{o\text{-}(Z)\text{-BisIndSB}\}_2\text{H}_2$  and  $\{o\text{-}(E)\text{-BisIndSB}\}_2\text{H}_2$  proligands in  $\text{CH}_2\text{Cl}_2$  at  $10^{-5} \text{ M}$ .



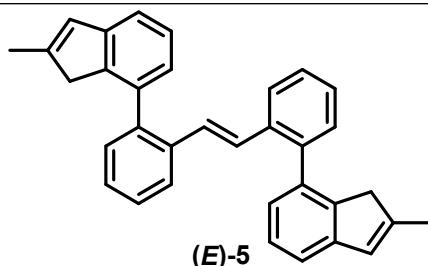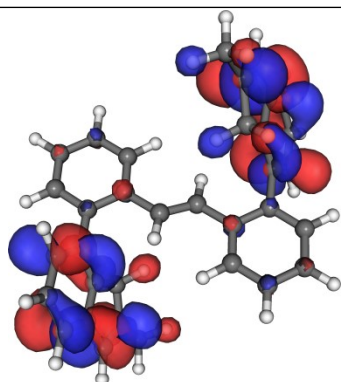

LUMO+1

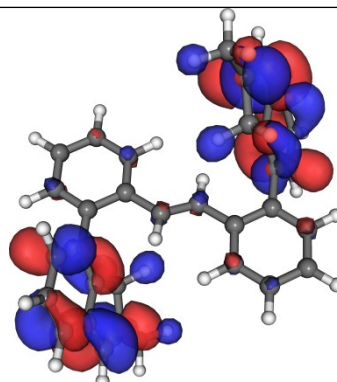

LUMO+2

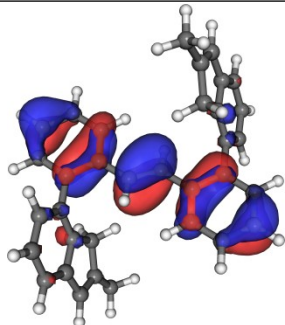

HOMO

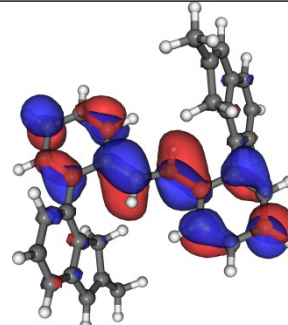

LUMO

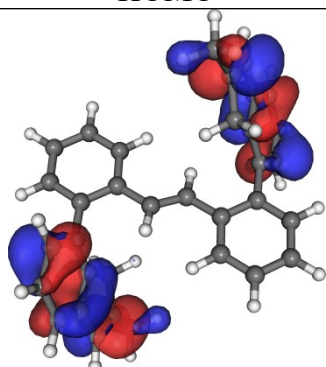

HOMO-2

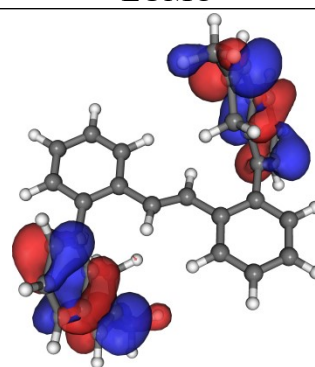

HOMO-1

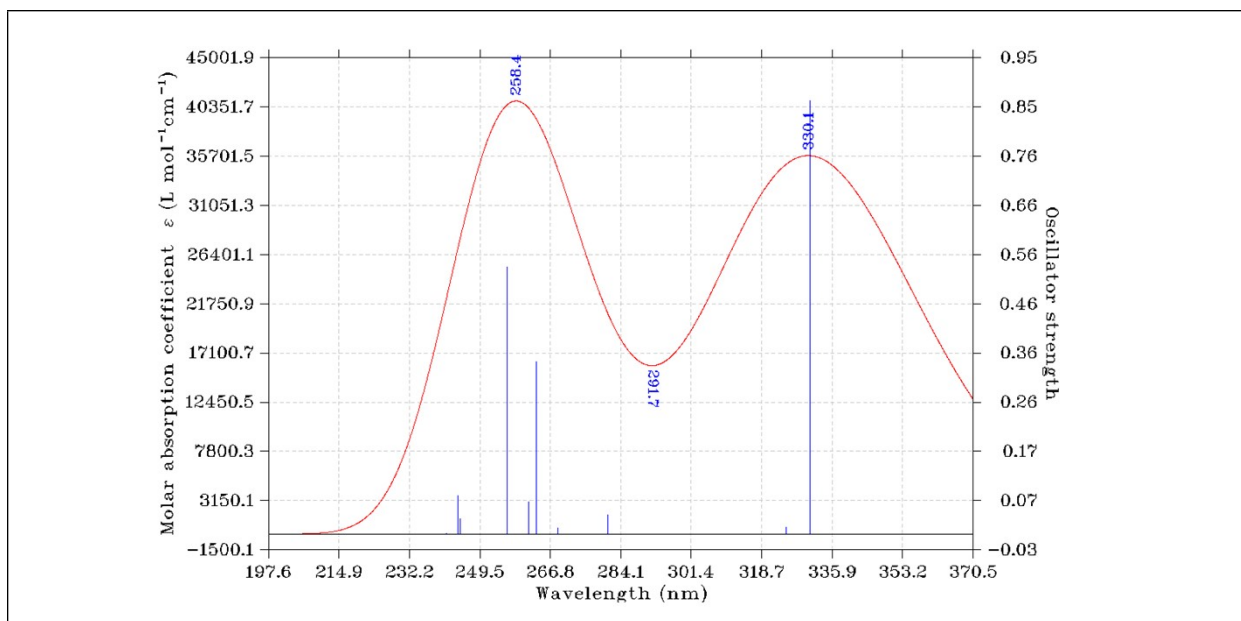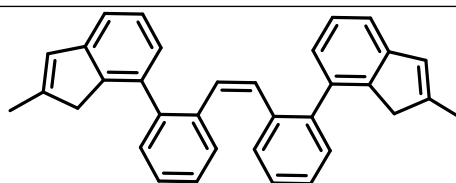

(Z)-5

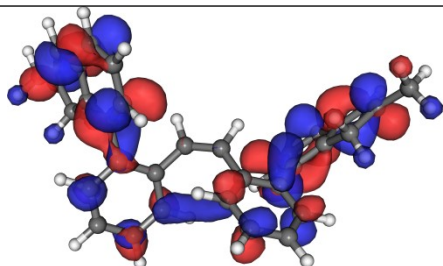

LUMO+1

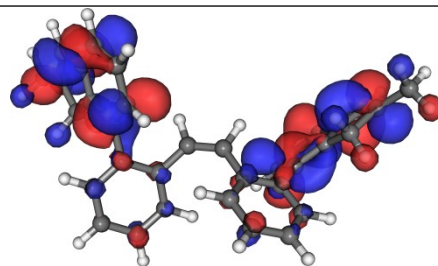

LUMO+2

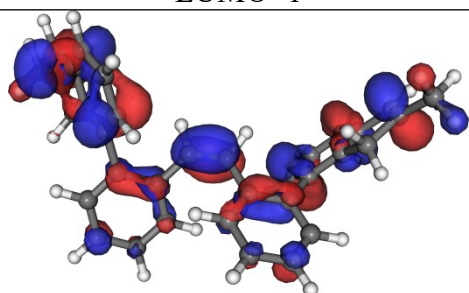

HOMO

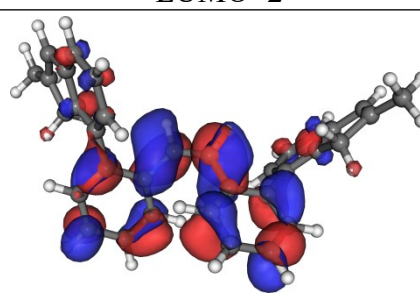

LUMO

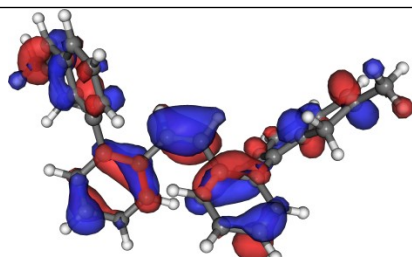

HOMO-2

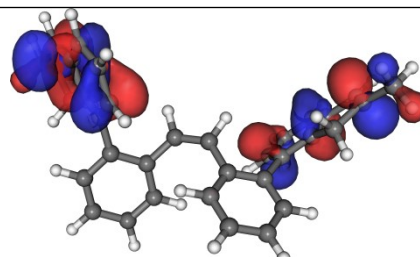

HOMO-1

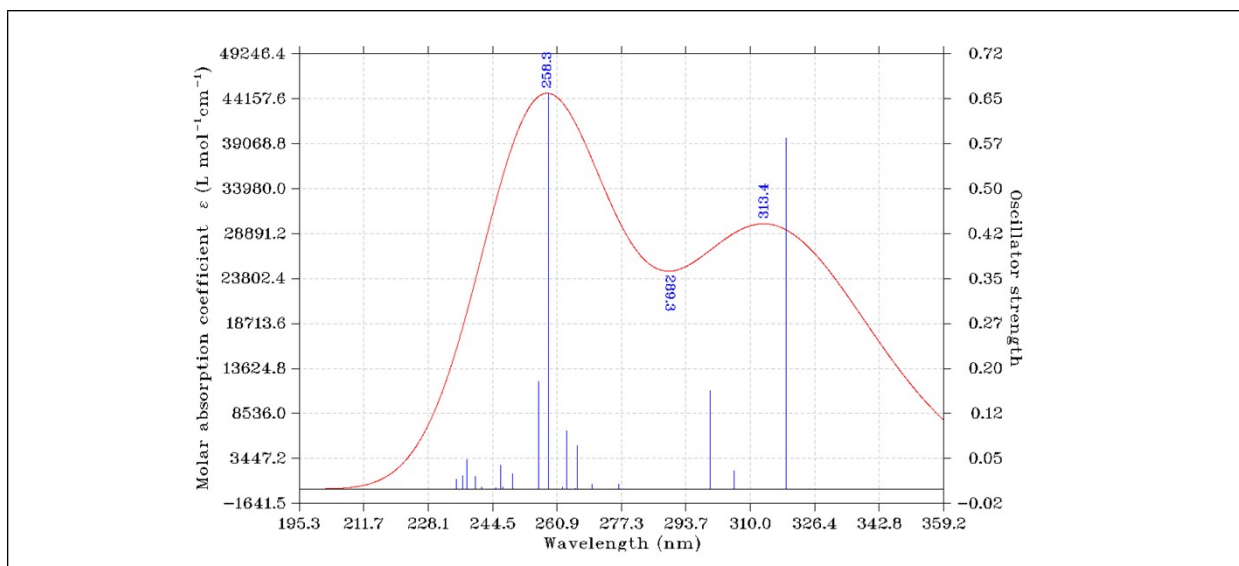

**Figure S35.** Frontier Kohn-Sham orbitals and absorption spectra calculated for {*o*-(*Z/E*)-BisIndSB}<sub>2</sub> proligands.

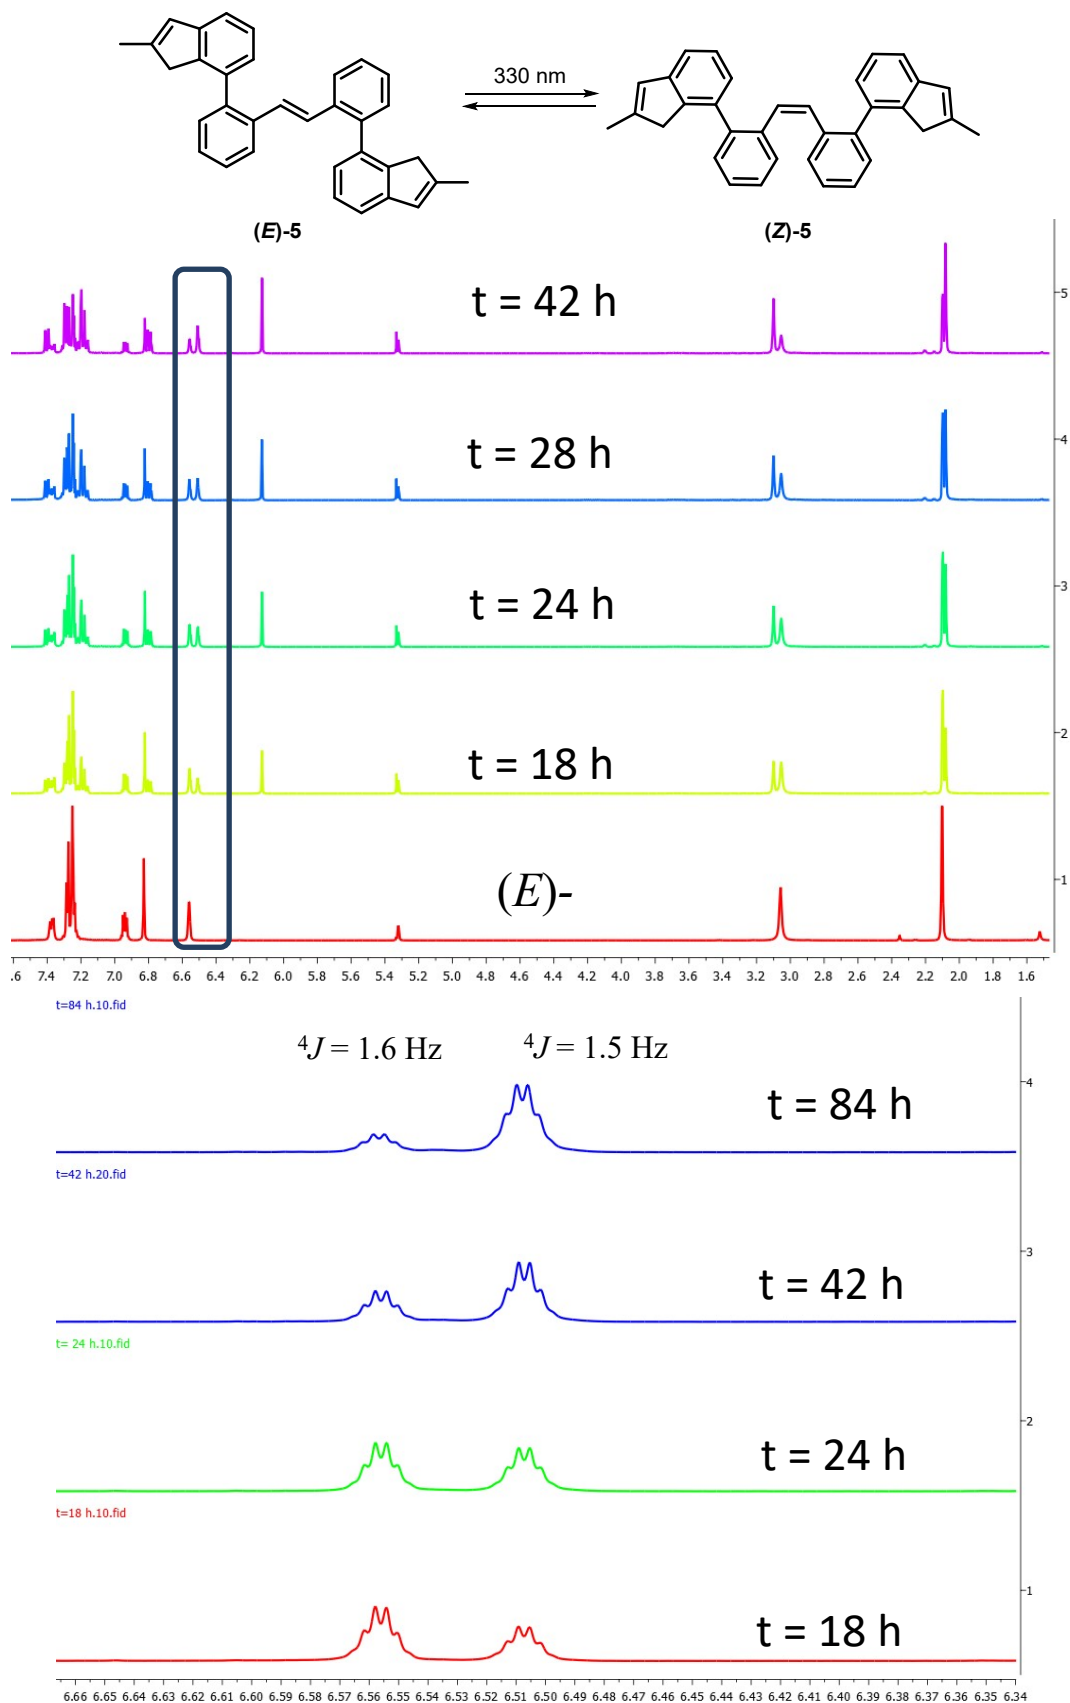

**Figure S36.** Photoisomerization of  $(E)$ - to  $(Z)$ -{BisIndSB} $\}_2$  proligands by UV irradiation at  $\lambda = 330 \text{ nm}$ , monitored by  ${}^1\text{H}$  NMR in  $\text{CD}_2\text{Cl}_2$  at  $10^{-2} \text{ M}$ ,  $23 \text{ }^\circ\text{C}$ .

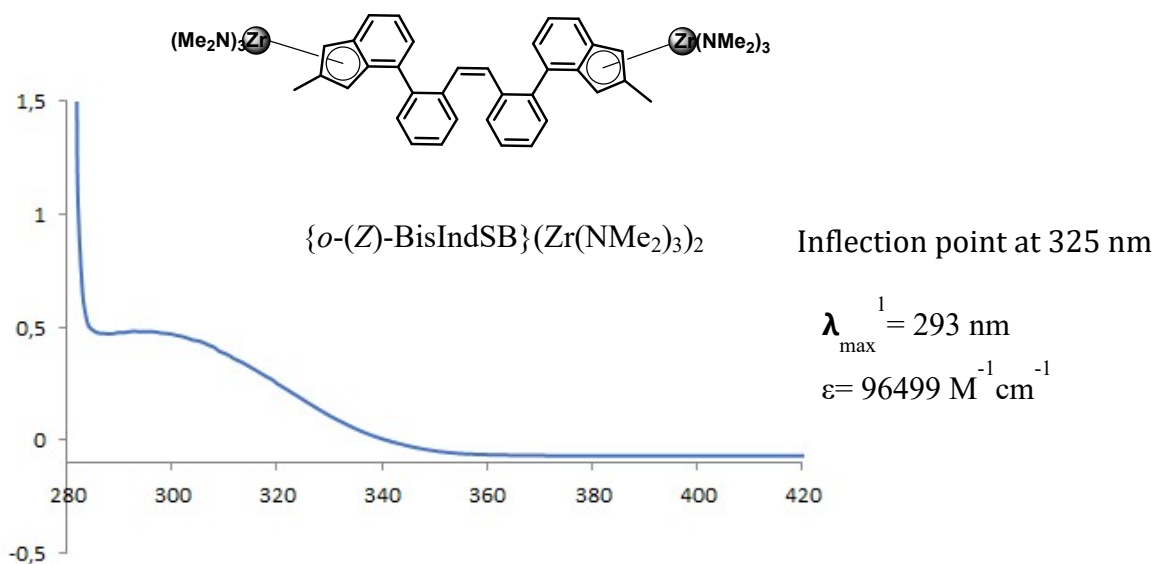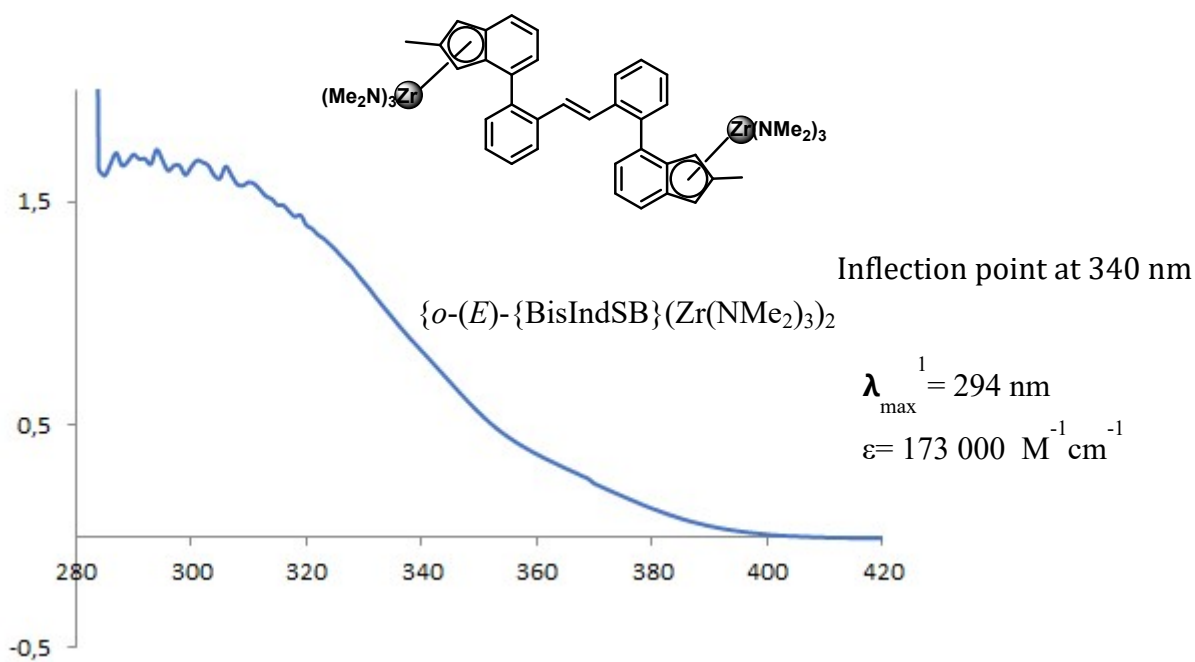

**Figure S37.** Absorption spectra of (Z)- and (E)- $\{o\text{-BisIndSB}\}(\text{Zr}(\text{NMe}_2)_3)_2$  complexes in toluene at  $10^{-5}$  M.

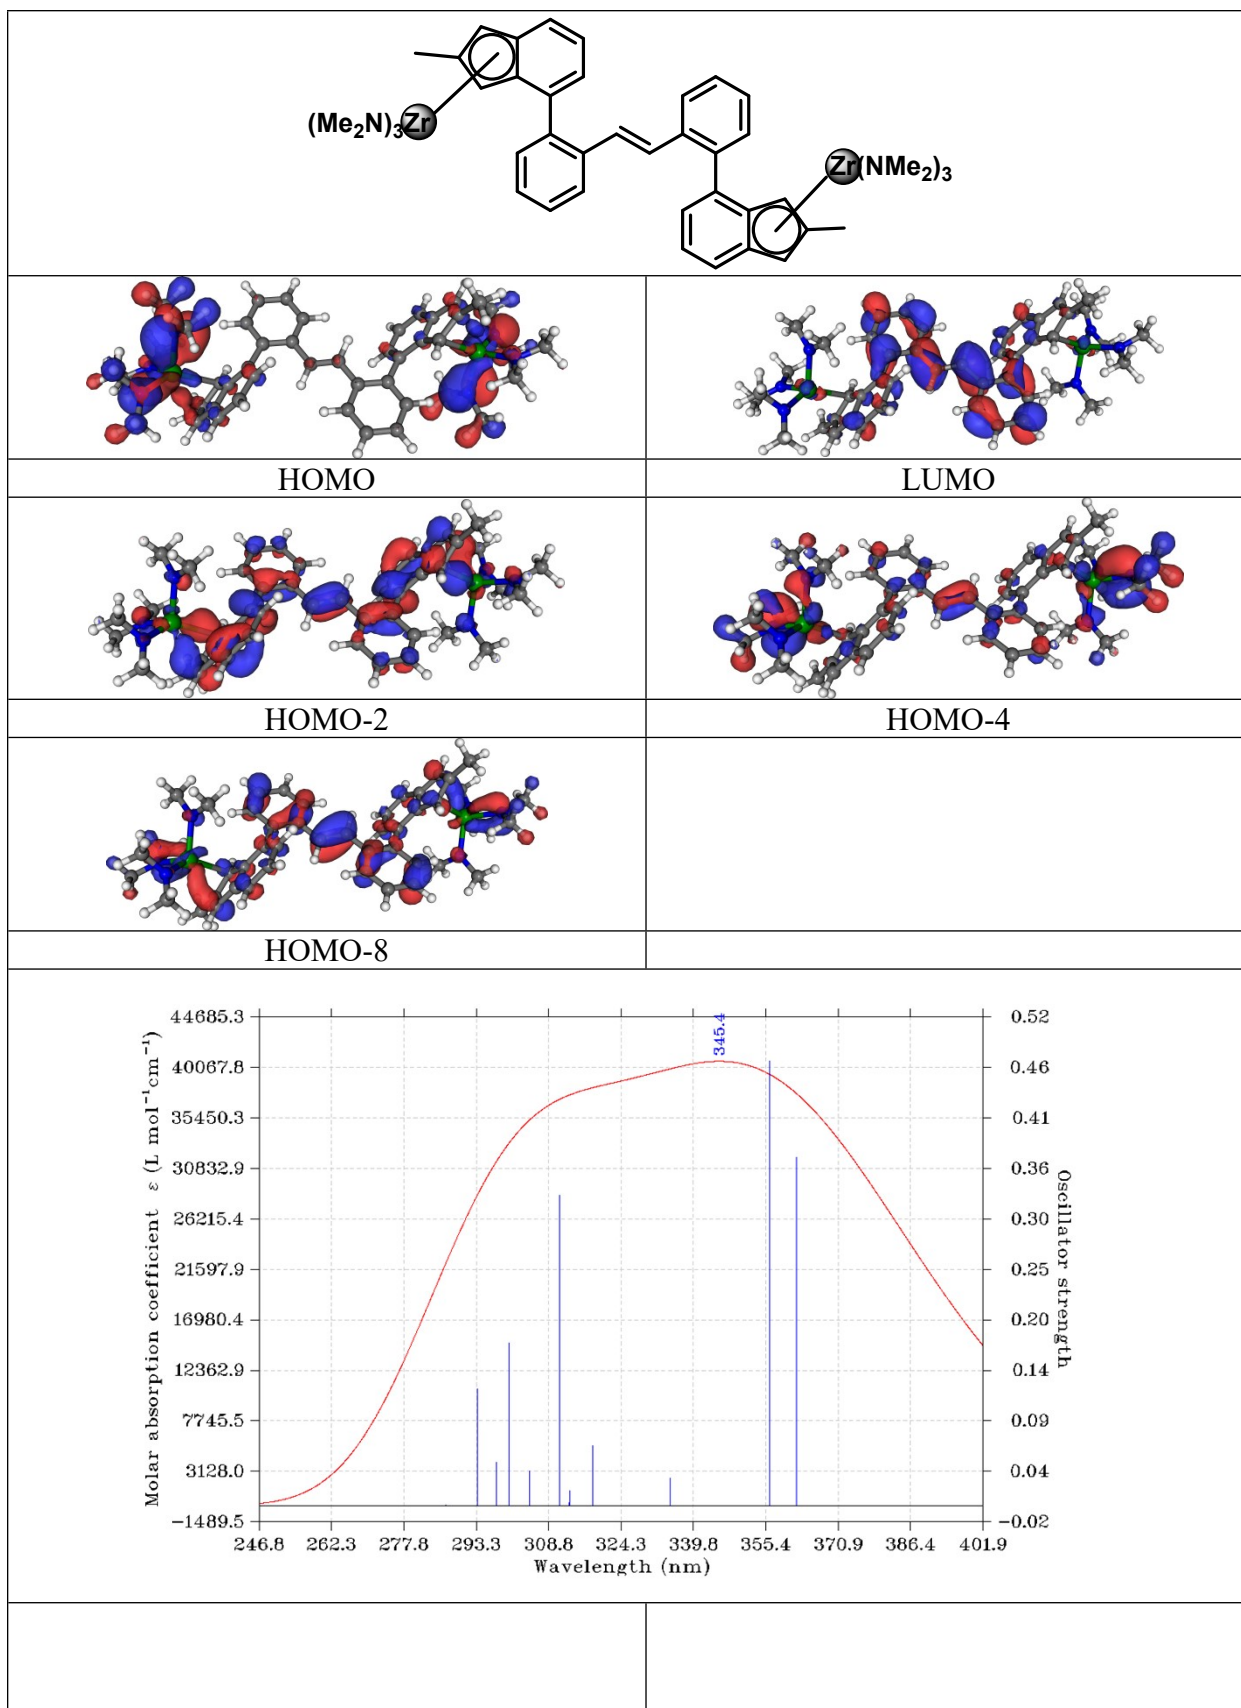

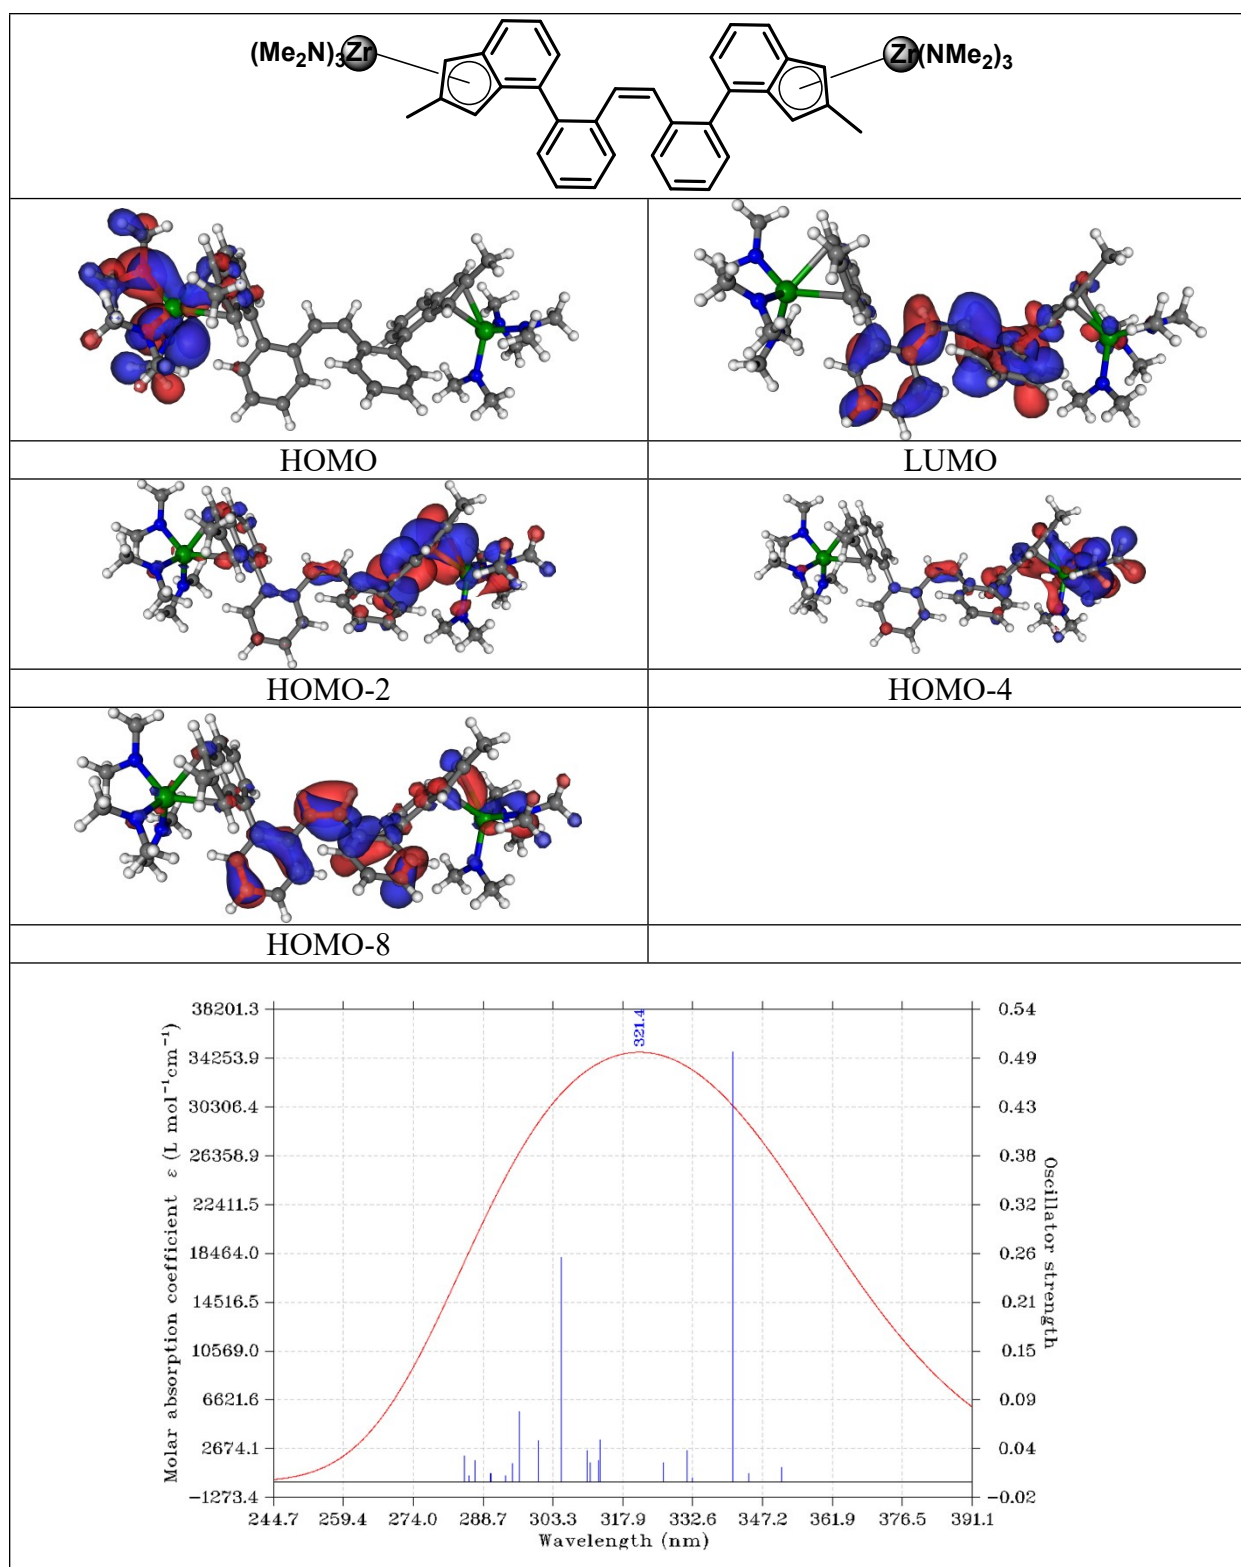

**Figure S38.** Relevant Kohn-Sham orbitals and absorption spectra calculated for  $\{o\text{-(E/Z)-BisIndSB}\}\text{Zr(NMe}_2\text{)}_3\text{)}_2$  complexes.

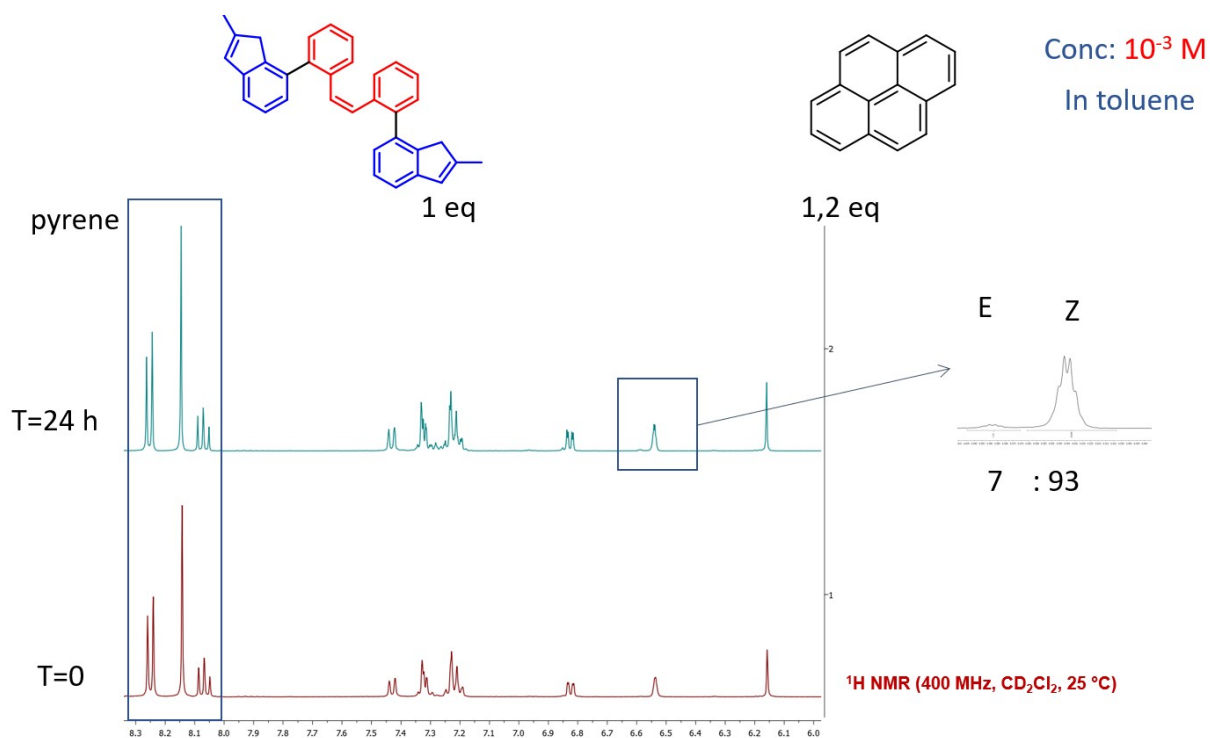

**Figure S39.** Photosensitized stilbene isomerization (330 nm) of  $\{o\text{-}(Z)\text{-BisIndSB}\}_2\text{H}_2$  proligand by pyrene monitored by  $^1\text{H NMR}$  (400 MHz,  $\text{CD}_2\text{Cl}_2$ , 23 °C).

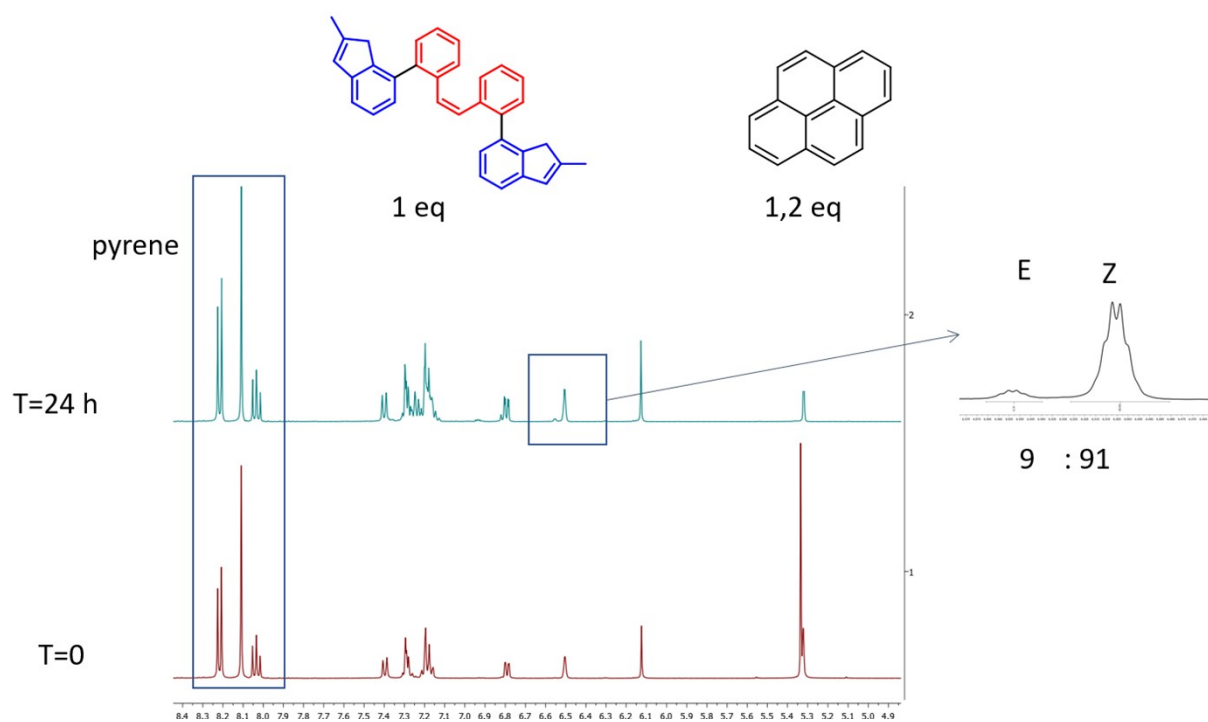

**Figure S40.** Photosensitized stilbene isomerization (350 nm) of  $\{o\text{-}(Z)\text{-BisIndSB}\}_2\text{H}_2$  proligand by pyrene monitored by  $^1\text{H NMR}$  (400 MHz,  $\text{CD}_2\text{Cl}_2$ , 23 °C).



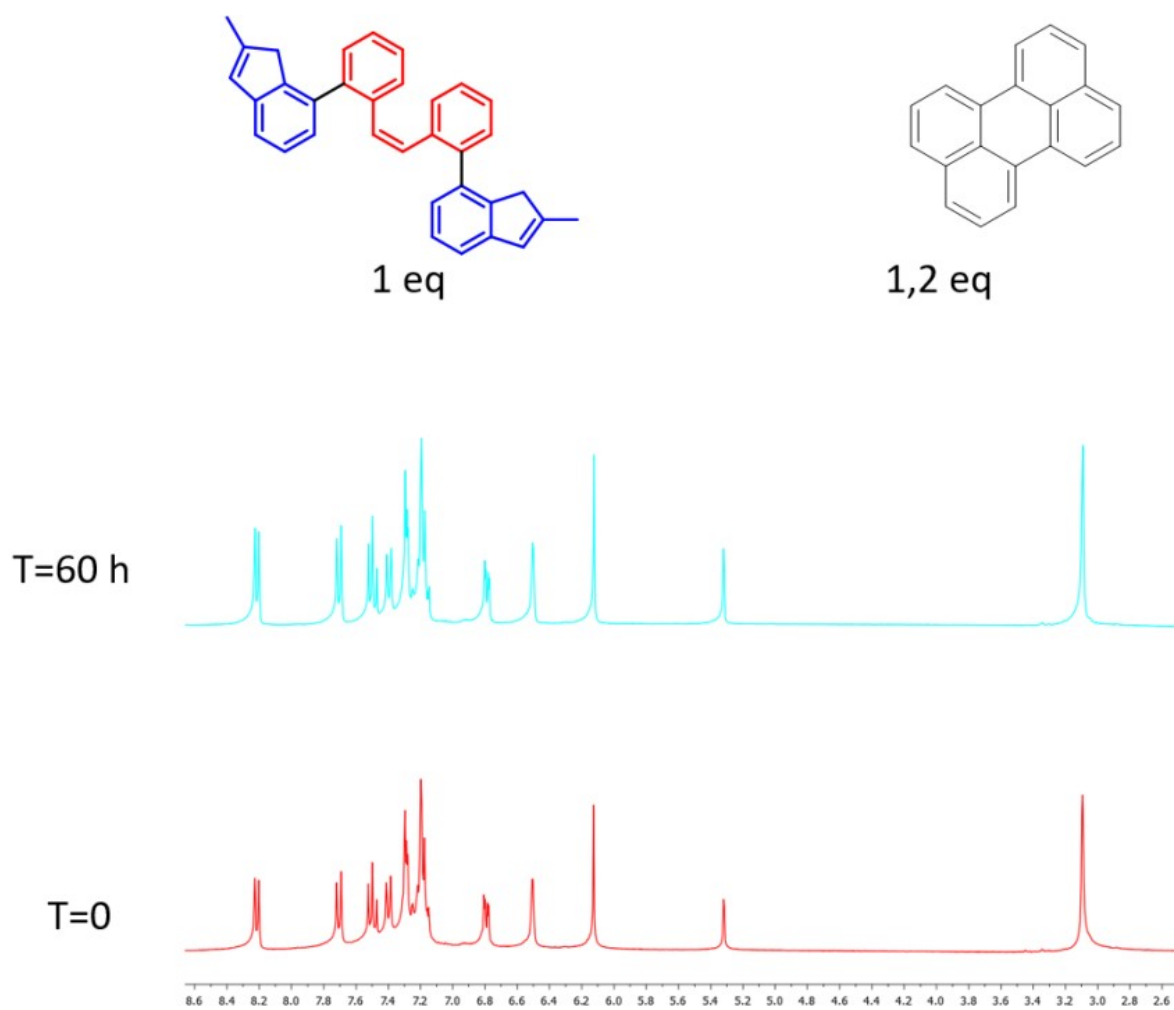

**Figure S41.** Attempted photosensitized stilbene isomerization (450 nm) of *o*-(*Z*)-BisIndSB}H<sub>2</sub> proligand by perylene monitored by  $^1\text{H}$  NMR (400 MHz, CD<sub>2</sub>Cl<sub>2</sub>, 25 °C).

**Table S1.** Summary of Crystal and Refinement Data for Compounds.

|                                          | <i>o</i> -( <i>E</i> )-SBBr <sub>2</sub> | <i>o</i> -( <i>Z</i> )-SBBr <sub>2</sub> | <i>m</i> -( <i>E</i> )-SBBr <sub>2</sub> | <i>o</i> -( <i>E</i> )-(BisIndSB)H <sub>2</sub> | <i>o</i> -( <i>Z</i> )-(BisIndSB)H <sub>2</sub> |
|------------------------------------------|------------------------------------------|------------------------------------------|------------------------------------------|-------------------------------------------------|-------------------------------------------------|
| CCDC number                              | 2322681                                  | 2322682                                  | 2322680                                  | 1894661                                         | 1894662                                         |
| Empirical formula                        | C14H10Br2                                | C14H10Br2                                | C14H10Br2                                | C34H28                                          | C34H28                                          |
| Formula weight                           | 338.04                                   | 338.04                                   | 338.04                                   | 436.56                                          | 436.56                                          |
| Temperature, K                           | 295(2)                                   | 150(2)                                   | 150(2)                                   | 150(2)                                          | 150(2)                                          |
| Wavelength, Å                            | 0.71073                                  | 0.71073                                  | 0.71073                                  | 0.71073                                         | 0.71073                                         |
| Crystal system                           | orthorhombic                             | Monoclinic                               | Monoclinic                               | Monoclinic                                      | Triclinic                                       |
| Space group                              | P 2n 2ab                                 | P 21/c                                   | P 21/c                                   | P 21/c                                          | P -1                                            |
| a, Å                                     | 13.8322(7)                               | 15.6067(17)                              | 9.7654(17)                               | 12.0376(7)                                      | 9.4590(8)                                       |
| b, Å                                     | 11.7938(6)                               | 14.7909(18)                              | 3.9608(7)                                | 7.4582(4)                                       | 9.7392(7)                                       |
| c, Å                                     | 15.1516(7)                               | 11.1941(15)                              | 15.486(2)                                | 14.0803(6)                                      | 13.9219(11)                                     |
| α                                        | 90                                       | 90                                       | 90                                       | 90                                              | 107.331(2)                                      |
| β                                        | 90                                       | 108.258(5)                               | 93.132(6)                                | 90.605(2)                                       | 100.800(3)                                      |
| γ                                        | 90                                       | 90                                       | 90                                       | 90                                              | 91.401(2)                                       |
| Volume, Å <sup>3</sup>                   | 2471.7(2)                                | 2453.9(5)                                | 598.09(17)                               | 1264.04(11)                                     | 1198.20(16)                                     |
| Z                                        | 8                                        | 8                                        | 2                                        | 2                                               | 2                                               |
| Density (calc.), Mg/m <sup>3</sup>       | 1.817                                    | 1.830                                    | 1.877                                    | 1.147                                           | 1.210                                           |
| Absorption coefficient, mm <sup>-1</sup> | 6.527                                    | 6.575                                    | 6.744                                    | 0.065                                           | 0.068                                           |
| Crystal size, mm <sup>3</sup>            | 0.36 × 0.22 × 0.15                       | 0.560 × 0.470 × 0.310                    | 0.600 × 0.500 × 0.200                    | 0.310 × 0.190 × 0.150                           | 0.290 × 0.260 × 0.120                           |
| Reflections collected                    | 11215                                    | 23636                                    | 5387                                     | 10764                                           | 27906                                           |
| Independent reflections                  | 2831 [R(int) = 0.0415]                   | 5628 [R(int) = 0.0578]                   | 1357 [R(int) = 0.0554]                   | 2885 [R(int) = 0.0505]                          | 5479 [R(int) = 0.0720]                          |
| Max. and min. transmission               | 0.376 and 0.245                          | 0.130 and 0.060                          | 0.260 and 0.076                          | 0.990 and 0.839                                 | 0.992 and 0.873                                 |
| Data / restraints / parameters           | 2831 / 0 / 145                           | 5608 / 0 / 289                           | 1357 / 0 / 74                            | 2885 / 0 / 155                                  | 5479 / 0 / 309                                  |
| Final R indices [I > 2σ(I)]              | R1 = 0.0455<br>wR2 = 0.0882              | R1 = 0.0343<br>wR2 = 0.0744              | R1 = 0.0519<br>wR2 = 0.1403              | R1 = 0.0490<br>wR2 = 0.1291                     | R1 = 0.0474<br>wR2 = 0.1159                     |
| R indices (all data)                     | R1 = 0.1003<br>wR2 = 0.1036              | R1 = 0.0504<br>wR2 = 0.0809              | R1 = 0.0572<br>wR2 = 0.1454              | R1 = 0.0595<br>wR2 = 0.1357                     | R1 = 0.0627<br>wR2 = 0.1269                     |
| Goodness-of-fit on F <sup>2</sup>        | 1.027                                    | 1.018                                    | 1.076                                    | 1.062                                           | 1.035                                           |
| Largest diff. peak, e.Å <sup>-3</sup>    | 0.460 and -0.756                         | 1.064 and -1.117                         | 1.537 and -1.616                         | 0.202 and -0.178                                | 0.258 and -0.238                                |

**Table S1 (continued)**

|                                          | <i>o</i> -(Z)-(BisIndSB) <sub>2</sub> (ZrCl <sub>2</sub> Cp <sup>*</sup> ) <sub>2</sub> | <i>m</i> -(E)-(BisIndSB) <sub>2</sub> (ZrCl <sub>2</sub> Cp <sup>*</sup> ) <sub>2</sub> | <i>o</i> -(E)-(BisIndSB)(Zr(NMe <sub>2</sub> ) <sub>3</sub> ) <sub>2</sub> |
|------------------------------------------|-----------------------------------------------------------------------------------------|-----------------------------------------------------------------------------------------|----------------------------------------------------------------------------|
| CCDC number                              | 2322683                                                                                 | 2322679                                                                                 | 1894663                                                                    |
| Empirical formula                        | C54 H56 Cl4 Zr2                                                                         | C54 H56 Cl4 Zr2, 3 (C7 H8)                                                              | C46 H62 N6 Zr2                                                             |
| Formula weight                           | 1029.22                                                                                 | 1305.63                                                                                 | 881.45                                                                     |
| Temperature, K                           | 150(2)                                                                                  | 150(2)                                                                                  | 150(2)                                                                     |
| Wavelength, Å                            | 0.71073                                                                                 | 0.71073                                                                                 | 0.71073                                                                    |
| Crystal system                           | Monoclinic                                                                              | Triclinic                                                                               | Triclinic                                                                  |
| Space group                              | P 21/n                                                                                  | P -1                                                                                    | P -1                                                                       |
| a, Å                                     | 9.0237(12)                                                                              | 15.2349(11)                                                                             | 8.0140(7)                                                                  |
| b, Å                                     | 13.1611(14)                                                                             | 16.0237(11)                                                                             | 9.0810(9)                                                                  |
| c, Å                                     | 39.397(4)                                                                               | 16.3054(12)                                                                             | 17.2090(16)                                                                |
| α                                        | 90                                                                                      | 118.098(2)                                                                              | 80.724(3)                                                                  |
| β                                        | 92.514(3)                                                                               | 103.060(3)                                                                              | 78.474(3)                                                                  |
| γ                                        | 90                                                                                      | 90.216(2)                                                                               | 64.123(3)                                                                  |
| Volume, Å <sup>3</sup>                   | 4674.4(9)                                                                               | 3392.3(4)                                                                               | 1100.20(18)                                                                |
| Z                                        | 4                                                                                       | 2                                                                                       | 1                                                                          |
| Density (calc.), Mg/m <sup>3</sup>       | 1.463                                                                                   | 1.278                                                                                   | 1.330                                                                      |
| Absorption coefficient, mm <sup>-1</sup> | 0.711                                                                                   | 0.505                                                                                   | 0.511                                                                      |
| Crystal size, mm <sup>3</sup>            | 0.200 × 0.180 × 0.080                                                                   | 0.330 × 0.240 × 0.110                                                                   | 0.600 × 0.350 × 0.27                                                       |
| Reflections collected                    | 25061                                                                                   | 73188                                                                                   | 26221                                                                      |
| Independent reflections                  | 10383 [R(int) = 0.0525]                                                                 | 15544 [R(int) = 0.0450]                                                                 | 5042 [R(int) = 0.0271]                                                     |
| Max. and min. transmission               | 0.945 and 0.788                                                                         | 0.916 and 0.862                                                                         | 0.871 and 0.801                                                            |
| Data / restraints / parameters           | 10383 / 0 / 392                                                                         | 15544 / 0 / 601                                                                         | 5042 / 0 / 251                                                             |
| Final R indices [I > 2σ(I)]              | R1 = 0.1115<br>wR2 = 0.2931                                                             | R1 = 0.0536<br>wR2 = 0.1394                                                             | R1 = 0.0220<br>wR2 = 0.0556                                                |
| R indices (all data)                     | R1 = 0.1172<br>wR2 = 0.2972                                                             | R1 = 0.0663<br>wR2 = 0.1470                                                             | R1 = 0.0240<br>wR2 = 0.0565                                                |
| Goodness-of-fit on F <sup>2</sup>        | 1.111                                                                                   | 1.036                                                                                   | 1.119                                                                      |
| Largest diff. peak, e.Å <sup>-3</sup>    | 2.208 and -2.706                                                                        | 1.364 and -1.741                                                                        | 0.413 and -0.446                                                           |

## Preparation of mononuclear reference complexes for olefin polymerization

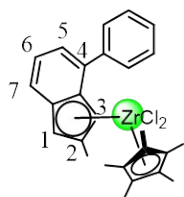

### ( $\eta^5$ -2-Methyl-4-phenyl-indenyl)( $\eta^5$ -pentamethylcyclopentadienyl)ZrCl<sub>2</sub>

**(mono-1).**<sup>1</sup> A solution of PhMgBr (0.498 mL of a 2.4 M solution in THF, 1.19 mmol) was added onto ZnCl<sub>2</sub> (0.190 g, 1.39 mmol) in THF (12 mL). The cloudy solution was stirred for 1 h. Volatiles were removed under vacuum to obtain a white sticky solid. A solution of ( $\eta^5$ -2-methyl-4-bromo-indenyl)( $\eta^5$ -

pentamethylcyclopentadienyl)ZrCl<sub>2</sub> (0.500 g, 1.0 mmol), Pd(*Pt*Bu)<sub>3</sub> (0.013 g, 0.025 mmol) in THF (20 mL) was added onto the white solid. The reaction mixture was stirred for 4 h, the color changing from yellow to orange. THF was removed as much as possible under vacuum. The orange oil obtained was solubilized in toluene (10 mL) and filtered over celite. Addition of a few drops of pentane resulted in the precipitation of a black solid that was filtered off. The solution was evaporated and the solid residue was recrystallized to give **mono-1** as a yellow crystalline solid (0.450 g, 91%). <sup>1</sup>H NMR (400 MHz, CD<sub>2</sub>Cl<sub>2</sub>, 25 °C) (Figure S42):  $\delta$  7.72–7.67 (m, 2H, 2,6-H Ph), 7.50–7.44–7.28 (m, 4H, 7-H indenyl and 3,4,5-H Ph), 7.24 (d,  $J$  = 7.5 Hz, 1H, 5-H indenyl), 7.08 (s, 1H, 6-H indenyl), 6.74 (dd,  $J$  = 2.0, 1.1 Hz, 1H, 1-H indenyl), 6.25 (d,  $J$  = 2.3 Hz, 1H, 3-H indenyl), 2.20 (s, 3H, 2-Me indenyl), 2.02 (s, 15H, C<sub>5</sub>Me<sub>5</sub>).

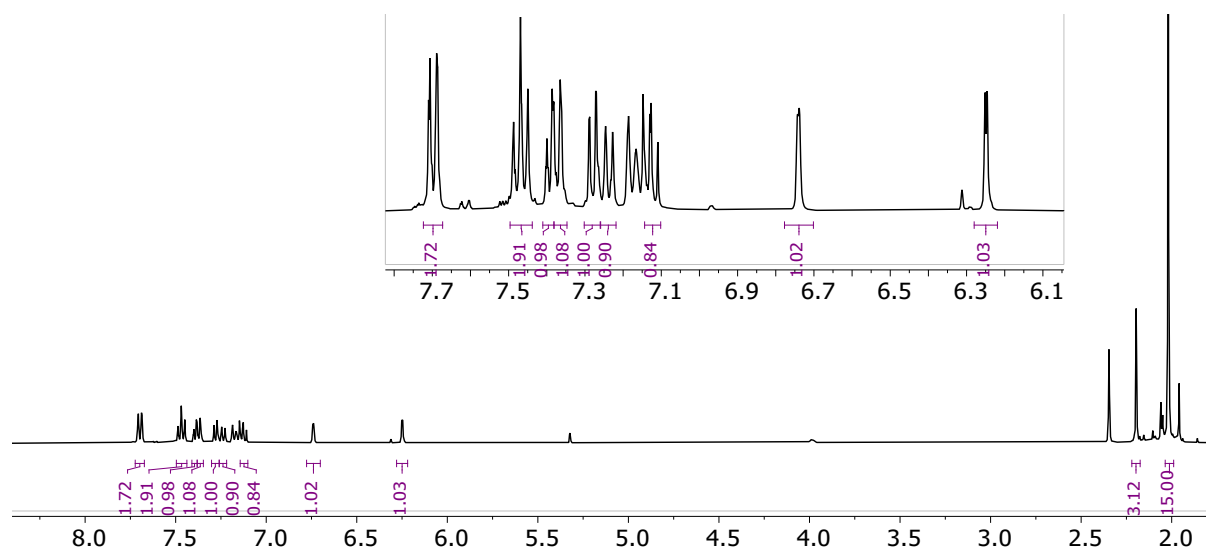

**Figure S42.** <sup>1</sup>H NMR (400 MHz, CD<sub>2</sub>Cl<sub>2</sub>, 25 °C) spectrum of ( $\eta^5$ -2-methyl-4-phenyl-indenyl)( $\eta^5$ -pentamethylcyclopentadienyl)ZrCl<sub>2</sub> (**mono-1**).

<sup>1</sup> Ryabov, A. N.; Izmer, V. V.; Tzarev, A. A.; Uborsky, D. V.; Asachenko, A. F.; Nikulin, M. V.; Canich, J. A. M.; Voskoboynikov, A. Z. *Organometallics* **2009**, *28*, 3614–3617.

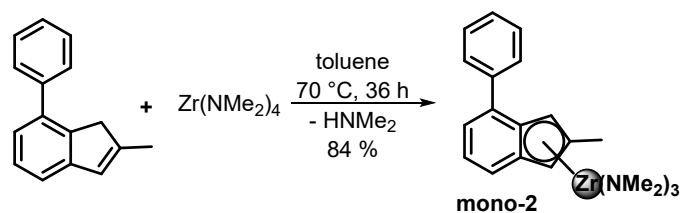

**( $\eta^5$ -2-Methyl-4-phenylindenyl)Zr(NMe<sub>2</sub>)<sub>3</sub> (mono-2).** In a Schlenk flask containing 2-methyl-7-phenyl-1*H*-indene (0.112 g, 0.54 mmol, 1.0 equiv) and Zr(NMe<sub>2</sub>)<sub>4</sub> (0.146 g, 0.69 mmol, 2.0 equiv), toluene (10 mL) was added. The resulting solution was heated at 70 °C for 36 h and, over this time period, volatiles were stripped every 3 h. The reaction mixture was cooled to room temperature and volatiles were removed under vacuum. The crude mixture was washed with hexanes (3 × 5 mL) and dried under vacuum, to give **mono-2** as a yellow glassy solid (0.195 g, 84%). <sup>1</sup>H NMR (400 MHz, C<sub>6</sub>D<sub>6</sub>, 25 °C):  $\delta$  7.74 (dd,  $J$  = 8.2, 1.2, 2H), 7.46 (d,  $J$  = 7.8, 1H), 7.35 (t,  $J$  = 7.6, 2H), 7.21 (t,  $J$  = 7.4, 1H), 7.05–6.96 (m, 2H), 6.31 (d,  $J$  = 2.2, 1H), 6.14 (d,  $J$  = 2.3, 1H), 2.75 (s, 18H, NMe<sub>2</sub>), 2.14 (s, 3H, Me indenyl). <sup>13</sup>C{<sup>1</sup>H} NMR (100 MHz, C<sub>6</sub>D<sub>6</sub>, 25 °C):  $\delta$  141.1 (Cquat), 135.7 (Cquat), 132.0 (Cquat), 128.50, 128.36, 127.06, 124.6 (Cquat), 123.0, 122.5, 121.1, 99.6 (CH Ind), 98.2 (CH Ind), 43.9 (NMe<sub>2</sub>), 14.4 (CH<sub>3</sub> Ind). iASAP-MS:  $m/z$  calcd for C<sub>22</sub>H<sub>32</sub>N<sub>3</sub>Zr [M+H]<sup>+</sup>: 428.1643; found: 428.1643.

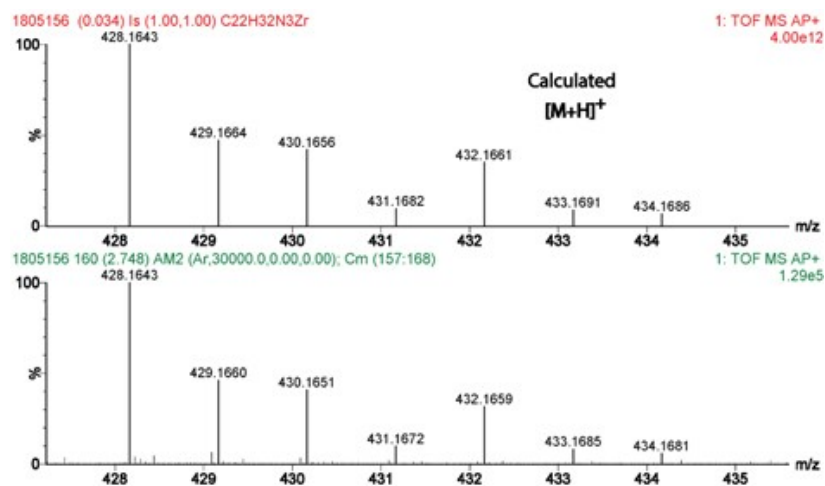

**Figure S43.** PiASAP MSMS spectrum of **mono-2**. The applied sampling cone and collision energy used were 10V and 5 eV, respectively.

**Table S2.** Ethylene polymerization experiments performed with dinuclear complexes  $\{m/p-(E/Z)\text{-BisIndSB}\}(\text{ZrCl}_2\text{Cp}^*)_2$  and the mononuclear reference complex  $(\eta^5\text{-2-methyl-4-phenyl-indenyl})(\eta^5\text{-pentamethylcyclopentadienyl})\text{ZrCl}_2$  (**mono-1**).<sup>a</sup>

| Entry  | Comp. <sup>a</sup>                  | Temp max (°C) <sup>b</sup> | m(PE) (g) <sup>c</sup> | Prod. (kg.mol <sup>-1</sup> .h <sup>-1</sup> ) <sup>d</sup> | $T_m$ (°C) <sup>e</sup> | $\Delta H_m$ (J g <sup>-1</sup> ) <sup>e</sup> | $T_{\text{cryst}}$ (°C) <sup>e</sup> | $M_n$ (g mol <sup>-1</sup> ) <sup>f</sup> | $M_w$ (g mol <sup>-1</sup> ) <sup>f</sup> | $D_M$ <sup>f</sup> |
|--------|-------------------------------------|----------------------------|------------------------|-------------------------------------------------------------|-------------------------|------------------------------------------------|--------------------------------------|-------------------------------------------|-------------------------------------------|--------------------|
| NR2082 | mono-1                              | 60                         | 3.89                   | 3894                                                        | 132                     | 179                                            | 115                                  | 59,000                                    | 242,100                                   | 4.1                |
| NR2080 | <i>m</i> -( <i>E</i> )              | 62                         | 4.53                   | 4529                                                        | 132                     | 170                                            | 116                                  | 65,000                                    | 236,000                                   | 3.6                |
| NR2146 | <i>m</i> -( <i>Z</i> ) <sup>g</sup> | 58                         | 4.20                   | 4198                                                        | 132                     | 159                                            | 118                                  | 73,500                                    | 287,300                                   | 3.9                |
| NR2143 | <i>m</i> -( <i>Z</i> ) <sup>g</sup> | 59                         | 3.98                   | 3983                                                        | 130                     | 119                                            | 118                                  | 93,000                                    | 377,100                                   | 4.1                |
| NR2137 | <i>p</i> -( <i>E</i> )              | 61                         | 3.67                   | 3670                                                        | 133                     | 176                                            | 118                                  | 57,100                                    | 221,200                                   | 3.9                |
| NR2128 | <i>p</i> -( <i>Z</i> )              | 62                         | 5.03                   | 5027                                                        | 132                     | 161                                            | 118                                  | 64,600                                    | 247,700                                   | 3.8                |
| NR2130 | <i>p</i> -( <i>Z</i> )              | 61                         | 5.23                   | 5232                                                        | 130                     | 131                                            | 118                                  | 71,300                                    | 276,500                                   | 3.9                |

<sup>a</sup> Polymerization conducted in a 300-mL glass reactor equipped with a Pelton turbine, in 150 mL of toluene, with  $[\text{Zr}] = 1.0$   $\mu\text{mol}$ , 1000 equiv of MAO vs. Zr, at 50 °C initial temperature, 4 barg ethylene constant pressure; reactions were quenched after 30 min. <sup>b</sup> Maximal temperature recorded in the polymerization reactor. <sup>c</sup> Amount of polymer collected. <sup>d</sup> Catalytic productivity in kg(polymer) mol(Zr)<sup>-1</sup> h<sup>-1</sup>. <sup>e</sup> Melting ( $T_m$ ) temperature, melting enthalpy ( $\Delta H_m$ ) and crystallization temperature ( $T_{\text{cryst}}$ ) as determined by DSC performed at the TotalEnergies research center at a heating rate of 10 °C min<sup>-1</sup>; first and second runs were recorded after cooling to 30 °C; the reported melting temperatures correspond to the second run and the crystallization temperatures to the first run. <sup>f</sup> Number-average ( $M_n$ ), weight-average ( $M_w$ ) molecular weights and dispersity ( $D_M$ ) as determined by SEC at 135 °C in 1,2,4-trichlorobenzene at the TotalEnergies research center in Feluy (Belgium), using polystyrene standards for universal calibration. <sup>g</sup> Experiments conducted with a ca. 1:1 mixture of (*E*)- and (*Z*)- isomers.

**Table S3.** 1-Hexene polymerization experiments performed with dinuclear complexes  $\{m/p-(E/Z)\text{-BisIndSB}\}(\text{ZrCl}_2\text{Cp}^*)_2$  and the mononuclear reference complex  $(\eta^5\text{-2-methyl-4-phenyl-indenyl})(\eta^5\text{-pentamethylcyclopentadienyl})\text{ZrCl}_2$  (**mono-1**).<sup>a</sup>

| Entry  | Comp. <sup>a</sup>                  | m(PH) (g) <sup>b</sup> | Yield (%) <sup>c</sup> | Prod. (kg.mol <sup>-1</sup> .h <sup>-1</sup> ) <sup>d</sup> | $M_n$ (g mol <sup>-1</sup> ) <sup>e</sup> | $D_M$ <sup>e</sup> |
|--------|-------------------------------------|------------------------|------------------------|-------------------------------------------------------------|-------------------------------------------|--------------------|
| NR2066 | mono-1                              | 1.12                   | 17                     | 2240                                                        | 8,000                                     | 2.2                |
| NR2085 | mono-1                              | 0.93                   | 14                     | 1860                                                        | 11,200                                    | 2.3                |
| NR2067 | <i>m</i> -( <i>E</i> )              | 0.45                   | 7                      | 900                                                         | 7,500                                     | 2.0                |
| NR2086 | <i>m</i> -( <i>E</i> )              | 0.47                   | 7                      | 940                                                         | 8,100                                     | 2.2                |
| NR2144 | <i>m</i> -( <i>Z</i> ) <sup>f</sup> | 0.17                   | 3                      | 340                                                         | 19,000                                    | 2.2                |
| NR2145 | <i>m</i> -( <i>Z</i> ) <sup>f</sup> | 0.12                   | 2                      | 240                                                         | 19,000                                    | 2.2                |
| NR2138 | <i>p</i> -( <i>E</i> )              | 0.22                   | 3                      | 440                                                         | 12,900                                    | 2.0                |
| NR2139 | <i>p</i> -( <i>E</i> )              | 0.26                   | 4                      | 520                                                         | 11,300                                    | 2.0                |
| NR2135 | <i>p</i> -( <i>Z</i> )              | 0.27                   | 4                      | 540                                                         | 10,800                                    | 1.9                |
| NR2136 | <i>p</i> -( <i>Z</i> )              | 0.23                   | 3                      | 460                                                         | 10,100                                    | 1.9                |

<sup>a</sup> Polymerization conducted in a glass Schlenk flask equipped with a magnetic stir bar, in 50 mL of toluene, with  $[\text{Zr}] = 1.0$   $\mu\text{mol}$ , 1000 equiv of MAO vs. Zr, 10 mL of 1-hexene, at 50 °C initial temperature; reactions were quenched after 30 min. <sup>b</sup> Amount of polymer collected. <sup>c</sup> Yield of polymer recovered. <sup>d-e</sup> See Table S2. <sup>f</sup> Experiments conducted with a ca. 1:1 mixture of (*E*)- and (*Z*)- isomers.

**Table S4.** Ethylene/1-hexene copolymerization experiments performed with dinuclear complexes  $\{m/p-(E/Z)\text{-BisIndSB}\}(\text{ZrCl}_2\text{Cp}^*)_2$  and the mononuclear reference complex  $(\eta^5\text{-2-methyl-4-phenyl-indenyl})(\eta^5\text{-pentamethylcyclopentadienyl})\text{ZrCl}_2$  (**mono-1**).<sup>a</sup>

| Entry  | Comp. <sup>a</sup>                  | Temp max (°C) <sup>b</sup> | m(pol) (g) <sup>c</sup> | Prod. (kg.mol <sup>-1</sup> .h <sup>-1</sup> ) <sup>d</sup> | T <sub>m</sub> (°C) <sup>e</sup> | ΔH <sub>m</sub> (J g <sup>-1</sup> ) <sup>e</sup> | T <sub>cryst</sub> (°C) <sup>e</sup> | M <sub>n</sub> (g mol <sup>-1</sup> ) <sup>f</sup> | M <sub>w</sub> (g mol <sup>-1</sup> ) <sup>f</sup> | D <sub>M</sub> <sup>f</sup> | 1-hex (wt%) <sup>h</sup> |
|--------|-------------------------------------|----------------------------|-------------------------|-------------------------------------------------------------|----------------------------------|---------------------------------------------------|--------------------------------------|----------------------------------------------------|----------------------------------------------------|-----------------------------|--------------------------|
| NR2074 | mono-1                              | 57                         | 4.40                    | 4400                                                        | 118                              | 119                                               | 105                                  | 47,700                                             | 218,900                                            | 4.6                         | 4.1                      |
| NR2077 | <i>m</i> -( <i>E</i> )              | 59                         | 5.64                    | 5641                                                        | 118                              | 128                                               | 104                                  | 39,100                                             | 164,900                                            | 4.2                         | 4.7                      |
| NR2087 | <i>m</i> -( <i>E</i> )              | 64                         | 6.68                    | 6681                                                        | 118                              | 129                                               | 103                                  | 36,900                                             | 151,900                                            | 4.1                         | 4.9                      |
| NR2149 | <i>m</i> -( <i>Z</i> ) <sup>g</sup> | 60                         | 3.22                    | 3221                                                        | 118                              | 108                                               | 107                                  | 48,700                                             | 212,400                                            | 4.4                         | 4.3                      |
| NR2150 | <i>m</i> -( <i>Z</i> ) <sup>g</sup> | 62                         | 4.50                    | 4502                                                        | 119                              | 108                                               | 107                                  | 39,000                                             | 185,500                                            | 4.8                         | 4.3                      |
| NR2141 | <i>p</i> -( <i>E</i> )              | 65                         | 5.79                    | 5786                                                        | 120                              | 117                                               | 107                                  | 40,600                                             | 187,500                                            | 4.6                         | 4.0                      |
| NR2142 | <i>p</i> -( <i>E</i> )              | 65                         | 6.28                    | 6281                                                        | 119                              | 113                                               | 107                                  | 39,400                                             | 181,600                                            | 4.6                         | 4.0                      |
| NR2132 | <i>p</i> -( <i>Z</i> )              | 65                         | 6.39                    | 6393                                                        | 120                              | 116                                               | 107                                  | 40,000                                             | 186,700                                            | 4.7                         | 4.0                      |
| NR2133 | <i>p</i> -( <i>Z</i> )              | 65                         | 6.18                    | 6184                                                        | 120                              | 122                                               | 107                                  | 40,200                                             | 192,900                                            | 4.8                         | 4.0                      |

<sup>a</sup> Polymerization conducted in a 300-mL glass reactor equipped with a Pelton turbine, in 100 mL of toluene, with [Zr] = 1.0 μmol, 1000 equiv of MAO vs. Zr, at 50 °C initial temperature, 4 barg ethylene constant pressure and 2.5 mL (0.02 mol) of 1-hexene; reactions were quenched after 30 min. <sup>b-g</sup> See Table S2. <sup>h</sup> Amount of 1-hexene incorporated in the copolymer, as determined by <sup>13</sup>C NMR spectroscopy.

**Table S5.** Ethylene polymerization experiments performed with dinuclear complexes  $\{o-(E/Z)\text{-BisIndSB}\}(\text{Zr}(\text{NMe}_2)_3)_2$  and the mononuclear reference complex  $(\eta^5\text{-2-methyl-4-phenyl-indenyl})\text{Zr}(\text{NMe}_2)_3$  (**mono-2**).<sup>a,f</sup>

| Entry | Comp. <sup>a</sup>              | m(PE) (g) <sup>b</sup> | Prod. (kg.mol <sup>-1</sup> .h <sup>-1</sup> ) <sup>c</sup> | T <sub>m</sub> (°C) <sup>d</sup> | T <sub>cryst</sub> (°C) <sup>d</sup> |
|-------|---------------------------------|------------------------|-------------------------------------------------------------|----------------------------------|--------------------------------------|
| TC1   | mono-2                          | 0.358                  | 955                                                         | 135                              | 119                                  |
| TC2   | mono-2                          | 0.420                  | 1120                                                        | 135                              | 119                                  |
| TC3   | <i>o</i> -( <i>E</i> )-Bis(Ind) | 0.293                  | 781                                                         | 134                              | 119                                  |
| TC4   | <i>o</i> -( <i>E</i> )-Bis(Ind) | 0.310                  | 827                                                         | 134                              | 119                                  |
| TC5   | <i>o</i> -( <i>Z</i> )-Bis(Ind) | 0.256                  | 683                                                         | 135                              | 118                                  |
| TC6   | <i>o</i> -( <i>Z</i> )-Bis(Ind) | 0.223                  | 595                                                         | 135                              | 118                                  |

<sup>a</sup> Polymerization conducted in a 300-mL glass reactor equipped with a Pelton turbine, in 150 mL of toluene, with [Zr] = 1.0 μmol, 5000 equiv of MAO vs. Zr, at 50 °C initial temperature, 4 barg ethylene constant pressure; reactions were quenched after 15 min. <sup>b</sup> Amount of polymer collected. <sup>c</sup> Catalytic productivity in kg(polymer) mol(Zr)<sup>-1</sup> h<sup>-1</sup>. <sup>d</sup> Melting (T<sub>m</sub>) and crystallization (T<sub>cryst</sub>) temperatures as determined by DSC performed at a heating rate of 10 °C min<sup>-1</sup>; first and second runs were recorded after cooling to 30 °C; the reported melting temperatures correspond to the second run and the crystallization temperatures to the first run. <sup>f</sup> Note that none of the polymers were soluble at 135 °C in 1,2,4-trichlorobenzene, hence no SEC measurements could be conducted.

**Table S6.** Ethylene/1-hexene copolymerization experiments performed with dinuclear complexes  $\{o-(E/Z)\text{-BisIndSB}\}(\text{Zr}(\text{NMe}_2)_3)_2$  and the mononuclear reference complex ( $\eta^5\text{-2-methyl-4-phenyl-indenyl}\text{Zr}(\text{NMe}_2)_3$  (**mono-2**)).<sup>a</sup>

| Entry | Comp. <sup>a</sup>              | m(pol)<br>(g) <sup>b</sup> | Prod.<br>(kg.mol <sup>-1</sup> .h <sup>-1</sup> ) <sup>c</sup> | T <sub>m</sub><br>(°C) <sup>d</sup> | T <sub>cryst</sub><br>(°C) <sup>d</sup> |
|-------|---------------------------------|----------------------------|----------------------------------------------------------------|-------------------------------------|-----------------------------------------|
| TC1   | mono-2                          | 0.311                      | 415                                                            | 122                                 | 111                                     |
| TC2   | mono-2                          | 0.295                      | 393                                                            | 122                                 | 112                                     |
| TC3   | <i>o</i> -( <i>E</i> )-Bis(Ind) | 0.320                      | 427                                                            | 125                                 | 113                                     |
| TC4   | <i>o</i> -( <i>E</i> )-Bis(Ind) | 0.275                      | 367                                                            | 125                                 | 113                                     |
| TC5   | <i>o</i> -( <i>Z</i> )-Bis(Ind) | 0.258                      | 344                                                            | 125                                 | 113                                     |
| TC6   | <i>o</i> -( <i>Z</i> )-Bis(Ind) | 0.279                      | 372                                                            | 125                                 | 113                                     |

<sup>a</sup> Polymerization conducted in a 300-mL glass reactor equipped with a Pelton turbine, in 150 mL of toluene, with  $[\text{Zr}] = 1.0 \mu\text{mol}$ , 5000 equiv of MAO vs. Zr, at 50 °C initial temperature, 4 barg ethylene constant pressure, 2.5 mL (0.02 mol) of 1-hexene; reactions were quenched after 30 min. <sup>b</sup> Amount of polymer collected. <sup>c</sup> Catalytic productivity in kg(polymer) mol(Zr)<sup>-1</sup> h<sup>-1</sup>. <sup>d</sup> Melting ( $T_m$ ) and crystallization ( $T_{\text{cryst}}$ ) temperatures as determined by DSC performed at a heating rate of 10 °C min<sup>-1</sup>; first and second runs were recorded after cooling to 30 °C; the reported melting temperatures correspond to the second run and the crystallization temperatures to the first run.



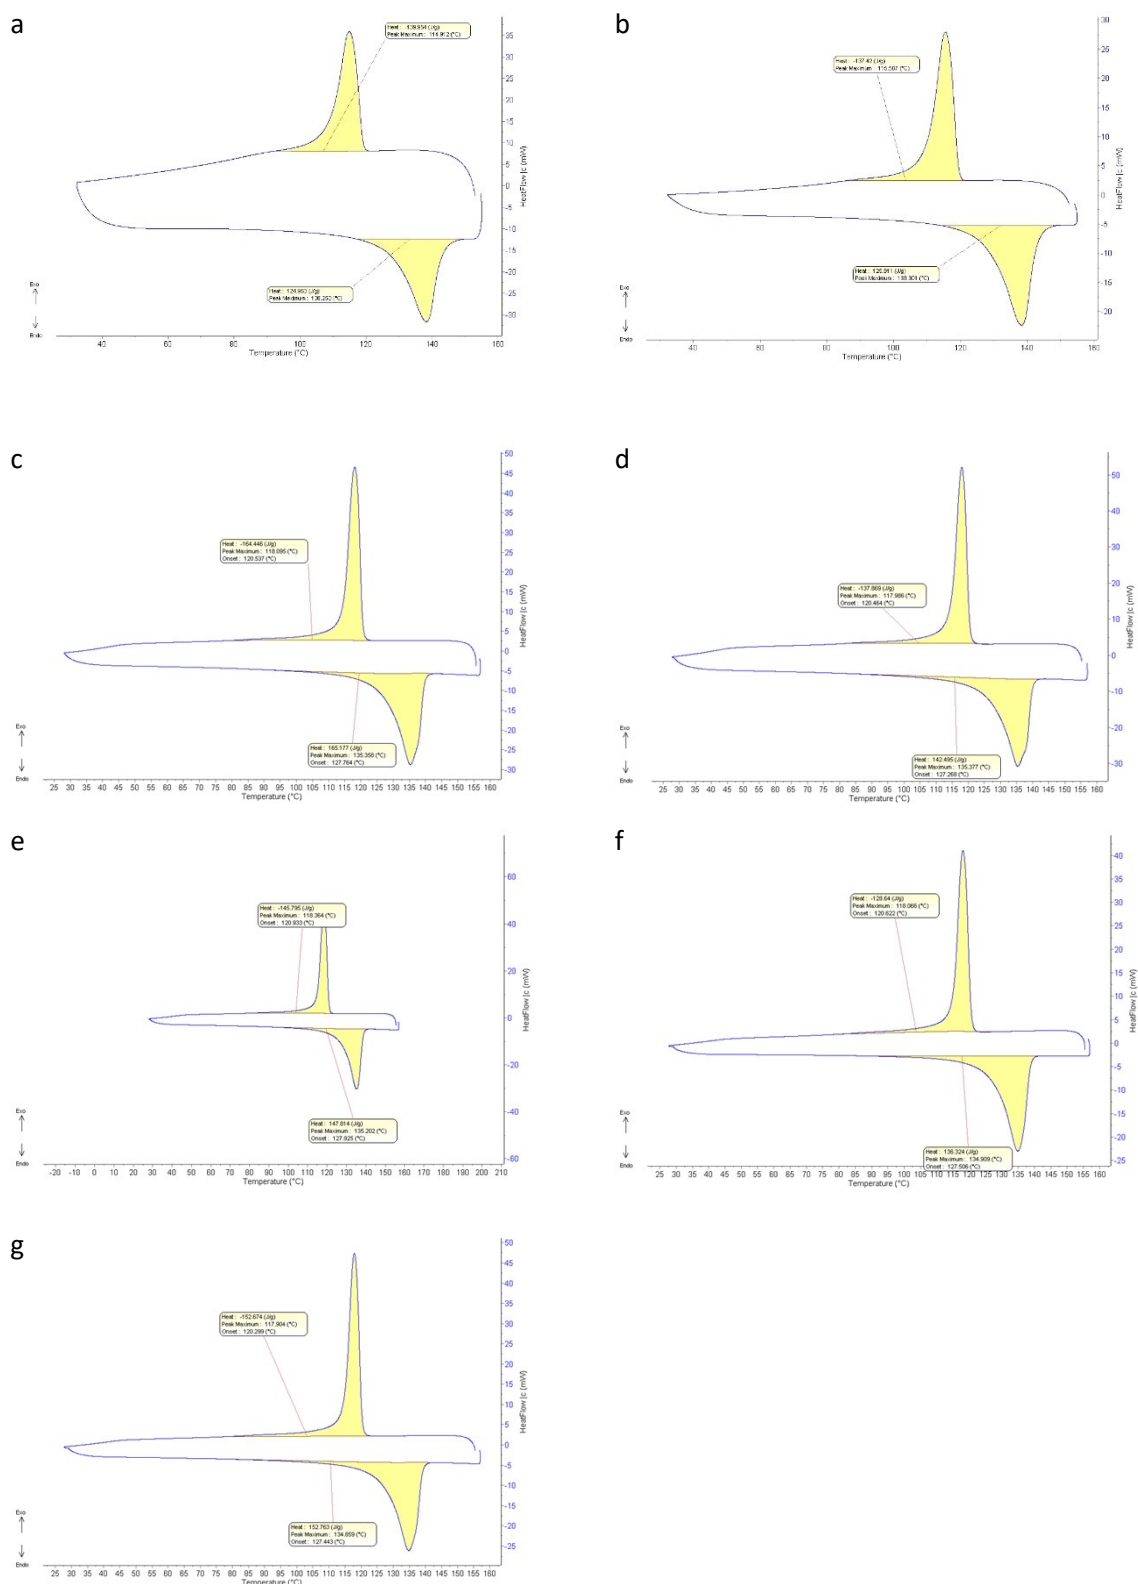

**Figure S44.** Representative DSC traces of polyethylene samples corresponding to a) NR2082, b) NR2080, c) NR2146, d) NR2143, e) NR2137, f) NR2128, g) NR2130 entries from Table S2.

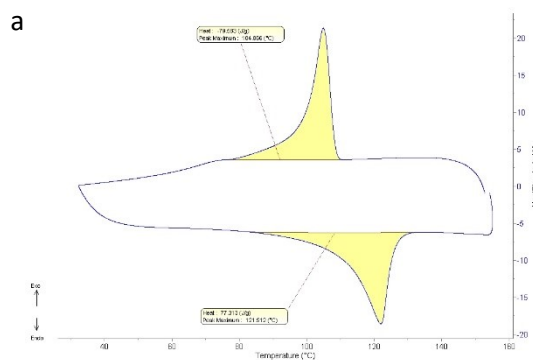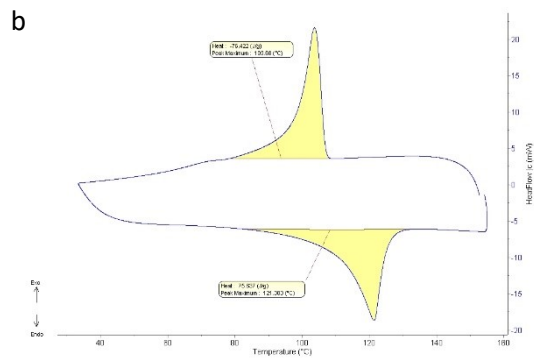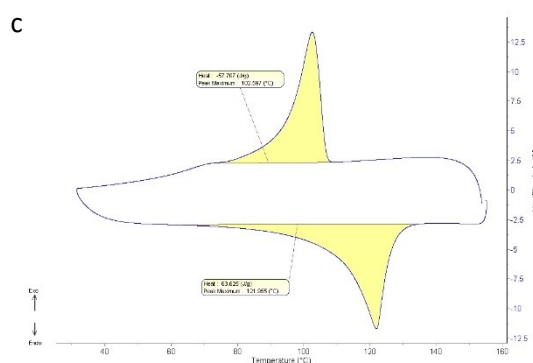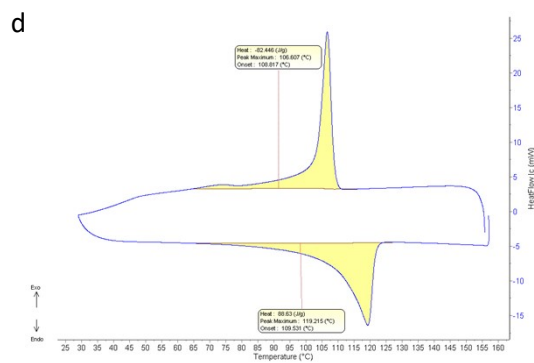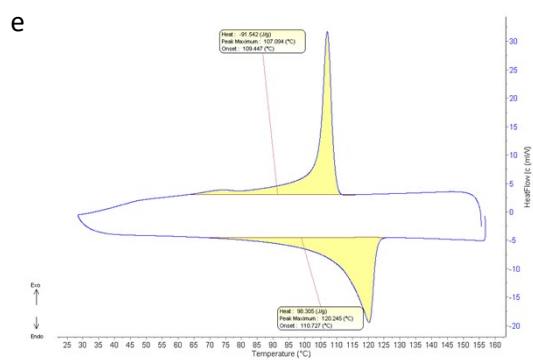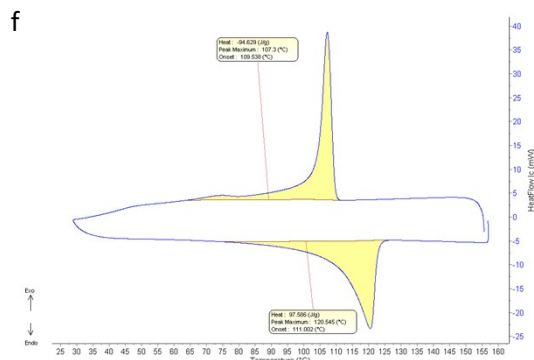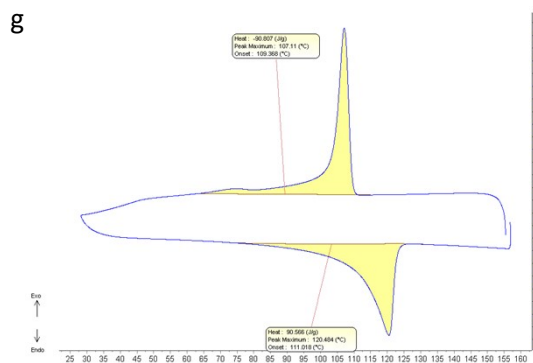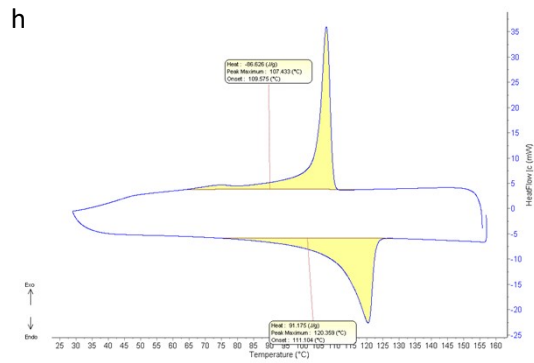

i

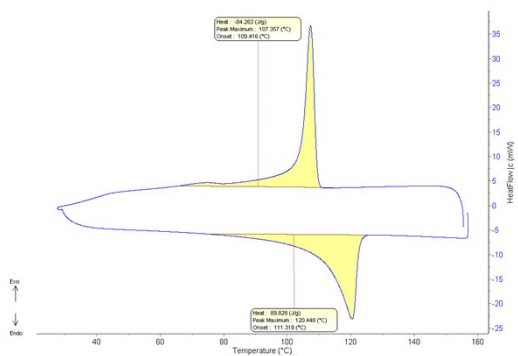

**Figure S45.** Representative DSC traces of ethylene / 1-hexene copolymer samples corresponding to a) NR2074, b) NR2077, c) NR2087, d) NR2149, e) NR2150, f) NR2141, g) NR2142, h) NR2132 and i) entries from Table S4.

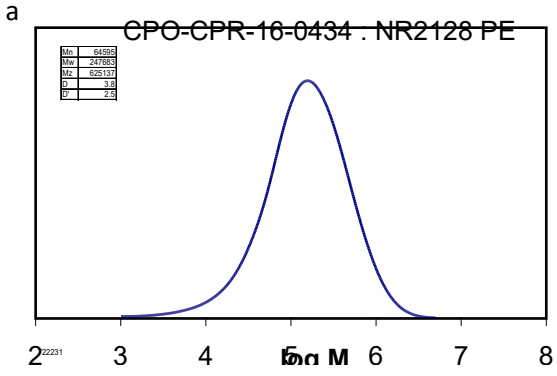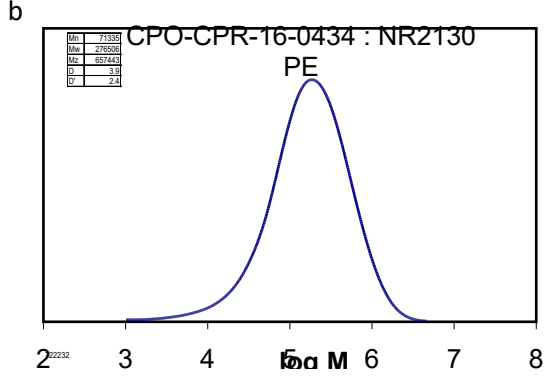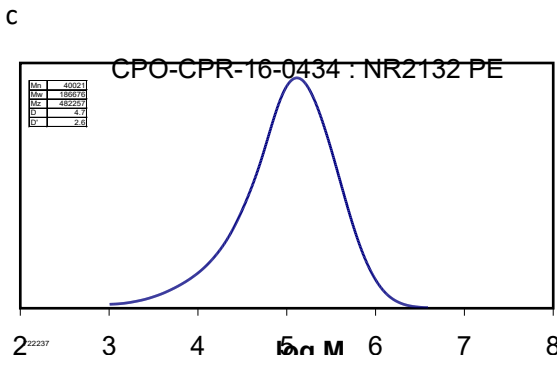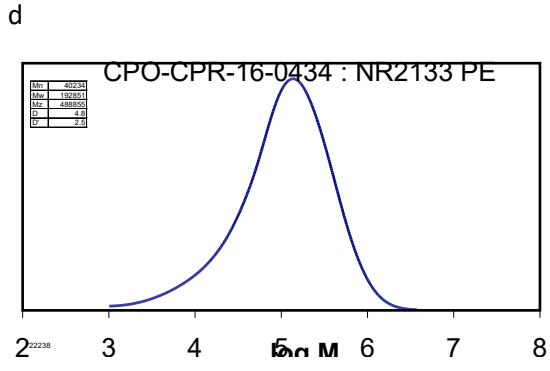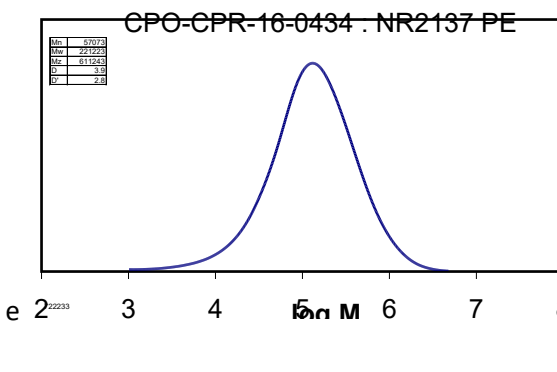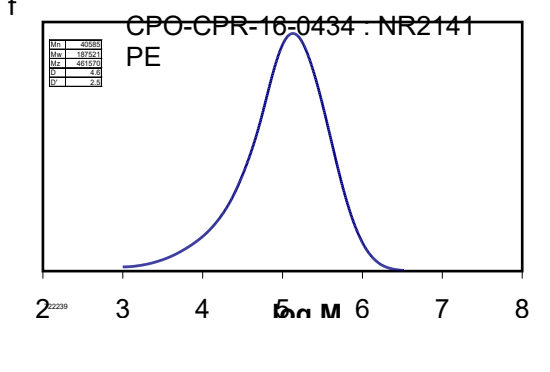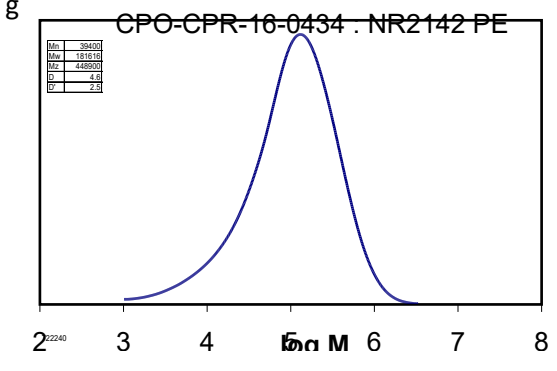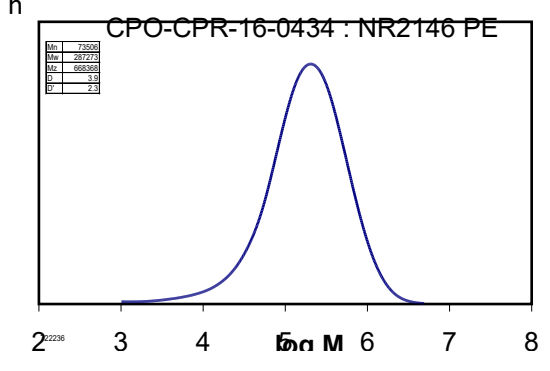

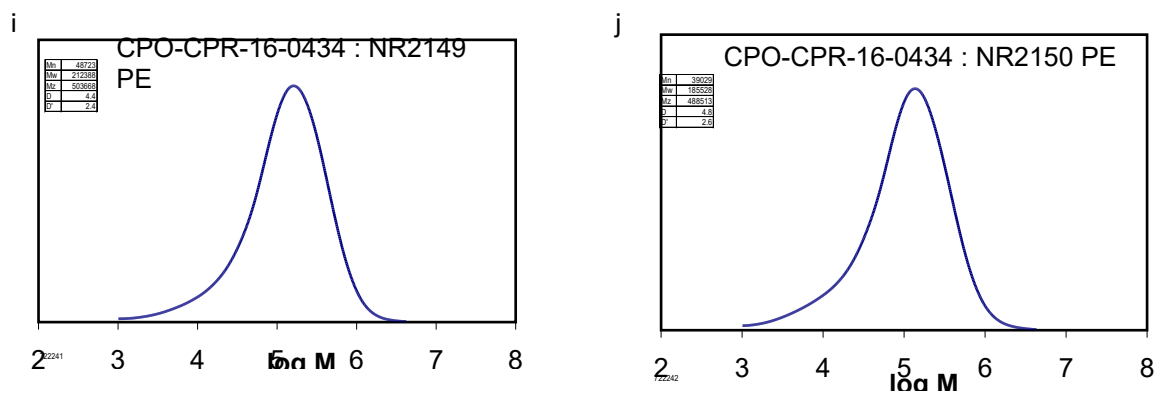

**Figure S46.** Representative Size Exclusion Chromatography traces of polyethylene and ethylene / 1-hexene copolymer samples of: a) Entry NR2108 from Table S2, b) Entry NR2130 from Table S2, c) Entry NR2132 from Table S4, d) Entry NR2133 from Table S4, e) Entry NR2137 from Table S2, f) Entry NR2141 from Table S4, g) Entry NR2142 from Table S4, h) Entry NR2146 from Table S2, i) Entry NR2149 from Table S4, j) Entry NR2150 from Table S4,
